# Supplementary material for: Ozone-induced changes in the serum metabolome: Role of the microbiome
Source: PLoS One. 2019 Aug 27;14(8):e0221633. doi: 10.1371/journal.pone.0221633 (PMC6711505; doi:10.1371/journal.pone.0221633)
Supplement: S1 Table — The blue shaded areas indicate significant (p<0.05, q<0.10) effects on two-way ANOVA. Fold change results are the ratio of mean lipid metabolite scaled peak area in mice treated with regular drinking water or antibiotic-supplemented drinking water and exposed to air or ozone, as described in Table 2. Red and green shading indicates metabolites with significantly (p<0.05, q<0.10) increased (red) or decreased (green) values. p and q values for the various comparisons along with mean scaled peak areas for each group are shown in the columns on the right. (XLSX) [file pone.0221633.s001.xlsx]

## Sheet: pathway heatmap
	Microbial depletion and ozone exposure, mouse serum
											Two-Way ANOVA			Fold of Change
	Heat map of statistically significant biochemicals profiled in this study.		Blue shaded cells indicate a significant (p≤0.05, q<0.10) ANOVA effect.											ANOVA Contrasts					Statistical Values
														Ozone Air		Abx H2O			Two-Way ANOVA						ANOVA Contrasts									Mean Values					% Filled Values
	Pathway Sort Order	Super Pathway	Sub Pathway	Biochemical Name	Platform	Comp ID	KEGG	HMDB	PubChem		Exposure Main Effect	Treatment Main Effect	Exposure: Treatment Interaction						Exposure Main Effect		Treatment Main Effect		Exposure:Treatment Interaction		Ozone H2O / Air H2O		Ozone Abx / Air Abx		Air Abx / Air H2O		Ozone Abx / Ozone H2O			Air H2O	Air Abx	Ozone H2O	Ozone Abx		Air H2O	Air Abx	Ozone H2O	Ozone Abx		Super Pathway	Sub Pathway	Chemical ID	CAS	RI	Mass
														H2O	Abx	Air	Ozone	X	p-value	q-value	p-value	q-value	p-value	q-value	p-value	q-value	p-value	q-value	p-value	q-value	p-value	q-value	X					X					X
	1	Amino Acid	Glycine, Serine and Threonine Metabolism	glycine	GC/MS	11777	C00037	HMDB00123	750					0.62	0.74	1.02	1.22		0.0097	0.0069	0.294	0.2038	0.6865	0.2984	0.0324	0.0336	0.1053	0.0859	0.6435	0.3072	0.3051	0.3424		1.3255	1.3538	0.8222	1.0019		100	100	100	100		Amino Acid	Glycine, Serine and Threonine Metabolism	340	56-40-6	1166	101.9
	2			N-acetylglycine	LC/MS polar	27710		HMDB00532	10972					2.29	1.99	0.77	0.67		1.5341e-05	3.5413e-05	0.0094	0.0154	0.5215	0.2513	0.0003	0.0008	0.0032	0.0058	0.1414	0.1069	0.0217	0.0719		0.9726	0.747	2.2309	1.4888		100	100	100	100		Amino Acid	Glycine, Serine and Threonine Metabolism	100001006	543-24-8	1780	116.035
	4			sarcosine (N-Methylglycine)	GC/MS	1516	C00213	HMDB00271	1088					1.09	0.91	1.28	1.07		0.9898	0.3147	0.5585	0.3189	0.488	0.2423	0.6167	0.3092	0.6295	0.3666	0.3676	0.2134	0.9382	0.6234		0.8597	1.1021	0.9387	1.0036		75	88	88	75		Amino Acid	Glycine, Serine and Threonine Metabolism	1023	107-97-1	1182.9	116
	5			dimethylglycine	LC/MS pos	5086	C01026	HMDB00092	673					1.03	1.18	0.65	0.75		0.0897	0.0433	6.1616e-07	5.2254e-06	0.2074	0.1453	0.7436	0.3539	0.0399	0.0403	8.2685e-06	3.7732e-05	0.0012	0.0115		1.1416	0.7435	1.1702	0.8762		100	100	100	100		Amino Acid	Glycine, Serine and Threonine Metabolism	806	1118-68-9	719.4	104.071
	6			betaine	LC/MS pos	3141	C00719	HMDB00043	247					0.81	0.88	1.02	1.11		0.0021	0.002	0.3294	0.2223	0.3786	0.2075	0.0053	0.0085	0.0895	0.0743	0.9453	0.3907	0.1928	0.2484		1.1147	1.1342	0.8989	0.9972		100	100	100	100		Amino Acid	Glycine, Serine and Threonine Metabolism	799	107-43-7	734	118.086
	9			serine	LC/MS pos	1648	C00065	HMDB00187	5951					1.34	1.12	1.44	1.2		0.0003	0.0004	6.7932e-06	3.9279e-05	0.0576	0.0623	0.0002	0.0005	0.1329	0.1038	1.2212e-05	4.9756e-05	0.0186	0.0682		0.746	1.0731	1.0008	1.2019		100	100	100	100		Amino Acid	Glycine, Serine and Threonine Metabolism	503	56-45-1	676.7	106.05
	10			N-acetylserine	LC/MS polar	37076		HMDB02931	65249					0.75	0.85	0.91	1.02		0.0128	0.0087	0.6175	0.3401	0.4641	0.2359	0.023	0.0253	0.1857	0.1349	0.3853	0.2168	0.8679	0.6046		1.2244	1.1102	0.9231	0.9433		100	100	100	100		Amino Acid	Glycine, Serine and Threonine Metabolism	100001851	97-14-3	2000	146.046
	14			threonine	LC/MS pos	1284	C00188	HMDB00167	6288					1.23	1.15	1.16	1.09		0.0002	0.0002	0.006	0.0106	0.3414	0.193	0.0008	0.0018	0.0228	0.0265	0.0095	0.0125	0.1675	0.228		0.8581	0.9965	1.053	1.1429		100	100	100	100		Amino Acid	Glycine, Serine and Threonine Metabolism	564	72-19-5	701.5	120.066
	15			N-acetylthreonine	LC/MS neg	33939	C01118		152204					0.73	0.76	0.88	0.92		0.0041	0.0033	0.1401	0.12	0.8999	0.3513	0.0289	0.0304	0.0427	0.0428	0.2545	0.1617	0.3336	0.3612		1.3	1.1422	0.9434	0.8714		100	100	100	100		Amino Acid	Glycine, Serine and Threonine Metabolism	100001274	17093-74-2	821.6	160.062
	25		Alanine and Aspartate Metabolism	alanine	LC/MS pos	1126	C00041	HMDB00161	5950					1.21	1.34	0.99	1.09		1.6115e-05	3.6073e-05	0.4439	0.2775	0.3077	0.1833	0.0065	0.0098	0.0001	0.0005	0.8542	0.3691	0.2097	0.2585		0.9004	0.8907	1.0916	1.1914		100	100	100	100		Amino Acid	Alanine and Aspartate Metabolism	811	56-41-7	696	90.055
	26			N-acetylalanine	LC/MS polar	1585	C02847	HMDB00766	88064					0.83	0.75	1.08	0.97		0.0013	0.0014	0.7891	0.3921	0.423	0.2247	0.062	0.0544	0.0044	0.0074	0.4501	0.2405	0.7039	0.5434		1.1472	1.2393	0.9542	0.9296		100	100	100	100		Amino Acid	Alanine and Aspartate Metabolism	1110	97-69-8	1564.8	130.051
	28			aspartate	LC/MS polar	443	C00049	HMDB00191	5960					0.86	0.57	1.3	0.86		0.0019	0.0018	0.3183	0.2171	0.3144	0.1854	0.1014	0.0797	0.0039	0.0068	0.1601	0.1179	0.9953	0.6396		1.0598	1.3788	0.9073	0.7796		100	100	100	100		Amino Acid	Alanine and Aspartate Metabolism	234	56-84-8	3500	132.03
	30			asparagine	LC/MS polar	512	C00152	HMDB00168	6267					1.46	1.27	1.29	1.12		2.1199e-06	7.3297e-06	0.0015	0.0035	0.1577	0.1255	1.477e-05	8.1809e-05	0.0036	0.0065	0.0015	0.0028	0.1551	0.2195		0.7282	0.9416	1.0654	1.1969		100	100	100	100		Amino Acid	Alanine and Aspartate Metabolism	917	70-47-3	2951.1	131.046
	31			N-acetylasparagine	LC/MS pos	33942		HMDB06028	99715					0.43	0.61	0.69	0.97		2.0939e-05	4.5135e-05	0.0737	0.0757	0.1828	0.1357	8.8782e-05	0.0003	0.0133	0.017	0.0304	0.0311	0.7303	0.5536		2.0023	1.3834	0.867	0.8421		100	100	100	100		Amino Acid	Alanine and Aspartate Metabolism	100001257	4033-40-3	961.6	175.071
	32			N-acetylaspartate (NAA)	LC/MS polar	22185	C01042	HMDB00812	65065					1.53	1.21	1.39	1.1		0.0001	0.0002	0.0068	0.0118	0.0874	0.0834	0.0002	0.0005	0.075	0.0649	0.0025	0.0041	0.4219	0.4145		0.7103	0.9838	1.0886	1.195		100	100	100	100		Amino Acid	Alanine and Aspartate Metabolism	100000787	997-55-7;997-55-7	3143	174.041
	38		Glutamate Metabolism	glutamate	LC/MS pos	57	C00025	HMDB00148	611					0.82	0.59	1.17	0.85		0.0008	0.0009	0.6935	0.3646	0.3506	0.1971	0.0583	0.0518	0.0025	0.0051	0.3488	0.2057	0.6997	0.5434		1.0116	1.1793	0.8256	0.699		100	100	100	100		Amino Acid	Glutamate Metabolism	561	56-86-0	710	148.06
	39			glutamine	LC/MS pos	53	C00064	HMDB00641	5961					1.2	1.53	0.77	0.98		7.722e-12	3.4316e-10	1.8168e-05	8.7212e-05	9.132e-05	0.0009	6.6475e-05	0.0003	8.53e-12	1.1898e-09	1.8135e-07	1.5914e-06	0.6792	0.5356		0.9357	0.7197	1.1194	1.1017		100	100	100	100		Amino Acid	Glutamate Metabolism	563	56-85-9	680	147.076
	40			N-acetylglutamate	LC/MS pos	15720	C00624	HMDB01138	70914					0.49	0.65	0.91	1.2		0.0009	0.001	0.901	0.4301	0.2909	0.1773	0.0021	0.0038	0.0713	0.0629	0.5068	0.2622	0.4025	0.4025		1.592	1.4424	0.7816	0.9414		100	100	100	100		Amino Acid	Glutamate Metabolism	100000282	5817-08-03	1492	190.071
	41			N-acetylglutamine	LC/MS pos	33943	C02716	HMDB06029	182230					0.69	1.08	0.35	0.56		0.1689	0.0725	8.8333e-10	1.6052e-08	0.0242	0.0375	0.0121	0.016	0.4983	0.3015	8.796e-09	1.1806e-07	6.3625e-05	0.0014		1.8105	0.6418	1.2402	0.6904		100	100	100	100		Amino Acid	Glutamate Metabolism	100001253	2490-97-3	1193	189.087
	42			N-acetyl-aspartyl-glutamate (NAAG)	LC/MS pos	35665	C12270	HMDB01067	5255					1.12	0.77	1.48	1.01		0.8552	0.2832	0.1873	0.1471	0.2787	0.1732	0.5204	0.2725	0.3699	0.2367	0.0934	0.0767	0.8626	0.6035		0.8967	1.3228	1.0064	1.0197		100	100	100	100		Amino Acid	Glutamate Metabolism	100001612	3106-85-2	1575.4	305.098
	49			pyroglutamine*	LC/MS pos	46225			134508					0.49	0.66	0.71	0.95		5.5889e-10	9.9343e-09	0.0015	0.0034	0.0147	0.0256	4.298e-09	9.247e-08	6.6192e-05	0.0003	0.0002	0.0005	0.5152	0.463		1.8351	1.2938	0.8989	0.8521		100	100	100	100		Amino Acid	Glutamate Metabolism	100001540	2353-44-8	750	129.066
	53		Histidine Metabolism	histidine	LC/MS neg	59	C00135	HMDB00177	6274					1.2	1.14	1	0.96		0.0005	0.0007	0.6618	0.3552	0.5122	0.2482	0.0031	0.0054	0.0291	0.0316	0.8765	0.3738	0.4407	0.4191		0.9078	0.9081	1.0854	1.0385		100	100	100	100		Amino Acid	Histidine Metabolism	355	5934-29-2	755.9	154.062
	54			N-acetylhistidine	LC/MS pos	33946	C02997	HMDB32055	75619					0.81	0.79	0.69	0.67		0.0136	0.0092	4.0402e-05	0.0002	0.779	0.3221	0.1079	0.0827	0.0486	0.0468	0.0031	0.0049	0.0011	0.0113		1.3313	0.9122	1.0824	0.7213		100	100	100	100		Amino Acid	Histidine Metabolism	100001293	39145-52-3	848	198.087
	55			1-methylhistidine	LC/MS neg	30460	C01152	HMDB00001	92105					1.76	1.93	0.71	0.78		3.0573e-06	9.5341e-06	0.0056	0.0102	0.5392	0.2578	0.001	0.0022	9.5433e-05	0.0004	0.016	0.0189	0.1033	0.1727		0.9266	0.6574	1.6315	1.266		100	100	100	100		Amino Acid	Histidine Metabolism	100001051	332-80-9	1227	168.078
	56			3-methylhistidine	LC/MS neg	15677	C01152	HMDB00479	64969					1.36	1.2	1.14	1.01		0.0066	0.0049	0.4792	0.2888	0.4594	0.2359	0.0145	0.0181	0.1336	0.1041	0.3084	0.1878	0.9815	0.6373		0.7964	0.9092	1.0821	1.0945		100	100	100	100		Amino Acid	Histidine Metabolism	100000042	368-16-1	906.3	168.078
	57			N-acetyl-3-methylhistidine*	LC/MS pos	43256			193270					1.35	0.73	1.78	0.96		0.9248	0.3003	0.005	0.0095	0.0013	0.0053	0.0151	0.0187	0.0207	0.0247	6.7174e-05	0.0002	0.7184	0.5518		0.7535	1.3384	1.0176	0.9723		100	100	100	100		Amino Acid	Histidine Metabolism	100002204	37841-04-6	917	212.103
	58			N-acetyl-1-methylhistidine*	LC/MS pos	43255								1.32	1.12	1.06	0.89		0.0302	0.0179	0.534	0.3088	0.2433	0.1608	0.0204	0.0232	0.4465	0.2768	0.6939	0.3212	0.2083	0.2582		0.9288	0.9843	1.2306	1.1007		100	100	100	100		Amino Acid	Histidine Metabolism	100004299		987	212.103
	60			trans-urocanate	LC/MS pos	607	C00785	HMDB00301	736715					0.79	0.76	1.56	1.5		0.1424	0.0628	0.0106	0.0164	1	0.3758	0.295	0.1809	0.295	0.1974	0.0631	0.0552	0.0631	0.1303		1.0034	1.5643	0.7922	1.1887		100	100	100	100		Amino Acid	Histidine Metabolism	537	104-98-3	1125.4	139.05
	63			imidazole propionate	LC/MS pos	40730		HMDB02271	70630					0.46	0.48	1.6	1.65		0.0004	0.0005	0.033	0.0401	0.7152	0.3026	0.0145	0.0181	0.0041	0.0069	0.0754	0.0642	0.1957	0.2491		1.3835	2.2122	0.6378	1.0531		100	100	100	100		Amino Acid	Histidine Metabolism	100003434	1074-59-5	1020	141.066
	64			imidazole lactate	LC/MS pos	15716	C05568	HMDB02320	440129					0.77	0.77	0.83	0.83		0.0004	0.0005	0.0054	0.01	0.9714	0.3697	0.0083	0.0116	0.0073	0.0105	0.0443	0.0418	0.0397	0.0992		1.2377	1.0253	0.9579	0.792		100	100	100	100		Amino Acid	Histidine Metabolism	100000263	14403-45-3	782.7	157.061
	70			1-methylimidazoleacetate	LC/MS pos	32350	C05828	HMDB02820	75810					0.95	0.82	1.12	0.97		0.0407	0.023	0.5649	0.3208	0.2375	0.1582	0.5121	0.2693	0.0248	0.0281	0.2161	0.145	0.6621	0.5312		1.0193	1.1414	0.9715	0.9412		100	100	100	100		Amino Acid	Histidine Metabolism	100001208	2625-49-2	833	141.066
	71			4-imidazoleacetate	LC/MS pos	32349	C02835	HMDB02024	96215					0.67	0.65	1.45	1.4		0.0035	0.0029	0.0145	0.0204	0.7991	0.3271	0.0473	0.0446	0.0213	0.0252	0.0526	0.048	0.108	0.1777		1.0453	1.5138	0.7034	0.9857		100	100	100	100		Amino Acid	Histidine Metabolism	100001207	645-65-8	757	127.05
	73		Lysine Metabolism	lysine	LC/MS pos	1301	C00047	HMDB00182	5962					1.13	1.05	1.14	1.06		0.0492	0.0263	0.0333	0.0402	0.3268	0.1905	0.0395	0.0394	0.4606	0.2836	0.0298	0.0306	0.3876	0.3936		0.9061	1.0332	1.0214	1.0815		100	100	100	100		Amino Acid	Lysine Metabolism	407	56-87-1	613.8	147.113
	74			N2-acetyllysine	LC/MS pos	36751	C12989	HMDB00446	92907					0.53	0.48	1.26	1.14		8.4678e-09	9.4072e-08	0.0821	0.0822	0.5388	0.2578	1.3117e-05	8.1809e-05	1.2101e-06	1.5648e-05	0.0974	0.0792	0.4107	0.4079		1.2971	1.6285	0.6871	0.7822		100	100	100	100		Amino Acid	Lysine Metabolism	100001721	1946-82-3	836	189.123
	75			N6-acetyllysine	LC/MS pos	36752	C02727	HMDB00206	92832					0.78	0.84	0.99	1.06		0.04	0.0227	0.9996	0.4533	0.6512	0.2877	0.0755	0.0618	0.2402	0.1655	0.7487	0.3389	0.7493	0.5576		1.227	1.212	0.9537	1.0149		100	100	100	100		Amino Acid	Lysine Metabolism	100001734	692-04-6	1140	189.123
	76			N-6-trimethyllysine	LC/MS pos	1498	C03793	HMDB01325	440120					1.27	1.1	1.25	1.08		0.2676	0.1074	0.3609	0.2373	0.235	0.158	0.1085	0.0827	0.9538	0.4865	0.141	0.1069	0.8419	0.6017		0.8939	1.1168	1.1396	1.2283		100	100	100	100		Amino Acid	Lysine Metabolism	189	23284-33-5	690	189.16
	79			2-aminoadipate	LC/MS pos	6146	C00956	HMDB00510	469					1.03	0.9	1.07	0.94		0.4836	0.1777	0.984	0.4503	0.223	0.1516	0.7074	0.3416	0.1775	0.1307	0.3933	0.22	0.3781	0.3888		1.0008	1.073	1.0266	0.9645		100	100	100	100		Amino Acid	Lysine Metabolism	381	542-32-5;1118-90-7	793.3	162.076
	81			2-oxoadipate	LC/MS polar	38347	C00322	HMDB00225	71					1.33	0.76	1.51	0.87		0.714	0.2464	0.224	0.1662	0.0133	0.0239	0.0421	0.0415	0.1195	0.0952	0.0104	0.0132	0.3313	0.3598		0.8382	1.269	1.1147	0.9702		100	100	100	100		Amino Acid	Lysine Metabolism	92	3184-35-8	2633.1	159.03
	82			glutarate (pentanedioate)	LC/MS polar	396	C00489	HMDB00661	743					0.96	0.75	1.09	0.85		0.0423	0.0235	0.716	0.3706	0.2361	0.158	0.5222	0.2728	0.0255	0.0286	0.5558	0.2812	0.2739	0.3164		1.1427	1.2491	1.0931	0.9306		100	100	100	100		Amino Acid	Lysine Metabolism	339	110-94-1	2900	131.035
	83			glutarylcarnitine (C5)	LC/MS pos	44664		HMDB13130	71464488					0.97	1.33	0.99	1.35		0.1967	0.0824	0.1519	0.1275	0.0505	0.057	0.6142	0.3086	0.0244	0.0276	0.6898	0.3205	0.0191	0.0695		0.9873	0.9726	0.9538	1.2896		100	100	100	100		Amino Acid	Lysine Metabolism	100001593	102636-82-8	1583.3	276.144
	84			3-methylglutarylcarnitine (1)	LC/MS pos	46547		HMDB00552	128145					1	1.36	0.64	0.88		0.0408	0.023	0.0002	0.0008	0.048	0.055	0.9574	0.4105	0.0059	0.009	0.0001	0.0004	0.1437	0.21		1.2003	0.7701	1.1945	1.0453		100	100	100	100		Amino Acid	Lysine Metabolism	100005849		1870	290.16
	90			pipecolate	LC/MS pos	1444	C00408	HMDB00070	849					0.9	1	0.74	0.84		0.3794	0.145	0.0004	0.0013	0.4001	0.2146	0.2268	0.1487	0.9785	0.4936	0.002	0.0033	0.0357	0.0939		1.1252	0.838	1.0078	0.8419		100	100	100	100		Amino Acid	Lysine Metabolism	1025	4043-87-2	1120	130.086
	97			N2,N6-diacetyllysine	LC/MS neg	48455			91827					0.74	0.59	1.46	1.16		0.0001	0.0002	0.0198	0.0265	0.1592	0.1262	0.0465	0.0442	0.0003	0.0009	0.0098	0.0129	0.4744	0.4395		1.1222	1.6356	0.8255	0.9574		100	100	100	100		Amino Acid	Lysine Metabolism	100006124	499-86-5	1604	229.119
	98		Phenylalanine and Tyrosine Metabolism	phenylalanine	LC/MS pos	64	C00079	HMDB00159	6140					1.23	1	1.16	0.94		0.0024	0.0022	0.2156	0.1637	0.0018	0.0064	4.9579e-05	0.0002	0.9386	0.4831	0.0025	0.0041	0.1356	0.2028		0.8536	0.9871	1.0505	0.9826		100	100	100	100		Amino Acid	Phenylalanine and Tyrosine Metabolism	460	63-91-2	2050	166.086
	99			N-acetylphenylalanine	LC/MS neg	33950	C03519	HMDB00512	74839					1.12	0.77	1.75	1.21		0.6087	0.216	0.0007	0.0018	0.0509	0.0571	0.291	0.1789	0.0813	0.0688	0.0003	0.0007	0.2168	0.265		0.8519	1.4918	0.9499	1.1507		100	100	100	100		Amino Acid	Phenylalanine and Tyrosine Metabolism	100001256	2018-61-3	2597	206.082
	102			phenylpyruvate	LC/MS neg	566	C00166	HMDB00205	997					1.09	0.77	1.58	1.12		0.5375	0.1922	0.0081	0.0136	0.0895	0.0842	0.429	0.24	0.103	0.0843	0.0029	0.0047	0.4465	0.4224		0.8598	1.3562	0.9336	1.0436		100	100	100	100		Amino Acid	Phenylalanine and Tyrosine Metabolism	241	156-06-9	2517.6	163.04
	103			phenyllactate (PLA)	LC/MS neg	22130	C05607	HMDB00779	3848					0.71	0.45	1.76	1.13		0.0002	0.0003	0.0263	0.0338	0.0424	0.0511	0.1309	0.0974	9.1302e-05	0.0004	0.0037	0.0057	0.8777	0.6057		1.207	2.1248	0.8582	0.966		100	100	100	100		Amino Acid	Phenylalanine and Tyrosine Metabolism	100000774	828-01-3	2208	165.056
	106			phenylacetate	LC/MS neg	15958	C07086	HMDB00209	999					1.91	2.02	0.51	0.54		0.0037	0.0031	0.013	0.0191	0.7162	0.3026	0.0186	0.022	0.0575	0.0535	0.1173	0.0929	0.0416	0.101		0.6631	0.3355	1.2633	0.6791		50	38	88	88		Amino Acid	Phenylalanine and Tyrosine Metabolism	100000011	103-82-2	2110.8	135.045
	107			4-hydroxyphenylacetate	LC/MS neg	541	C00642	HMDB00020	127					0.6	0.91	0.85	1.28		0.0134	0.0091	0.6067	0.3385	0.0852	0.0824	0.0041	0.0069	0.5502	0.3287	0.3792	0.2168	0.1144	0.1827		1.2187	1.0343	0.736	0.9391		88	100	100	100		Amino Acid	Phenylalanine and Tyrosine Metabolism	144	156-38-7	1361.1	151.04
	109			phenylacetylglycine	LC/MS pos	33945	C05598	HMDB00821	68144					1.25	2.55	0.35	0.72		4.3786e-05	8.6477e-05	4.6001e-06	2.8545e-05	0.0097	0.0187	0.1566	0.112	9.8411e-06	6.8636e-05	2.0199e-06	1.1241e-05	0.0509	0.1144		1.1571	0.406	1.4458	1.036		100	100	100	100		Amino Acid	Phenylalanine and Tyrosine Metabolism	100001275	500-98-1	3090	194.081
	111			tyrosine	LC/MS pos	1299	C00082	HMDB00158	6057					1.08	0.89	1.14	0.94		0.9844	0.3147	0.5877	0.3308	0.1225	0.1054	0.264	0.1686	0.2755	0.1866	0.1413	0.1069	0.4666	0.4334		0.9323	1.0616	1.0106	0.9461		100	100	100	100		Amino Acid	Phenylalanine and Tyrosine Metabolism	815	60-18-4	1516.3	182.081
	112			N-acetyltyrosine	LC/MS neg	32390		HMDB00866	68310					1	0.75	1.77	1.34		0.5057	0.1838	0.008	0.0136	0.2452	0.1609	0.7196	0.3462	0.1988	0.1433	0.008	0.011	0.2481	0.2924		0.9058	1.6061	0.9038	1.209		100	100	100	100		Amino Acid	Phenylalanine and Tyrosine Metabolism	100001104	537-55-3	1680	222.077
	120			4-hydroxyphenylpyruvate	LC/MS neg	1669	C01179	HMDB00707	979					0.98	0.84	1.06	0.91		0.4165	0.1569	0.9069	0.4307	0.6393	0.2866	0.8058	0.3725	0.3663	0.2355	0.8032	0.3558	0.6788	0.5356		1.0971	1.1606	1.0706	0.9774		100	100	100	100		Amino Acid	Phenylalanine and Tyrosine Metabolism	1141	156-39-8	1690.1	179.035
	121			3-(4-hydroxyphenyl)lactate	LC/MS neg	32197	C03672	HMDB00755	9378					1.11	0.76	1.25	0.86		0.2787	0.1114	0.6877	0.363	0.0112	0.0205	0.2643	0.1686	0.0116	0.0155	0.0356	0.0357	0.1137	0.1827		0.9373	1.1738	1.0393	0.8938		100	100	100	100		Amino Acid	Phenylalanine and Tyrosine Metabolism	240	6482-98-0	1379	181.051
	126			phenol sulfate	LC/MS neg	32553	C02180	HMDB60015	74426					0.57	0.06	1.88	0.19		0.0603	0.0311	0.0142	0.0201	0.5678	0.2676	0.3378	0.2012	0.0838	0.0704	0.1608	0.118	0.0319	0.089		3.0051	5.6494	1.7074	0.3238		100	100	100	100		Amino Acid	Phenylalanine and Tyrosine Metabolism	100001510	937-34-8	2156	172.991
	128			p-cresol sulfate	LC/MS neg	36103	C01468	HMDB11635	4615423					8.61	161.23	0.04	0.77		1.472e-12	1.8589e-10	1.0834e-05	5.7357e-05	0.0007	0.0034	3.2899e-06	2.7806e-05	7.505e-12	1.1898e-09	5.0044e-07	3.8061e-06	0.2929	0.3311		0.6319	0.026	5.4435	4.1921		100	100	100	100		Amino Acid	Phenylalanine and Tyrosine Metabolism	100001315	3233-57-7	2890	187.007
	134			o-cresol sulfate	LC/MS neg	36845			11615528					1.41	0.94	1.41	0.94		0.2357	0.0965	0.4289	0.2715	0.0836	0.082	0.0425	0.0416	0.6837	0.3893	0.077	0.0653	0.4891	0.4431		0.8249	1.1667	1.1672	1.0933		88	88	100	88		Amino Acid	Phenylalanine and Tyrosine Metabolism	100001806		2796	187.007
	141			3-methoxytyrosine	LC/MS pos	12017		HMDB01434	1670					0.64	0.77	0.86	1.04		3.2486e-06	9.6241e-06	0.4035	0.2593	0.2	0.1415	2.6231e-05	0.0001	0.0037	0.0066	0.1378	0.1062	0.7451	0.5568		1.293	1.115	0.825	0.8546		100	100	100	100		Amino Acid	Phenylalanine and Tyrosine Metabolism	1342	300-48-1	1771	212.092
	149			homovanillate sulfate	LC/MS neg	38349		HMDB11719	29981063					1.04	0.81	1.61	1.25		0.3728	0.1431	0.0004	0.0012	0.1076	0.095	0.5969	0.3018	0.0801	0.0684	0.0004	0.001	0.1103	0.1795		0.8534	1.3734	0.8833	1.1058		100	100	100	100		Amino Acid	Phenylalanine and Tyrosine Metabolism	100002250	38339-06-9	1047	261.007
	163			gentisate	LC/MS neg	18280	C00628	HMDB00152	3469					0.15	1.31	0.15	1.3		2.9808e-07	1.432e-06	2.147e-07	2.1097e-06	2.0462e-09	2.1571e-07	1.5299e-11	9.2757e-10	0.1713	0.1278	1.2709e-11	3.222e-10	0.199	0.2511		3.1046	0.4706	0.4745	0.6164		100	38	38	63		Amino Acid	Phenylalanine and Tyrosine Metabolism	100000447	490-79-9	1459.8	153.019
	164			phenylpropionylglycine	LC/MS pos	35434		HMDB00860	152323					2.22	1.49	0.55	0.37		0.0086	0.0062	0.0006	0.0016	0.3042	0.1822	0.0106	0.0144	0.2183	0.1543	0.054	0.0486	0.0016	0.0145		1.0767	0.5872	2.3917	0.8767		100	100	100	100		Amino Acid	Phenylalanine and Tyrosine Metabolism	100001591	56613-60-6	3625	208.097
	167			3-[3-(sulfooxy)phenyl]propanoic acid	LC/MS neg	45415			187488					0.12	1	0.02	0.19		9.5775e-09	9.4578e-08	0	2.8e-14	9.5775e-09	6.7308e-07	5.396e-12	6.3849e-10	1	0.4964	0	6e-15	2.2432e-07	2.0159e-05		1.9047	0.0427	0.2269	0.0427		100	0	100	0		Amino Acid	Phenylalanine and Tyrosine Metabolism	100005391	86321-32-6	1294	245.013
	169			3-hydroxy-3-phenylpropionate	LC/MS neg	43497			92959					1.26	0.86	1.07	0.73		0.5116	0.1852	0.2948	0.2038	0.2378	0.1582	0.1966	0.1321	0.7047	0.3988	0.9226	0.3849	0.1191	0.1894		0.8771	0.941	1.1038	0.8051		100	100	100	100		Amino Acid	Phenylalanine and Tyrosine Metabolism	100002482	2768-42-5	2024	165.056
	170			2-(4-hydroxyphenyl)propionate	LC/MS neg	35632	C03080	HMDB41683	102526					0.17	1	0.06	0.39		2.3708e-08	2.0068e-07	1.6e-13	5.815e-12	2.3708e-08	1.2496e-06	1.5678e-11	9.2757e-10	1	0.4964	1e-14	5.8e-13	0.0006	0.0074		1.6539	0.1075	0.2786	0.1075		100	0	100	0		Amino Acid	Phenylalanine and Tyrosine Metabolism	100001622	938-96-5	1797.3	165.056
	171			3-(3-hydroxyphenyl)propionate	LC/MS neg	35635	C11457	HMDB00375	91					0.04	0.96	0.01	0.16		7.4561e-10	1.2048e-08	0	2.8e-14	9.7497e-10	2.0555e-07	3.3e-13	7.8195e-11	0.9358	0.4831	0	6e-15	6.461e-06	0.0003		12.3489	0.0819	0.5064	0.0786		100	13	100	13		Amino Acid	Phenylalanine and Tyrosine Metabolism	100001624	621-54-5	1980	165.056
	172			3-(4-hydroxyphenyl)propionate	LC/MS neg	39587	C01744	HMDB02199	10394					0.11	0.65	0.23	1.35		3.5601e-05	7.1911e-05	0.106	0.0985	0.0461	0.0536	3.2096e-05	0.0002	0.0558	0.0523	0.0129	0.0156	0.7704	0.5618		5.3132	1.2091	0.5823	0.7849		100	100	100	100		Amino Acid	Phenylalanine and Tyrosine Metabolism	100002914	501-97-3	1670	165.056
	174			3-phenylpropionate (hydrocinnamate)	LC/MS neg	15749	C05629	HMDB00764	107					2.35	1.01	1.18	0.5		0.046	0.0253	0.1824	0.1454	0.1999	0.1415	0.023	0.0253	0.5879	0.3475	0.9697	0.3979	0.0684	0.1367		0.6348	0.747	1.4924	0.752		100	100	100	100		Amino Acid	Phenylalanine and Tyrosine Metabolism	100000010	501-52-0	2860	149.061
	179			thyroxine	LC/MS neg	2761	C01829	HMDB01918	5819					0.59	0.3	2.21	1.11		2.1647e-09	3.0444e-08	0.0002	0.0006	0.0029	0.0086	0.0007	0.0017	3.7411e-09	2.0874e-07	9.5161e-06	4.0967e-05	0.4396	0.4191		1.1891	2.6282	0.7073	0.7867		100	100	100	100		Amino Acid	Phenylalanine and Tyrosine Metabolism	1094	51-48-9	4808	775.679
	181			2-hydroxyphenylacetate	LC/MS polar	1432	C05852	HMDB00669	11970					0.9	0.8	1.29	1.15		0.0192	0.0123	0.006	0.0106	0.3798	0.2075	0.2693	0.1704	0.0239	0.0274	0.0108	0.0137	0.1527	0.2169		0.9872	1.2738	0.8861	1.0151		100	100	100	100		Amino Acid	Phenylalanine and Tyrosine Metabolism	235	614-75-5	858.6	151.04
	185			dopamine sulfate (2)	LC/MS neg	48407								0.98	0.58	1.69	1		0.0213	0.0134	0.0358	0.043	0.0367	0.0469	0.8639	0.3854	0.0028	0.0055	0.0043	0.0064	0.9936	0.6396		0.8572	1.4453	0.8368	0.8377		25	63	0	25		Amino Acid	Phenylalanine and Tyrosine Metabolism	100006361		1556.2	232.028
	186			p-cresol-glucuronide*	LC/MS neg	48841		HMDB11686	154035					10.62	76.61	0.04	0.28		7.6951e-11	2.2797e-09	2.5416e-07	2.3094e-06	0.0427	0.0511	4.8221e-06	3.5411e-05	2.163e-09	1.5085e-07	8.8928e-07	5.9678e-06	0.0029	0.0199		0.3893	0.0152	4.1334	1.1644		100	38	100	100		Amino Acid	Phenylalanine and Tyrosine Metabolism	100006191	17680-99-8	2420	283.082
	188			N-formylphenylalanine	LC/MS neg	48433			759256					0.55	0.65	0.89	1.04		0.0001	0.0002	0.7192	0.3706	0.5484	0.2604	0.0012	0.0025	0.0107	0.0148	0.4981	0.2589	0.8641	0.6035		1.2612	1.1192	0.6977	0.7279		100	88	38	13		Amino Acid	Phenylalanine and Tyrosine Metabolism	100006056	13200-85-6	2336	192.067
	191			4-hydroxycinnamate sulfate	LC/MS neg	48410			6070438					0.48	0.56	2.14	2.49		0.0185	0.0119	0.0012	0.0029	0.7905	0.3249	0.1255	0.0937	0.0602	0.0549	0.0104	0.0132	0.025	0.0774		1.0883	2.3332	0.5207	1.2955		100	100	100	100		Amino Acid	Phenylalanine and Tyrosine Metabolism	100006095	376374-66-2	1000	242.997
	192			3,4-dihydroxyphenylacetate sulfate	LC/MS neg	48736			193283					0.75	0.6	2.09	1.66		0.0489	0.0263	0.0029	0.0062	0.4255	0.2254	0.3841	0.2212	0.0522	0.0495	0.0076	0.0105	0.0939	0.1654		0.8408	1.7586	0.6344	1.0533		100	100	88	100		Amino Acid	Phenylalanine and Tyrosine Metabolism	100006254	38339-04-7	800	246.992
	193		Tryptophan Metabolism	tryptophan	LC/MS pos	54	C00078	HMDB00929	6305					1.35	0.92	1.54	1.05		0.0452	0.025	0.0003	0.0008	0.0018	0.0063	0.0005	0.0013	0.3477	0.2256	9.4903e-06	4.0967e-05	0.6091	0.5083		0.7592	1.1729	1.0252	1.076		100	100	100	100		Amino Acid	Tryptophan Metabolism	565	73-22-3	2440	205.097
	194			N-acetyltryptophan	LC/MS neg	33959	C03137	HMDB13713	700653					0.91	0.6	2.42	1.59		0.0073	0.0054	8.043e-08	1.077e-06	0.0283	0.0409	0.6848	0.3328	0.001	0.0024	2.7219e-07	2.1415e-06	0.0018	0.0145		0.8257	2	0.7523	1.1982		100	100	100	100		Amino Acid	Tryptophan Metabolism	100001254	1218-34-4	2630	245.093
	197			indolelactate	LC/MS pos	18349	C02043	HMDB00671	92904					0.95	0.62	2.03	1.31		1.2825e-05	3.11e-05	1.8529e-10	3.9283e-09	0.0001	0.0011	0.5408	0.2807	1.9155e-07	4.1107e-06	1.0082e-10	1.6431e-09	0.0008	0.0099		0.9048	1.8358	0.8622	1.133		100	100	100	100		Amino Acid	Tryptophan Metabolism	100000463	832-97-3	3514	206.081
	198			indoleacetate	LC/MS pos	27513	C00954	HMDB00197	802					0.9	0.98	0.85	0.92		0.53	0.1911	0.2042	0.1574	0.8692	0.3458	0.5751	0.2927	0.7423	0.4125	0.3087	0.1878	0.4295	0.4173		1.1337	0.9594	1.0208	0.9394		100	100	100	100		Amino Acid	Tryptophan Metabolism	100001034	6505-45-9	3766.3	176.071
	200			indolepropionate	LC/MS pos	32405		HMDB02302	3744					0.21	5.36	0.01	0.38		0.1739	0.0743	1.007e-10	2.329e-09	7.2559e-05	0.0008	0.0002	0.0006	0.0291	0.0316	4.5448e-11	9.4269e-10	0.0008	0.0096		8.3151	0.124	1.7355	0.665		100	100	100	100		Amino Acid	Tryptophan Metabolism	100001083	830-96-6	4147.9	190.086
	202			3-indoxyl sulfate	LC/MS neg	27672		HMDB00682	10258					0.49	0.68	0.44	0.6		2.9877e-06	9.4834e-06	1.1842e-07	1.4347e-06	0.1247	0.1064	1.4657e-05	8.1809e-05	0.0057	0.0087	1.4197e-06	8.306e-06	0.0006	0.0079		2.1939	0.9564	1.084	0.6515		100	100	100	100		Amino Acid	Tryptophan Metabolism	100000467	2642-37-7	2222.2	212.002
	203			kynurenine	LC/MS pos	15140	C00328	HMDB00684	161166					1.17	0.86	1.29	0.95		0.7933	0.266	0.2013	0.1557	0.0351	0.0468	0.0905	0.0719	0.1788	0.1312	0.0189	0.0213	0.5267	0.463		0.9046	1.169	1.0591	1.0022		100	100	100	100		Amino Acid	Tryptophan Metabolism	100000265	2922-83-0	1902.1	209.092
	204			kynurenate	LC/MS neg	1417	C01717	HMDB00715	3845					1.07	0.64	1.95	1.18		0.2212	0.0912	0.0125	0.0187	0.1076	0.095	0.7734	0.3639	0.0488	0.0468	0.0048	0.007	0.4816	0.4417		0.8336	1.6256	0.8885	1.0474		100	100	100	100		Amino Acid	Tryptophan Metabolism	98	492-27-3	2224	188.035
	206			anthranilate	LC/MS pos	4970	C00108	HMDB01123	227					0.99	0.71	1.45	1.04		0.0258	0.0155	0.0104	0.0163	0.0434	0.0517	0.8672	0.3858	0.0038	0.0066	0.0019	0.0032	0.6597	0.5305		0.9129	1.323	0.901	0.9339		100	100	100	100		Amino Acid	Tryptophan Metabolism	1258	118-92-3	3220	138.055
	210			xanthurenate	LC/MS pos	15679	C02470	HMDB00881	5699					0.95	0.53	1.43	0.8		0.1221	0.0559	0.7512	0.3786	0.1511	0.1216	0.934	0.4034	0.0386	0.0393	0.4206	0.2296	0.2145	0.2631		1.0767	1.5446	1.0223	0.813		100	100	100	100		Amino Acid	Tryptophan Metabolism	100000015	59-007	2655.6	206.045
	211			picolinate	LC/MS pos	1512	C10164	HMDB02243	1018					1.29	0.63	2.07	1		0.5435	0.194	0.0019	0.0042	0.003	0.0087	0.0733	0.0607	0.0108	0.0148	5.9048e-05	0.0002	0.8954	0.6143		0.79	1.6314	1.0215	1.0253		100	100	100	100		Amino Acid	Tryptophan Metabolism	1022	98-98-6	1117	124.039
	218			5-hydroxyindoleacetate	LC/MS pos	437	C05635	HMDB00763	1826					1.5	0.61	1.49	0.61		0.3112	0.1229	0.9896	0.4507	0.0012	0.0053	0.0803	0.0649	0.0028	0.0055	0.0171	0.0199	0.0164	0.0634		0.9311	1.3904	1.3926	0.844		100	100	100	100		Amino Acid	Tryptophan Metabolism	71	54-16-0	2559.9	192.066
	219			serotonin	LC/MS pos	2342	C00780	HMDB00259	5202					1.03	1.48	0.77	1.12		0.1416	0.0628	0.7921	0.3921	0.0374	0.0475	0.6382	0.316	0.0142	0.018	0.0941	0.0769	0.1856	0.2427		1.0289	0.7951	1.0567	1.18		100	100	100	100		Amino Acid	Tryptophan Metabolism	504	153-98-0	1654	177.102
	233			indole-3-carboxylic acid	LC/MS neg	38116	C19837	HMDB03320	69867					0.74	0.86	1.1	1.27		0.0685	0.0345	0.2325	0.1695	0.6429	0.2866	0.1058	0.0821	0.3218	0.2123	0.5992	0.2946	0.2423	0.2875		1.1599	1.2798	0.8615	1.0943		100	100	100	100		Amino Acid	Tryptophan Metabolism	100002185	771-50-6	1708.8	160.04
	234			C-glycosyltryptophan	LC/MS pos	48782			10981970					1.16	0.87	1.03	0.78		0.9672	0.3098	0.083	0.0826	0.0463	0.0536	0.1596	0.1134	0.1439	0.1112	0.8405	0.3662	0.0104	0.0452		0.9702	0.9993	1.1231	0.8732		100	100	100	100		Amino Acid	Tryptophan Metabolism	100006379	180509-18-6	1907	367.15
	235			N-acetylkynurenine (2)	LC/MS pos	48757								0.75	0.68	1.22	1.1		0.0032	0.0027	0.1564	0.1304	0.5952	0.2749	0.0681	0.0581	0.0128	0.0165	0.1696	0.122	0.521	0.463		1.0782	1.3101	0.8098	0.8944		100	100	100	100		Amino Acid	Tryptophan Metabolism	100006378		3114	251.103
	237		Leucine, Isoleucine and Valine Metabolism	leucine	LC/MS pos	60	C00123	HMDB00687	6106					0.99	0.84	1.06	0.9		0.1039	0.0488	0.6772	0.3604	0.0869	0.0834	0.948	0.4079	0.0211	0.0251	0.3467	0.2049	0.1319	0.2		1.0261	1.0831	1.0127	0.9141		100	100	100	100		Amino Acid	Leucine, Isoleucine and Valine Metabolism	397	61-90-5	1680.2	132.102
	238			N-acetylleucine	LC/MS neg	1587	C02710	HMDB11756	70912					0.57	0.56	0.8	0.8		0.0003	0.0005	0.0653	0.0689	0.7734	0.3205	0.0123	0.016	0.0045	0.0074	0.2595	0.1636	0.1295	0.199		1.6616	1.3367	0.9425	0.7534		100	100	100	100		Amino Acid	Leucine, Isoleucine and Valine Metabolism	1082	1188-21-2	2400	172.098
	240			4-methyl-2-oxopentanoate	LC/MS neg	22116	C00233	HMDB00695	70					1.3	1.2	0.96	0.88		0.005	0.0039	0.2551	0.1828	0.6513	0.2877	0.0196	0.0227	0.078	0.067	0.622	0.3013	0.2621	0.3049		0.9219	0.884	1.1978	1.0595		100	100	100	100		Amino Acid	Leucine, Isoleucine and Valine Metabolism	100000551	816-66-0	2170	129.056
	243			isovalerate	LC/MS neg	44656	C08262	HMDB00718	10430					1.18	0.91	1.05	0.81		0.5154	0.1862	0.1775	0.1429	0.0532	0.059	0.0687	0.0583	0.3444	0.224	0.6566	0.3089	0.023	0.0725		0.9295	0.98	1.0954	0.8927		88	88	100	88		Amino Acid	Leucine, Isoleucine and Valine Metabolism	100000708	503-74-2	1564	101.061
	244			isovalerylglycine	LC/MS neg	35107		HMDB00678	546304					0.72	0.93	0.61	0.78		0.0455	0.0251	0.0003	0.001	0.3018	0.1813	0.0344	0.0352	0.4678	0.2874	0.0011	0.0021	0.0397	0.0992		1.4316	0.87	1.037	0.811		100	100	100	100		Amino Acid	Leucine, Isoleucine and Valine Metabolism	100001452	16284-60-9	1950	158.082
	245			isovalerylcarnitine	LC/MS pos	34407		HMDB00688	6426851					1.12	0.84	1.13	0.85		0.7833	0.2642	0.6514	0.3509	0.0247	0.0377	0.1494	0.1084	0.0712	0.0629	0.186	0.1298	0.0551	0.118		0.9356	1.0589	1.0486	0.8928		100	100	100	100		Amino Acid	Leucine, Isoleucine and Valine Metabolism	100001393	31023-24-2	2504.9	246.17
	247			3-methylcrotonylglycine	LC/MS pos	31940		HMDB00459	169485					0.9	0.97	0.68	0.73		0.3197	0.1255	7.9168e-06	4.4759e-05	0.4921	0.2424	0.237	0.1536	0.8243	0.4439	0.0002	0.0005	0.0022	0.0166		1.1689	0.7932	1.0504	0.7695		100	100	100	100		Amino Acid	Leucine, Isoleucine and Valine Metabolism	100001149	33008-07-0	2573.6	158.081
	248			beta-hydroxyisovalerate	LC/MS neg	12129		HMDB00754	69362					1.26	1.07	1.17	0.99		0.1116	0.0519	0.4461	0.2782	0.3281	0.1905	0.0726	0.0607	0.6506	0.3765	0.2215	0.1473	0.8761	0.6057		0.8924	1.0424	1.1263	1.1186		100	100	100	100		Amino Acid	Leucine, Isoleucine and Valine Metabolism	1442	625-08-1	1027	117.056
	249			beta-hydroxyisovaleroylcarnitine	LC/MS pos	35433								0.66	0.74	0.96	1.09		2.044e-06	7.3297e-06	0.7623	0.3831	0.3383	0.1928	3.6209e-05	0.0002	0.0015	0.0033	0.6399	0.3067	0.3733	0.3871		1.2115	1.1652	0.7945	0.864		100	100	100	100		Amino Acid	Leucine, Isoleucine and Valine Metabolism	100001594	99159-87-2	1701	262.165
	252			3-methylglutaconate	LC/MS polar	38667		HMDB00522	1551553					1.04	1.34	0.94	1.22		0.4166	0.1569	0.6651	0.3562	0.3148	0.1854	0.8891	0.3911	0.2019	0.1448	0.6818	0.3184	0.3104	0.3424		0.9941	0.9371	1.0338	1.2576		100	100	100	100		Amino Acid	Leucine, Isoleucine and Valine Metabolism	100002458	5746-90-7	2579.6	143.035
	256			alpha-hydroxyisovalerate	LC/MS neg	33937		HMDB00407	99823					1.18	0.43	2.58	0.95		0.0013	0.0013	0.0002	0.0008	5.9537e-05	0.0008	0.426	0.24	2.612e-06	2.8027e-05	7.6871e-07	5.3149e-06	0.7276	0.5536		0.8474	2.1845	0.9975	0.945		100	100	100	100		Amino Acid	Leucine, Isoleucine and Valine Metabolism	100001300	600-37-3	1126	117.056
	258			methylsuccinate	LC/MS polar	15745		HMDB01844	10349					0.77	0.83	0.68	0.73		0.0537	0.0281	0.0041	0.0083	0.8757	0.3477	0.1358	0.1007	0.2	0.1438	0.0276	0.029	0.0448	0.1054		1.5015	1.02	1.1607	0.8417		100	100	100	100		Amino Acid	Leucine, Isoleucine and Valine Metabolism	2051	498-21-5	2800	131.035
	266			isoleucine	LC/MS pos	1125	C00407	HMDB00172	6306					0.94	0.82	1.02	0.89		0.0505	0.0266	0.5009	0.2963	0.1448	0.1184	0.7035	0.3405	0.0183	0.0222	0.5676	0.2842	0.1341	0.2026		1.0689	1.0929	1.0075	0.896		100	100	100	100		Amino Acid	Leucine, Isoleucine and Valine Metabolism	376	73-32-5	1599	132.102
	268			N-acetylisoleucine	LC/MS neg	33967			2802421					0.67	0.51	1.26	0.98		0.0004	0.0006	0.503	0.2963	0.2132	0.1484	0.0662	0.0572	0.0009	0.0022	0.1783	0.1256	0.6771	0.5356		1.3385	1.6921	0.8908	0.8712		100	100	100	100		Amino Acid	Leucine, Isoleucine and Valine Metabolism	100001276	3077-46-1	2325	172.098
	269			3-methyl-2-oxovalerate	LC/MS neg	15676	C00671	HMDB03736	47					1.23	1.1	0.97	0.87		0.0147	0.0098	0.1582	0.1311	0.3011	0.1813	0.0153	0.0187	0.2831	0.1912	0.7814	0.3503	0.0876	0.1569		0.9345	0.9088	1.154	0.9997		100	100	100	100		Amino Acid	Leucine, Isoleucine and Valine Metabolism	100000036	1460-34-0;51829-07-3	2064.2	129.056
	270			2-methylbutyrylcarnitine (C5)	LC/MS pos	45095		HMDB00378	6426901					0.87	0.73	1.07	0.91		0.0117	0.0081	0.8065	0.3976	0.2698	0.1703	0.2763	0.173	0.0116	0.0155	0.5395	0.2748	0.3399	0.3669		1.1242	1.2004	0.9725	0.8807		100	100	100	100		Amino Acid	Leucine, Isoleucine and Valine Metabolism	100001509	31023-25-3	2465	246.17
	271			2-methylbutyrylglycine	LC/MS pos	31928		HMDB00339	193872					1.1	0.98	0.87	0.77		0.4785	0.1768	0.0628	0.0671	0.6421	0.2866	0.4079	0.2326	0.8618	0.4571	0.3082	0.1878	0.0998	0.1694		1.0045	0.8774	1.1056	0.8563		100	100	100	100		Amino Acid	Leucine, Isoleucine and Valine Metabolism	100001155	52320-67-9	2582.2	160.097
	272			tiglyl carnitine	LC/MS pos	35428		HMDB02366	22833596					0.74	0.65	1.13	0.98		0.0008	0.0009	0.6108	0.3401	0.5082	0.2474	0.0373	0.0375	0.004	0.0069	0.4092	0.2272	0.9132	0.6184		1.1339	1.2851	0.842	0.8291		100	100	100	100		Amino Acid	Leucine, Isoleucine and Valine Metabolism	100001597	64191-86-2	2354	244.154
	273			tigloylglycine	LC/MS pos	1598		HMDB00959	6441567					0.79	1.29	0.36	0.6		0.9164	0.2997	3.2858e-06	2.1435e-05	0.044	0.0519	0.1676	0.1166	0.1284	0.1006	5.6838e-06	2.7593e-05	0.0148	0.0598		1.5939	0.5794	1.2527	0.7469		100	100	100	100		Amino Acid	Leucine, Isoleucine and Valine Metabolism	1161	35842-45-6	2518	158.081
	275			2-hydroxy-3-methylvalerate	LC/MS neg	36746		HMDB00317	164623					1.1	0.32	3.64	1.07		0.0002	0.0003	1.9312e-06	1.3279e-05	4.0755e-05	0.0006	0.6715	0.3283	5.5983e-07	9.7613e-06	2.3839e-08	3.0218e-07	0.4347	0.4181		0.8641	3.1441	0.9493	1.0178		100	100	100	100		Amino Acid	Leucine, Isoleucine and Valine Metabolism	100001541	488-15-3	1800	131.071
	276			3-hydroxy-2-ethylpropionate	LC/MS polar	32397		HMDB00396	188979					0.85	0.85	0.98	0.98		0.0025	0.0022	0.7158	0.3706	0.9613	0.3672	0.028	0.0296	0.024	0.0274	0.8233	0.3612	0.7704	0.5618		1.1146	1.088	0.946	0.9275		100	100	100	100		Amino Acid	Leucine, Isoleucine and Valine Metabolism	100001170	4374-62-3	1443.3	117.056
	277			ethylmalonate	LC/MS polar	15765		HMDB00622	11756					1.2	1.13	0.8	0.75		0.0536	0.0281	0.0005	0.0015	0.523	0.2513	0.0702	0.0592	0.3416	0.2227	0.0287	0.0298	0.0032	0.0215		1.0609	0.8486	1.2763	0.9623		100	100	100	100		Amino Acid	Leucine, Isoleucine and Valine Metabolism	2054	601-75-2	2785	131.035
	278			valine	LC/MS pos	1649	C00183	HMDB00883	6287					0.99	0.87	1.08	0.95		0.2598	0.1045	0.7887	0.3921	0.1664	0.1292	0.8497	0.3804	0.0798	0.0683	0.2417	0.1562	0.4229	0.4145		0.9931	1.0704	0.9867	0.9343		100	100	100	100		Amino Acid	Leucine, Isoleucine and Valine Metabolism	566	72-18-4	1042.1	118.086
	279			N-acetylvaline	LC/MS neg	1591		HMDB11757	66789					0.61	0.57	0.98	0.92		0.0001	0.0002	0.4753	0.2883	0.5833	0.2709	0.0107	0.0145	0.0015	0.0033	0.9059	0.3821	0.3736	0.3871		1.4112	1.3896	0.8656	0.7934		100	100	100	100		Amino Acid	Leucine, Isoleucine and Valine Metabolism	1084	96-81-1	1704	158.082
	281			3-methyl-2-oxobutyrate	LC/MS neg	44526	C00141	HMDB00019	49					1.08	1.01	0.95	0.89		0.4803	0.1771	0.0719	0.0743	0.4814	0.2405	0.321	0.1938	0.9991	0.4964	0.4202	0.2296	0.0783	0.1477		1.0197	0.9665	1.0972	0.9755		100	100	100	100		Amino Acid	Leucine, Isoleucine and Valine Metabolism	100000936	3715-29-5	1465	115.04
	282			isobutyrylcarnitine	LC/MS pos	33441		HMDB00736	168379					0.99	0.8	0.89	0.72		0.0206	0.013	3.4472e-05	0.0002	0.0412	0.0511	0.8257	0.3772	0.003	0.0056	0.0593	0.0524	2.8319e-05	0.0009		1.0804	0.9646	1.0655	0.7693		100	100	100	100		Amino Acid	Leucine, Isoleucine and Valine Metabolism	100001055	25518-49-4	1955.1	232.154
	283			isobutyrylglycine	LC/MS pos	35437		HMDB00730	10855600					0.73	0.79	0.98	1.06		0.0027	0.0024	0.8136	0.4004	0.6248	0.2833	0.0124	0.0161	0.0583	0.0536	0.6085	0.2973	0.8573	0.6035		1.1923	1.1656	0.8694	0.9173		100	100	100	100		Amino Acid	Leucine, Isoleucine and Valine Metabolism	100001590	15926-18-8	2009	146.081
	284			3-hydroxyisobutyrate	LC/MS polar	1549	C06001	HMDB00336	87					0.85	0.8	1.07	1		0.0411	0.023	0.7081	0.3692	0.7059	0.3007	0.2237	0.1471	0.0854	0.0713	0.5955	0.2935	0.9983	0.6396		1.0614	1.1384	0.9039	0.9053		100	100	100	100		Amino Acid	Leucine, Isoleucine and Valine Metabolism	111	2068-83-9	1619.1	103.04
	285			alpha-hydroxyisocaproate	LC/MS neg	22132	C03264	HMDB00746	83697					1.04	0.56	1.36	0.73		0.0002	0.0004	0.9277	0.4361	0.0001	0.0009	0.8329	0.378	1.234e-06	1.5648e-05	0.003	0.0048	0.0042	0.0253		0.969	1.3197	1.0103	0.7392		100	100	100	100		Amino Acid	Leucine, Isoleucine and Valine Metabolism	100000706	10303-64-7	1840	131.071
	290		Methionine, Cysteine, SAM and Taurine Metabolism	methionine	LC/MS pos	1302	C00073	HMDB00696	6137					0.88	1	1.1	1.25		0.4688	0.174	0.0251	0.0327	0.4654	0.2359	0.306	0.1867	0.9968	0.4964	0.2597	0.1636	0.0365	0.0939		0.9952	1.0935	0.8791	1.095		100	100	100	100		Amino Acid	Methionine, Cysteine, SAM and Taurine Metabolism	415	63-68-3	1250	150.058
	291			N-acetylmethionine	LC/MS neg	1589	C02712	HMDB11745	448580					0.55	0.76	0.87	1.19		0.0002	0.0003	0.9366	0.4368	0.1772	0.1332	0.0004	0.001	0.0481	0.0467	0.3643	0.2126	0.3093	0.3424		1.4326	1.241	0.7895	0.937		100	100	100	100		Amino Acid	Methionine, Cysteine, SAM and Taurine Metabolism	1083	65-82-7	1787	190.054
	292			N-formylmethionine	LC/MS neg	2829	C03145	HMDB01015	439750					0.66	0.92	0.61	0.85		0.016	0.0106	0.0014	0.0033	0.1348	0.1123	0.0071	0.0106	0.4748	0.2911	0.0012	0.0024	0.1663	0.2273		1.467	0.8929	0.9677	0.8229		100	100	100	100		Amino Acid	Methionine, Cysteine, SAM and Taurine Metabolism	194	4289-98-9	1543.8	176.039
	295			methionine sulfoxide	LC/MS pos	18374	C02989	HMDB02005	158980					0.73	0.84	1.02	1.19		0.0997	0.0473	0.5112	0.2983	0.6835	0.2977	0.146	0.1067	0.3692	0.2367	0.859	0.3691	0.4525	0.4256		1.2731	1.3024	0.9239	1.1		100	100	100	100		Amino Acid	Methionine, Cysteine, SAM and Taurine Metabolism	100000039	3226-65-1	741.1	166.053
	298			S-adenosylhomocysteine (SAH)	LC/MS neg	42382	C00021	HMDB00939	439155					2.67	1.16	1.14	0.5		0.0291	0.0173	0.0301	0.0377	0.0087	0.0174	0.0011	0.0024	0.7153	0.4039	0.7074	0.3249	0.0012	0.0115		0.7953	0.9054	2.1219	1.0517		100	100	100	100		Amino Acid	Methionine, Cysteine, SAM and Taurine Metabolism	197	979-92-0	1832.4	383.114
	303			alpha-ketobutyrate	LC/MS polar	4968	C00109	HMDB00005	58					1.25	0.81	0.74	0.48		0.8157	0.2717	0.0089	0.0147	0.1818	0.1354	0.2662	0.1693	0.4294	0.2676	0.3157	0.1911	0.0062	0.0311		0.9182	0.6836	1.1521	0.5568		63	50	88	50		Amino Acid	Methionine, Cysteine, SAM and Taurine Metabolism	796	600-18-0	940	101.024
	305			2-aminobutyrate	LC/MS pos	42374	C02261	HMDB00650	439691					1.07	1.08	0.87	0.88		0.0711	0.0355	0.0096	0.0155	0.9306	0.3594	0.2164	0.143	0.1758	0.1301	0.0521	0.0479	0.0672	0.1349		1.0342	0.9041	1.1077	0.9787		100	100	100	100		Amino Acid	Methionine, Cysteine, SAM and Taurine Metabolism	1128	1492-24-6	766.7	104.071
	306			2-hydroxybutyrate (AHB)	GC/MS	21044	C05984	HMDB00008	440864					1.22	0.82	1.13	0.76		0.9874	0.3147	0.4031	0.2593	0.0141	0.0251	0.0732	0.0607	0.0765	0.0659	0.2216	0.1473	0.0208	0.0708		0.9244	1.0484	1.1313	0.8606		100	100	100	100		Amino Acid	Methionine, Cysteine, SAM and Taurine Metabolism	100000933	3347-90-8	1169.4	131
	310			S-methylcysteine	LC/MS pos	39592		HMDB02108	24417					1.32	1.47	0.67	0.75		9.2155e-07	3.9002e-06	2.1737e-07	2.1097e-06	0.3106	0.1845	0.0009	0.0021	1.8213e-05	0.0001	6.3477e-06	3.0173e-05	0.0003	0.0051		0.9909	0.6646	1.3071	0.9796		100	100	100	100		Amino Acid	Methionine, Cysteine, SAM and Taurine Metabolism	100002749	1187-84-4	848	119.016
	312			cysteine s-sulfate	LC/MS neg	22176	C05824	HMDB00731	115015					1.68	1.1	1.29	0.85		0.0036	0.003	0.7846	0.3914	0.0358	0.0468	0.0007	0.0017	0.498	0.3015	0.0902	0.0746	0.1832	0.2404		0.7579	0.9757	1.2746	1.0771		100	100	100	100		Amino Acid	Methionine, Cysteine, SAM and Taurine Metabolism	100000808	1637-71-4	640.9	199.969
	316			hypotaurine	LC/MS polar	590	C00519	HMDB00965	107812					0.42	0.53	0.6	0.76		3.0683e-07	1.4353e-06	0.0049	0.0094	0.1956	0.1412	4.6517e-06	3.5411e-05	0.0008	0.002	0.0044	0.0065	0.2311	0.2781		1.8144	1.0841	0.758	0.574		100	100	100	100		Amino Acid	Methionine, Cysteine, SAM and Taurine Metabolism	358	300-84-5	2763.4	108.012
	317			taurine	LC/MS polar	2125	C00245	HMDB00251	1123					0.96	0.86	1.1	0.99		0.0782	0.0387	0.467	0.2863	0.4366	0.229	0.4686	0.2527	0.0748	0.0649	0.2896	0.1786	0.9711	0.6357		0.989	1.084	0.9465	0.933		100	100	100	100		Amino Acid	Methionine, Cysteine, SAM and Taurine Metabolism	512	107-35-7	2120	124.007
	318			N-acetyltaurine	LC/MS neg	48187			159864					0.73	0.8	1.04	1.14		0.0017	0.0017	0.3609	0.2373	0.5819	0.2708	0.0081	0.0116	0.0486	0.0468	0.7946	0.3548	0.3024	0.3408		1.1735	1.2183	0.8571	0.98		100	100	100	100		Amino Acid	Methionine, Cysteine, SAM and Taurine Metabolism	100005466		800	166.018
	325		Urea cycle; Arginine and Proline Metabolism	arginine	LC/MS pos	1638	C00062	HMDB00517	232					1.1	0.98	1.19	1.06		0.3275	0.1282	0.0077	0.0132	0.1156	0.1003	0.0744	0.0614	0.6607	0.38	0.0036	0.0056	0.3859	0.393		0.8866	1.0593	0.9784	1.0343		100	100	100	100		Amino Acid	Urea cycle; Arginine and Proline Metabolism	231	1119-34-2	700	175.119
	326			urea	LC/MS pos	1670	C00086	HMDB00294	1176					0.72	0.54	1.28	0.97		1.1567e-05	2.8555e-05	0.2128	0.1621	0.0907	0.085	0.0176	0.0214	2.7678e-05	0.0002	0.0412	0.0398	0.7384	0.5548		1.2587	1.612	0.9024	0.8725		100	100	100	100		Amino Acid	Urea cycle; Arginine and Proline Metabolism	533	57-13-6	739	121.072
	327			ornithine	LC/MS pos	1493	C00077	HMDB03374	6262					1.05	0.97	1.14	1.05		0.7925	0.266	0.1449	0.1229	0.4462	0.2327	0.469	0.2527	0.7225	0.4064	0.1193	0.0942	0.6114	0.5087		0.9302	1.0614	0.978	1.0296		100	100	100	100		Amino Acid	Urea cycle; Arginine and Proline Metabolism	444	3184-13-2	614	133.097
	328			proline	LC/MS pos	1898	C00148	HMDB00162	145742					0.9	1.03	0.95	1.1		0.6489	0.227	0.7507	0.3786	0.452	0.2341	0.3945	0.2266	0.8322	0.4464	0.757	0.342	0.45	0.4245		1.0763	1.0273	0.9659	1.0608		100	100	100	100		Amino Acid	Urea cycle; Arginine and Proline Metabolism	480	147-85-3	805	116.071
	329			citrulline	LC/MS pos	2132	C00327	HMDB00904	9750					0.82	0.87	1.33	1.4		0.0042	0.0034	2.2358e-06	1.4969e-05	0.6976	0.2994	0.0193	0.0226	0.064	0.0576	0.0005	0.0012	0.0001	0.0025		0.9346	1.2415	0.7702	1.0767		100	100	100	100		Amino Acid	Urea cycle; Arginine and Proline Metabolism	391	372-75-8	730.3	176.103
	332			homocitrulline	LC/MS pos	22138	C02427	HMDB00679	65072					0.62	0.7	0.89	1.02		3.0802e-05	6.3665e-05	0.3572	0.2369	0.2784	0.1732	0.0002	0.0006	0.0109	0.0148	0.1599	0.1179	0.9057	0.6184		1.4877	1.3229	0.9152	0.9325		100	100	100	100		Amino Acid	Urea cycle; Arginine and Proline Metabolism	100000963	1190-49-4	821.7	190.119
	336			dimethylarginine (SDMA + ADMA)	LC/MS pos	36808	C03626	HMDB01539	123831					1.04	0.92	1.06	0.94		0.4521	0.1688	0.9926	0.451	0.0748	0.0761	0.448	0.2465	0.0752	0.0649	0.2034	0.1386	0.199	0.2511		0.989	1.0513	1.0276	0.9681		100	100	100	100		Amino Acid	Urea cycle; Arginine and Proline Metabolism	100001810	102783-24-4	810	203.15
	337			N-acetylarginine	LC/MS pos	33953	C02562	HMDB04620	67427					0.64	0.68	1.09	1.15		0.0004	0.0005	0.2602	0.1854	0.8313	0.335	0.0059	0.0092	0.0122	0.0161	0.5143	0.2638	0.343	0.3691		1.2475	1.3596	0.7985	0.9206		100	100	100	100		Amino Acid	Urea cycle; Arginine and Proline Metabolism	100001266	155-84-0	1116	217.13
	340			N-delta-acetylornithine	LC/MS pos	43249			9920500					0.6	0.6	0.79	0.79		5.1536e-08	3.6642e-07	0.001	0.0025	0.8859	0.3491	2.0993e-05	0.0001	1.1999e-05	7.7848e-05	0.0188	0.0213	0.0117	0.0493		1.4992	1.1828	0.906	0.7131		100	100	100	100		Amino Acid	Urea cycle; Arginine and Proline Metabolism	100004523		887	175.108
	341			N2,N5-diacetylornithine	LC/MS neg	43591			10398396					0.59	0.5	0.98	0.84		1.9317e-10	4.2921e-09	0.1081	0.1	0.1617	0.1267	2.8662e-06	2.6089e-05	1.4397e-08	6.6776e-07	0.876	0.3738	0.037	0.0939		1.319	1.293	0.7771	0.6511		100	100	100	100		Amino Acid	Urea cycle; Arginine and Proline Metabolism	100004575	39825-23-5	1367	215.104
	344			N-methylproline	LC/MS pos	37431			557					0.58	0.97	0.32	0.55		0.65	0.227	0.0051	0.0096	0.6969	0.2994	0.5516	0.2844	0.9636	0.4897	0.0219	0.0239	0.0719	0.1411		2.0169	0.6535	1.1628	0.6348		50	50	88	88		Amino Acid	Urea cycle; Arginine and Proline Metabolism	100001956	475-11-6	831	130.086
	346			trans-4-hydroxyproline	LC/MS pos	32306	C01157	HMDB00725	5810					0.7	1.02	0.95	1.39		0.0061	0.0046	0.0312	0.0385	0.0028	0.0085	0.0001	0.0005	0.8275	0.4448	0.4828	0.2538	0.0005	0.0072		1.0787	1.0227	0.7526	1.0463		100	100	100	100		Amino Acid	Urea cycle; Arginine and Proline Metabolism	1001	51-35-4	685	132.066
	348			pro-hydroxy-pro	LC/MS pos	35127		HMDB06695	11673055					0.83	0.83	0.76	0.76		0.0851	0.0418	0.004	0.0083	0.9807	0.3705	0.2112	0.1408	0.2235	0.1566	0.0337	0.034	0.0363	0.0939		1.1771	0.8961	0.9828	0.7455		100	100	100	100		Amino Acid	Urea cycle; Arginine and Proline Metabolism	100001167	18684-24-7	950	229.118
	352			N-acetylcitrulline	LC/MS neg	48434	C15532	HMDB00856	656979					0.81	0.62	1.6	1.22		0.0009	0.001	0.0019	0.0042	0.1303	0.1103	0.1401	0.103	0.0009	0.0022	0.0015	0.0027	0.1961	0.2491		1.0412	1.6687	0.8439	1.0311		100	100	100	100		Amino Acid	Urea cycle; Arginine and Proline Metabolism	100001577	33965-42-3	940	216.099
	353		Creatine Metabolism	creatine	LC/MS pos	27718	C00300	HMDB00064	586					1.32	1.01	1.16	0.89		0.014	0.0095	0.708	0.3692	0.0186	0.0309	0.0012	0.0024	0.9325	0.4831	0.0515	0.0475	0.145	0.2107		0.8421	0.9749	1.1078	0.9885		100	100	100	100		Amino Acid	Creatine Metabolism	1221	57-00-1	771	132.077
	354			creatinine	LC/MS pos	513	C00791	HMDB00562	588					1	0.75	1.43	1.06		0.0344	0.02	0.0034	0.0071	0.0235	0.0367	0.9041	0.3948	0.0029	0.0055	0.0005	0.0011	0.5749	0.4897		0.9634	1.3769	0.9673	1.0292		100	100	100	100		Amino Acid	Creatine Metabolism	275	60-27-5	730.8	114.066
	356			creatine phosphate	LC/MS polar	33951	C02305	HMDB01511	587					1	1.04	0.94	0.98		0.7156	0.2465	0.5539	0.3174	0.9757	0.3705	0.8132	0.3751	0.7801	0.4259	0.6595	0.3096	0.6908	0.5386		0.9801	0.9235	0.9803	0.9574		100	100	100	100		Amino Acid	Creatine Metabolism	100000112	922-32-7	3831	210.029
	359			guanidinoacetate	LC/MS polar	43802	C00581	HMDB00128	763					0.74	0.72	1.44	1.38		0.0003	0.0004	0.0002	0.0006	0.8847	0.3491	0.0092	0.0127	0.0055	0.0085	0.0039	0.006	0.0066	0.0318		1.0273	1.4766	0.7649	1.0579		100	100	100	100		Amino Acid	Creatine Metabolism	344	352-97-6	2884	116.047
	362		Polyamine Metabolism	acisoga	LC/MS pos	43258			129397					1.87	0.93	2.12	1.06		0.0061	0.0046	6.4556e-05	0.0003	0.0013	0.0053	7.7072e-05	0.0003	0.6721	0.385	2.788e-06	1.5146e-05	0.4361	0.4181		0.5786	1.2265	1.0795	1.1457		100	100	100	100		Amino Acid	Polyamine Metabolism	100004541	106692-36-8	2290	185.128
	364			spermine	LC/MS pos	603	C00750	HMDB01256	1103					8.99	1.09	4.96	0.6		0.0043	0.0034	0.8167	0.4011	0.0006	0.0033	3.2426e-05	0.0002	0.5892	0.3475	0.007	0.0099	0.0155	0.061		0.1881	0.9327	1.6913	1.0211		13	100	100	75		Amino Acid	Polyamine Metabolism	507	71-44-3	500.4	203.223
	365			spermidine	LC/MS pos	485	C00315	HMDB01257	1102					5.02	1.15	2.32	0.53		0.0007	0.0008	0.8646	0.4174	9.5395e-05	0.0009	2.2615e-06	2.327e-05	0.614	0.3606	0.0044	0.0066	0.0024	0.0172		0.4648	1.0774	2.3314	1.2349		100	100	100	100		Amino Acid	Polyamine Metabolism	50	124-20-9	533.5	146.165
	366			5-methylthioadenosine (MTA)	LC/MS pos	1419	C00170	HMDB01173	439176					0.9	0.82	1.13	1.03		0.0183	0.0118	0.379	0.2472	0.4469	0.2327	0.23	0.1504	0.028	0.0311	0.2489	0.1604	0.9316	0.6218		1.0196	1.1479	0.9165	0.941		100	100	100	100		Amino Acid	Polyamine Metabolism	212	2457-80-9	2444.9	298.097
	369			N-acetylputrescine	LC/MS pos	37496	C02714	HMDB02064	122356					0.61	0.52	1.67	1.42		0.0015	0.0015	0.0268	0.0343	0.5092	0.2474	0.0527	0.0479	0.0061	0.0091	0.0425	0.0408	0.248	0.2924		1.4152	2.3648	0.8626	1.2283		100	100	100	100		Amino Acid	Polyamine Metabolism	192	18233-70-0	840	131.118
	370			4-acetamidobutanoate	LC/MS pos	1558	C02946	HMDB03681	18189					0.7	0.51	1.97	1.43		2.5602e-06	8.2742e-06	1.133e-05	5.7652e-05	0.0737	0.0754	0.0083	0.0116	7.7188e-06	5.8199e-05	2.2215e-05	8.3092e-05	0.0206	0.0708		1.0357	2.0383	0.7248	1.0381		100	100	100	100		Amino Acid	Polyamine Metabolism	1113	3025-96-5	1721.3	146.081
	375		Guanidino and Acetamido Metabolism	4-guanidinobutanoate	LC/MS pos	15681	C01035	HMDB03464	500					0.4	0.36	1.27	1.16		3.0055e-08	2.3227e-07	0.2191	0.1651	0.7434	0.311	1.9932e-05	0.0001	5.5724e-06	4.9234e-05	0.2712	0.169	0.5177	0.463		1.5233	1.9304	0.6021	0.6958		100	100	100	100		Amino Acid	Guanidino and Acetamido Metabolism	100000096	463-003;463-00-3	1150	146.092
	376			guanidinosuccinate	LC/MS pos	32446	C03139	HMDB03157	97856					0.82	1	0.82	1		0.0882	0.0427	0.0882	0.086	0.0882	0.0838	0.0186	0.022	1	0.4964	0.0186	0.0212	1	0.6396		0.8519	0.6985	0.6985	0.6985		50	0	0	0		Amino Acid	Guanidino and Acetamido Metabolism	100001212	6133-30-8	742.9	176.067
	378		Glutathione Metabolism	glutathione, oxidized (GSSG)	LC/MS pos	38783	C00127	HMDB03337	65359					0.59	0.78	0.79	1.04		0.0016	0.0016	0.1163	0.1039	0.9454	0.3637	0.0225	0.0251	0.018	0.0219	0.282	0.1744	0.2422	0.2875		1.4764	1.1618	0.8679	0.9004		100	100	100	100		Amino Acid	Glutathione Metabolism	448	103239-24-3	1512	307.083
	380			cysteine-glutathione disulfide	LC/MS pos	46734		HMDB00656	4247235					0.81	1	0.6	0.74		0.0539	0.0281	2.1944e-08	3.1016e-07	0.0689	0.0712	0.0101	0.0138	0.9326	0.4831	2.3025e-07	1.9457e-06	0.0003	0.0051		1.5193	0.9104	1.2296	0.9077		100	100	100	100		Amino Acid	Glutathione Metabolism	100001437	13081-14-6	824	427.095
	381			S-methylglutathione	LC/MS pos	33944	C11347		3605667					0.59	1.11	0.71	1.32		0.0132	0.009	0.1603	0.132	0.373	0.2053	0.018	0.0216	0.2282	0.1588	0.1081	0.0862	0.707	0.5442		1.4242	1.0059	0.847	1.1194		100	100	100	100		Amino Acid	Glutathione Metabolism	100001259	2922-56-7	1600	322.107
	385			5-oxoproline	LC/MS neg	1494	C01879	HMDB00267	7405					1.26	0.92	1.04	0.76		0.1997	0.0833	0.0328	0.0401	0.0052	0.0127	0.0047	0.0077	0.2353	0.1629	0.5842	0.2897	0.0009	0.01		0.9736	1.0105	1.2283	0.9295		100	100	100	100		Amino Acid	Glutathione Metabolism	1021	98-79-3	738.5	128.035
	386			ophthalmate	LC/MS pos	34592		HMDB05765	7018721					0.6	0.6	0.59	0.59		0.0004	0.0005	9.2439e-05	0.0004	0.7648	0.3187	0.0143	0.018	0.0051	0.0081	0.0055	0.008	0.0019	0.0145		1.7286	1.0197	1.0286	0.6092		100	100	100	100		Amino Acid	Glutathione Metabolism	100001311	495-27-2	1462	290.135
	393	Peptide	Gamma-glutamyl Amino Acid	gamma-glutamylalanine	LC/MS pos	37063		HMDB29142	440103					0.6	0.84	0.65	0.91		4.8313e-05	9.234e-05	0.0012	0.0029	0.0312	0.0439	2.8044e-05	0.0001	0.0846	0.0709	0.0003	0.0007	0.3472	0.3715		1.5581	1.0141	0.9372	0.8567		100	100	100	100		Peptide	Gamma-glutamyl Amino Acid	100001843	5875-41-2	1116	219.098
	395			gamma-glutamylglutamate	LC/MS pos	36738	C05282	HMDB11737	92865					0.26	0.4	0.48	0.73		4.5717e-11	1.6252e-09	4.2845e-05	0.0002	0.0426	0.0511	1.4462e-09	4.2781e-08	3.0565e-06	3.1581e-05	3.4035e-05	0.0001	0.065	0.1319		2.7045	1.2973	0.7026	0.5151		100	100	100	100		Peptide	Gamma-glutamyl Amino Acid	331	1116-22-9	1045	277.103
	396			gamma-glutamylglutamine	LC/MS pos	2730	C05283	HMDB11738	150914					0.62	1.16	0.4	0.76		0.0339	0.0197	1.5135e-09	2.4067e-08	9.9329e-05	0.0009	5.0213e-05	0.0002	0.1148	0.0927	3.5064e-10	5.3337e-09	0.0054	0.0283		1.8609	0.7527	1.1576	0.8762		100	100	100	100		Peptide	Gamma-glutamyl Amino Acid	1140	10148-81-9	817.9	276.119
	399			gamma-glutamylisoleucine*	LC/MS pos	34456		HMDB11170	14253342					0.52	0.57	0.7	0.76		4.4159e-09	5.6067e-08	0.0001	0.0004	0.5805	0.2708	8.2398e-07	1.0833e-05	6.9458e-06	5.5364e-05	0.0013	0.0025	0.0098	0.0437		1.743	1.2202	0.907	0.6928		100	100	100	100		Peptide	Gamma-glutamyl Amino Acid	100001485		2661	261.144
	400			gamma-glutamylleucine	LC/MS pos	18369		HMDB11171	151023					0.5	0.63	0.61	0.77		7.4317e-07	3.3025e-06	0.0002	0.0006	0.2752	0.1727	1.3343e-05	8.1809e-05	0.0009	0.0023	0.0006	0.0013	0.0302	0.0861		1.9471	1.1903	0.9713	0.7462		100	100	100	100		Peptide	Gamma-glutamyl Amino Acid	1268	2566-39-4	2757.2	261.144
	401			gamma-glutamyl-epsilon-lysine	LC/MS pos	33934		HMDB03869	65254;14284565					0.51	0.58	0.7	0.8		4.8178e-05	9.234e-05	0.0196	0.0265	0.6107	0.2787	0.0008	0.0019	0.0052	0.0083	0.0435	0.0414	0.1767	0.2352		1.7184	1.2001	0.88	0.7001		100	100	100	100		Peptide	Gamma-glutamyl Amino Acid	100001262	17105-15-6	760	276.155
	402			gamma-glutamylmethionine	LC/MS pos	44872		HMDB29155	7009567					0.46	0.93	0.54	1.09		0.0026	0.0024	0.0534	0.0594	0.0093	0.0184	0.0002	0.0006	0.7209	0.4063	0.002	0.0034	0.5874	0.4971		1.7262	0.9251	0.7896	0.8589		100	100	100	100		Peptide	Gamma-glutamyl Amino Acid	100001313	17663-87-5	2016.5	279.101
	403			gamma-glutamylphenylalanine	LC/MS pos	33422		HMDB00594	111299					0.7	0.73	0.77	0.8		0.0002	0.0003	0.0022	0.0048	0.8204	0.3326	0.0032	0.0055	0.0072	0.0104	0.0168	0.0196	0.0347	0.0928		1.4262	1.0956	0.9944	0.7979		100	100	100	100		Peptide	Gamma-glutamyl Amino Acid	100000491	7432-24-8	2865	295.129
	404			gamma-glutamylthreonine*	LC/MS pos	33364		HMDB29159						0.65	0.82	0.66	0.84		4.501e-05	8.7918e-05	5.5954e-05	0.0002	0.0777	0.078	6.203e-05	0.0003	0.0435	0.0434	7.234e-05	0.0002	0.0489	0.1125		1.4933	0.9839	0.9654	0.811		100	100	100	100		Peptide	Gamma-glutamyl Amino Acid	100001314	5652-48-2	996.6	249.108
	405			gamma-glutamyltryptophan	LC/MS pos	33947		HMDB29160	3989307					0.6	0.65	0.79	0.85		1.071e-07	6.5648e-07	0.0054	0.01	0.6219	0.2826	1.0506e-05	6.9064e-05	7.2158e-05	0.0003	0.0191	0.0213	0.0856	0.1565		1.5457	1.2162	0.9266	0.7903		100	100	100	100		Peptide	Gamma-glutamyl Amino Acid	100001295	66471-20-3	3035	334.14
	406			gamma-glutamyltyrosine	LC/MS pos	2734		HMDB11741	94340					0.54	0.63	0.67	0.78		2.2594e-05	4.7811e-05	0.0027	0.0057	0.5157	0.2494	0.0004	0.001	0.0041	0.0069	0.0093	0.0123	0.0728	0.1416		1.766	1.1793	0.9542	0.7474		100	100	100	100		Peptide	Gamma-glutamyl Amino Acid	1102	7432-23-7	2080.4	311.124
	407			gamma-glutamylvaline	LC/MS pos	43829		HMDB11172	7015683					0.53	0.59	0.64	0.72		1.1973e-08	1.1201e-07	5.0145e-06	2.9669e-05	0.4608	0.2359	1.2446e-06	1.4026e-05	2.1921e-05	0.0001	0.0001	0.0003	0.0018	0.0145		1.8264	1.1715	0.9723	0.6959		100	100	100	100		Peptide	Gamma-glutamyl Amino Acid	100001126	2746-34-1	2045	247.129
	409		Dipeptide Derivative	carnosine	LC/MS neg	1768	C00386	HMDB00033	439224					1.01	0.95	0.83	0.78		0.919	0.2997	0.0794	0.0798	0.8625	0.3447	0.8459	0.3804	0.9596	0.4885	0.2543	0.1617	0.1693	0.2296		1.1208	0.9325	1.1326	0.8887		100	100	100	100		Peptide	Dipeptide Derivative	249	305-84-0	804	225.099
	410			N-acetylcarnosine	LC/MS pos	43488		HMDB12881	9903482					1.51	0.89	1.23	0.73		0.1899	0.0798	0.4337	0.2728	0.1183	0.1022	0.0459	0.0438	0.8511	0.454	0.5681	0.2842	0.1	0.1694		0.7191	0.8844	1.0859	0.7888		88	88	100	88		Peptide	Dipeptide Derivative	100004046	56353-15-2	1166	269.124
	412			anserine	LC/MS neg	15747	C01262	HMDB00194	112072					0.85	0.84	0.89	0.87		0.4357	0.163	0.3932	0.2539	0.6969	0.2994	0.7809	0.3667	0.4094	0.259	0.7402	0.3358	0.3803	0.3894		1.1129	0.9879	0.9485	0.8296		100	100	100	100		Peptide	Dipeptide Derivative	100000044	10030-52-1	1124.8	239.115
	534		Dipeptide	glycylisoleucine	LC/MS pos	36659		HMDB28844	88079					0.9	0.76	2.84	2.42		0.6496	0.227	0.0003	0.0009	0.8929	0.3508	0.6771	0.3304	0.8208	0.4429	0.0086	0.0116	0.0054	0.0283		0.6392	1.8158	0.5733	1.387		63	88	50	100		Peptide	Dipeptide	100001790	19461-38-2	2080	189.123
	535			glycylleucine	LC/MS pos	34398	C02155	HMDB00759	92843					1.16	0.59	2	1.01		0.2563	0.1039	0.0098	0.0156	0.0107	0.0201	0.2743	0.1722	0.0102	0.0141	0.0006	0.0012	0.9792	0.6373		0.7561	1.5129	0.8784	0.8878		88	100	100	100		Peptide	Dipeptide	100001258	869-19-2	2190.9	189.123
	545			glycylvaline	LC/MS pos	18357		HMDB28854	97417					1.16	0.57	2.37	1.16		0.1094	0.0512	0.0333	0.0402	0.0204	0.0326	0.5741	0.2927	0.0071	0.0104	0.0025	0.0041	0.8779	0.6057		0.6995	1.6568	0.809	0.9386		88	100	75	63		Peptide	Dipeptide	100000487	1963-21-9	1561.6	175.108
	569			isoleucylglycine	LC/MS pos	40008			342532					1.01	0.85	1.2	1.01		0.4838	0.1777	0.3592	0.2373	0.286	0.1753	0.7911	0.3686	0.2142	0.1521	0.1643	0.1197	0.9131	0.6184		0.9414	1.1302	0.9521	0.9649		100	100	100	100		Peptide	Dipeptide	100003169	868-28-0	1740	189.123
	656			prolylglycine	LC/MS pos	40703			7408076;6426709					0.95	0.59	1.67	1.04		0.1523	0.0667	0.1108	0.101	0.1463	0.1191	0.9874	0.4199	0.0451	0.0445	0.0346	0.0348	0.9149	0.6184		1.006	1.6811	0.9583	0.9995		100	100	100	100		Peptide	Dipeptide	100003674	2578-57-6	875	173.092
	793	Carbohydrate	Glycolysis, Gluconeogenesis, and Pyruvate Metabolism	1,5-anhydroglucitol (1,5-AG)	LC/MS neg	20675	C07326	HMDB02712	64960					1.07	0.84	1.34	1.05		0.137	0.0611	2.2618e-05	0.0001	0.0012	0.0053	0.1533	0.1099	0.0011	0.0026	1.2616e-06	7.7799e-06	0.3082	0.3424		0.9185	1.2328	0.9869	1.0392		100	100	100	100		Carbohydrate	Glycolysis, Gluconeogenesis, and Pyruvate Metabolism	100000580	154-58-5	802	163.061
	796			glucose	LC/MS polar	48152	C00031	HMDB00122	79025					1.12	1.25	0.82	0.91		0.0002	0.0003	0.0012	0.003	0.1746	0.1319	0.0539	0.0485	0.0004	0.0013	0.0015	0.0027	0.1306	0.199		0.9748	0.796	1.0907	0.993		100	100	100	100		Carbohydrate	Glycolysis, Gluconeogenesis, and Pyruvate Metabolism	572	50-99-7	2342	225.062
	811			phosphoenolpyruvate (PEP)	LC/MS neg	597	C00074	HMDB00263	1005					1.09	0.65	1.67	0.99		0.1125	0.0522	0.6165	0.3401	0.1967	0.1414	0.8247	0.3772	0.0455	0.0446	0.2065	0.1398	0.5685	0.4866		0.7198	1.1989	0.7852	0.7788		100	100	63	38		Carbohydrate	Glycolysis, Gluconeogenesis, and Pyruvate Metabolism	463	10526-80-4	587.3	166.975
	812			pyruvate	LC/MS neg	42582	C00022	HMDB00243	1060					0.97	1.03	0.82	0.87		0.9436	0.3055	0.0094	0.0154	0.5004	0.2453	0.5981	0.3018	0.6689	0.384	0.0206	0.0228	0.1478	0.2133		1.0853	0.887	1.0518	0.9153		100	100	100	100		Carbohydrate	Glycolysis, Gluconeogenesis, and Pyruvate Metabolism	823	127-17-3	732.4	87.0088
	813			lactate	LC/MS polar	527	C00186	HMDB00190	612					1.05	0.93	1	0.88		0.8147	0.2717	0.2254	0.1662	0.3614	0.2005	0.6288	0.3134	0.4173	0.2628	0.8271	0.3622	0.1366	0.2029		1.0041	0.9993	1.0544	0.9293		100	100	100	100		Carbohydrate	Glycolysis, Gluconeogenesis, and Pyruvate Metabolism	482	79-33-4	1468.8	89.0244
	816			glycerate	LC/MS polar	1572	C00258	HMDB00139	752					1.24	1.09	1.02	0.89		0.0099	0.0069	0.3323	0.2233	0.2193	0.1516	0.0082	0.0116	0.2942	0.1973	0.8499	0.368	0.1239	0.1929		0.9427	0.9593	1.1649	1.0415		100	100	100	100		Carbohydrate	Glycolysis, Gluconeogenesis, and Pyruvate Metabolism	1052	600-19-1	2070.4	105.019
	826		Pentose Phosphate Pathway	ribulose/xylulose 5-phosphate	GC/MS	37288	C00199							1.03	2.21	1.47	3.15		0.65	0.227	0.1114	0.1012	0.7025	0.3004	0.9593	0.4105	0.5552	0.3309	0.3813	0.2168	0.1623	0.2246		0.436	0.643	0.4507	1.4215		25	38	13	25		Carbohydrate	Pentose Phosphate Pathway	100002179		1935	357.2
	829		Pentose Metabolism	ribulose	GC/MS	35855	C00309	HMDB00621	151261					0.82	0.74	1.09	0.99		0.1273	0.0573	0.9531	0.4416	0.8475	0.3397	0.3384	0.2012	0.2222	0.1561	0.859	0.3691	0.9247	0.6203		0.9123	0.9973	0.7446	0.7363		75	75	63	50		Carbohydrate	Pentose Metabolism	100000147	488-84-6	1662	306.1
	831			ribose	LC/MS polar	1471	C00121	HMDB00283	5779					0.87	0.38	1.35	0.59		0.0009	0.001	0.5444	0.3135	0.0807	0.0795	0.193	0.1305	0.0006	0.0016	0.4038	0.2248	0.0973	0.1682		1.2085	1.6348	1.0524	0.6191		100	100	100	100		Carbohydrate	Pentose Metabolism	914	50-69-1	1508.2	195.051
	832			ribitol	LC/MS polar	15772	C00474	HMDB00508	6912					1.03	0.61	1.32	0.79		0.0042	0.0034	0.6306	0.345	0.002	0.0068	0.8359	0.3782	8.0382e-05	0.0003	0.0102	0.0132	0.0482	0.1118		0.9454	1.2516	0.9736	0.7683		100	100	100	100		Carbohydrate	Pentose Metabolism	100000406	488-81-3	1789.6	151.061
	833			ribonate	LC/MS polar	27731	C01685	HMDB00867	5460677					1.05	0.95	1.09	0.98		0.8623	0.2849	0.5844	0.3304	0.3969	0.2138	0.4702	0.2527	0.6317	0.3672	0.326	0.1952	0.8298	0.5966		0.949	1.0344	1.0005	0.9849		100	100	100	100		Carbohydrate	Pentose Metabolism	100001007	5336-08-03	2425	165.04
	836			xylonate	GC/MS	35638	C05411	HMDB60256	6602431					0.42	0.49	1.63	1.9		0.003	0.0026	0.0988	0.0931	0.495	0.2432	0.0095	0.013	0.0814	0.0688	0.4784	0.2527	0.1009	0.1695		1.1785	1.922	0.4958	0.9408		100	100	50	75		Carbohydrate	Pentose Metabolism	100001627	73686-31-7	1722	292
	837			xylose	GC/MS	15835	C00181	HMDB00098	135191					0.45	0.65	0.5	0.73		0.0041	0.0033	0.0227	0.0299	0.7043	0.3006	0.0192	0.0226	0.0622	0.0562	0.058	0.0517	0.1626	0.2246		1.9427	0.9685	0.8699	0.6326		100	100	100	75		Carbohydrate	Pentose Metabolism	826	609-06-3	1723.9	204
	838			xylitol	GC/MS	4966	C00379	HMDB02917	6912					0.8	1.42	0.73	1.3		0.5896	0.21	0.8582	0.4159	0.2986	0.1813	0.7193	0.3462	0.2661	0.1806	0.3883	0.2177	0.5394	0.4711		0.8812	0.6447	0.707	0.9184		63	50	63	75		Carbohydrate	Pentose Metabolism	543	87-99-0	1677.6	307.2
	839			arabinose	GC/MS	575	C00216	HMDB00646	66308					1.03	1.06	0.78	0.8		0.9049	0.2973	0.2631	0.187	0.9931	0.3745	0.9278	0.4014	0.9376	0.4831	0.4297	0.2329	0.4227	0.4145		0.862	0.6711	0.8893	0.7096		63	50	63	50		Carbohydrate	Pentose Metabolism	828	28697-53-2	1631.6	217
	844			arabitol	GC/MS	38075	C01904	HMDB00568	94154					0.53	0.66	1.2	1.51		0.0012	0.0012	0.0271	0.0344	0.5721	0.2685	0.0062	0.0095	0.04	0.0403	0.2234	0.1476	0.0494	0.1125		1.2146	1.4565	0.6398	0.9664		100	100	88	100		Carbohydrate	Pentose Metabolism	100000012	7643-75-6	1687.5	307.1
	867		Disaccharides and Oligosaccharides	stachyose	LC/MS neg	15960	C01613	HMDB03553	439531					0.55	0.05	9.51	0.85		0.0002	0.0003	0.0196	0.0265	0.0095	0.0184	0.2866	0.1776	2.6021e-05	0.0001	0.0009	0.0018	0.8288	0.5966		0.9699	9.2235	0.5357	0.4546		75	100	75	88		Carbohydrate	Disaccharides and Oligosaccharides	934	10094-58-3	920	665.215
	886			sucrose	LC/MS polar	1519	C00089	HMDB00258	5988					0.95	0.57	1.26	0.75		0.5358	0.192	0.8642	0.4174	0.1575	0.1255	0.5641	0.2884	0.1527	0.1167	0.2603	0.1636	0.3733	0.3871		1.0844	1.3641	1.0261	0.7719		50	100	88	88		Carbohydrate	Disaccharides and Oligosaccharides	935	57-50-1	3092	387.114
	895			raffinose	LC/MS neg	586	C00492	HMDB03213	10542					0.65	0.1	6.98	1.1		0.0004	0.0005	0.0048	0.0093	0.0109	0.0201	0.3597	0.2123	4.9267e-05	0.0002	0.0003	0.0008	0.8133	0.5894		1.1753	8.2047	0.7608	0.8336		100	100	100	100		Carbohydrate	Disaccharides and Oligosaccharides	879	17629-30-0	978.3	503.162
	897			verbascose	LC/MS neg	37132	C08252		441434					1	1	1	1								1	0.4211	1	0.4964	1	0.406	1	0.6396		1	1	1	1		0	13	0	0		Carbohydrate	Disaccharides and Oligosaccharides	100001864	546-62-3	935	827.267
	900		Fructose, Mannose and Galactose Metabolism	fructose	LC/MS polar	48195	C00095	HMDB00660	5984					1.21	0.95	1.04	0.82		0.165	0.0712	0.1311	0.1127	0.0144	0.0252	0.008	0.0116	0.4093	0.259	0.4618	0.2462	0.0064	0.0316		0.9286	0.9655	1.1225	0.9161		100	100	100	100		Carbohydrate	Fructose, Mannose and Galactose Metabolism	878	57-48-7	2022.2	225.062
	903			sorbitol	GC/MS	15053	C00794	HMDB00247	5780					0.77	0.59	0.91	0.7		0.0002	0.0003	0.0466	0.0529	0.3551	0.1982	0.0245	0.0265	0.0009	0.0023	0.4261	0.2315	0.0414	0.101		1.2448	1.1299	0.9531	0.6691		100	100	88	100		Carbohydrate	Fructose, Mannose and Galactose Metabolism	506	6706-59-8	1843	319.1
	906			mannose	LC/MS polar	48153	C00159	HMDB00169	18950					1.45	1.62	0.74	0.83		4.5819e-06	1.2726e-05	0.0022	0.0048	0.3919	0.2124	0.0021	0.0038	7.8901e-05	0.0003	0.0057	0.0081	0.0882	0.1569		0.9192	0.6806	1.3311	1.1035		100	100	100	100		Carbohydrate	Fructose, Mannose and Galactose Metabolism	803	3458-28-4	2200	225.062
	924			galactonate	LC/MS polar	27719	C00880	HMDB00565	128869					0.61	0.56	1.08	0.99		6.2048e-05	0.0001	0.9614	0.4423	0.8472	0.3397	0.0035	0.006	0.0017	0.0037	0.9187	0.3846	0.8646	0.6035		1.45	1.5605	0.8905	0.8799		100	100	100	100		Carbohydrate	Fructose, Mannose and Galactose Metabolism	100001026	299-28-5	3085	195.051
	949		Aminosugar Metabolism	glucuronate	LC/MS polar	15443	C00191	HMDB00127	444791					0.89	0.96	0.79	0.85		0.3311	0.129	0.0051	0.0096	0.5959	0.2749	0.2899	0.1787	0.7513	0.4159	0.0174	0.0202	0.0879	0.1569		1.2298	0.9659	1.0899	0.9257		100	100	100	100		Carbohydrate	Aminosugar Metabolism	100000257	207300-70-7	3233.3	193.035
	960			N-acetylneuraminate	LC/MS polar	32377	C00270	HMDB00230	439197					1.01	0.88	1.18	1.03		0.312	0.1229	0.1172	0.1042	0.2286	0.1545	0.8879	0.3911	0.1212	0.0963	0.0538	0.0485	0.787	0.5727		0.9554	1.1284	0.9643	0.9947		100	100	100	100		Carbohydrate	Aminosugar Metabolism	1162	131-48-6	3072.6	308.099
	972			erythronate*	LC/MS polar	42420		HMDB00613	2781043					0.82	0.73	1.07	0.95		0.0002	0.0003	0.8946	0.4278	0.274	0.1724	0.0361	0.0365	0.0008	0.002	0.3845	0.2168	0.4932	0.4454		1.1365	1.2174	0.9321	0.887		100	100	100	100		Carbohydrate	Aminosugar Metabolism	100001320	88759-55-1	2186	135.03
	979	Energy	TCA Cycle	citrate	LC/MS neg	1564	C00158	HMDB00094	311					0.82	0.86	1.09	1.15		0.001	0.0011	0.0169	0.0235	0.6384	0.2866	0.0067	0.01	0.0322	0.034	0.1553	0.115	0.0419	0.101		1.0733	1.1752	0.885	1.0147		100	100	100	100		Energy	TCA Cycle	1124	77-92-9	582	191.02
	981			aconitate [cis or trans]	LC/MS neg	46173	C00417	HMDB00072						0.82	0.82	1.02	1.03		5.1269e-05	9.5928e-05	0.5629	0.3204	0.9585	0.3668	0.002	0.0037	0.0024	0.0049	0.7091	0.3249	0.6554	0.5305		1.0843	1.1079	0.8846	0.9087		100	100	100	100		Energy	TCA Cycle	100001359		580	173.009
	984			alpha-ketoglutarate	LC/MS polar	528	C00026	HMDB00208	51					0.93	0.6	1.69	1.08		0.1644	0.0711	0.0836	0.0828	0.2659	0.1689	0.8377	0.3783	0.0807	0.0686	0.0477	0.0447	0.6449	0.5298		1.0947	1.8518	1.0208	1.1032		100	100	100	100		Energy	TCA Cycle	93	305-72-6;328-50-7;22202-68-2	2700	145.014
	986			succinylcarnitine	LC/MS pos	37058								0.85	0.78	1.05	0.97		0.062	0.0317	0.9901	0.4507	0.5045	0.2468	0.3777	0.2196	0.0745	0.0649	0.6301	0.304	0.6425	0.5297		1.1079	1.1655	0.9386	0.9058		100	100	100	100		Energy	TCA Cycle	100001948		1419	262.129
	987			succinate	LC/MS neg	1437	C00042	HMDB00254	1110					1.76	0.66	1.6	0.6		0.6372	0.2247	0.8919	0.4273	0.0333	0.0459	0.2231	0.1471	0.0651	0.0584	0.1484	0.1107	0.1041	0.1732		1.0929	1.7486	1.9284	1.1525		100	100	100	100		Energy	TCA Cycle	252	110-15-6	603	117.019
	988			fumarate	LC/MS polar	1643	C00122	HMDB00134	444972					0.76	0.53	1.24	0.86		0.0004	0.0005	0.7366	0.3748	0.1336	0.1123	0.0869	0.0697	0.0005	0.0014	0.1934	0.1332	0.4014	0.4025		1.199	1.4879	0.9121	0.782		100	100	100	100		Energy	TCA Cycle	330	100-17-8	3084	115.004
	989			malate	LC/MS polar	1303	C00149	HMDB00156	525					0.82	0.59	1.28	0.92		0.0079	0.0057	0.4892	0.2915	0.213	0.1484	0.2709	0.171	0.0068	0.01	0.1735	0.1229	0.6882	0.5378		1.1426	1.4639	0.9382	0.8623		100	100	100	100		Energy	TCA Cycle	409	6915-15-7	3343.1	133.014
	1002		Oxidative Phosphorylation	phosphate	LC/MS neg	42109	C00009	HMDB01429	1061					1.01	1.01	0.98	0.98		0.9258	0.3003	0.5048	0.2963	0.9683	0.3692	0.9252	0.4014	0.9699	0.492	0.6566	0.3089	0.6168	0.512		1.0087	0.9865	1.019	0.994		100	100	100	100		Energy	Oxidative Phosphorylation	461	7664-38-2	608	96.9696
	1003	Lipid	Short Chain Fatty Acid	valerate	LC/MS neg	33443	C00803	HMDB00892	7991					1.32	0.78	1.74	1.02		0.8556	0.2832	0.1158	0.1037	0.2608	0.1671	0.3545	0.2097	0.501	0.3019	0.0601	0.0529	0.7392	0.5548		0.5915	1.0311	0.7821	0.8004		63	75	75	88		Lipid	Short Chain Fatty Acid	1136	109-52-4	1718	101.061
	1004		Medium Chain Fatty Acid	caproate (6:0)	LC/MS neg	32489	C01585	HMDB00535	8892					1.22	1.11	1.36	1.24		0.0008	0.0009	7.9022e-07	6.2827e-06	0.2668	0.1689	0.0017	0.0032	0.0716	0.063	1.3423e-05	5.3731e-05	0.001	0.0113		0.7932	1.0808	0.9707	1.2016		100	100	100	100		Lipid	Medium Chain Fatty Acid	926	142-62-1	2713.7	115.076
	1005			heptanoate (7:0)	LC/MS neg	1644	C17714	HMDB00666	8094					1.16	0.75	1.52	0.98		0.1202	0.0554	0.0003	0.0009	9.1081e-05	0.0009	0.0454	0.0435	0.0002	0.0006	1.2193e-06	7.7279e-06	0.7632	0.5618		0.8863	1.3442	1.0277	1.0035		100	100	100	100		Lipid	Medium Chain Fatty Acid	925	111-14-8	3670	129.092
	1006			caprylate (8:0)	LC/MS neg	32492	C06423	HMDB00482	379					1.24	0.88	1.24	0.88		0.5326	0.1916	0.4421	0.2771	0.0068	0.0149	0.018	0.0216	0.1164	0.0936	0.0141	0.0168	0.1408	0.2075		0.9017	1.1164	1.1154	0.9804		100	100	100	100		Lipid	Medium Chain Fatty Acid	932	124-07-2	4362	143.108
	1007			pelargonate (9:0)	LC/MS neg	12035	C01601	HMDB00847	8158					1.21	0.79	1.18	0.77		0.6391	0.2249	0.9099	0.4307	0.1434	0.118	0.472	0.2527	0.1726	0.1284	0.3337	0.1983	0.2618	0.3049		1.0292	1.2127	1.2404	0.9568		100	100	100	100		Lipid	Medium Chain Fatty Acid	437	112-05-0	4798	157.123
	1008			caprate (10:0)	LC/MS neg	1642	C01571	HMDB00511	2969					1.24	0.83	1.19	0.8		0.8804	0.2903	0.7665	0.3839	0.0064	0.0143	0.037	0.0373	0.0582	0.0536	0.0719	0.0617	0.0295	0.0861		0.9645	1.143	1.1992	0.9538		100	100	100	100		Lipid	Medium Chain Fatty Acid	888	112-37-8	5090.7	171.139
	1009			undecanoate (11:0)	LC/MS neg	12067	C17715	HMDB00947	8180					1.17	0.74	1.46	0.92		0.2191	0.0908	0.0293	0.0369	0.0034	0.0092	0.1794	0.1235	0.0038	0.0066	0.0006	0.0012	0.5262	0.463		0.8689	1.2693	1.0181	0.9381		100	100	100	100		Lipid	Medium Chain Fatty Acid	889	334-48-5	5219.2	185.155
	1010			10-undecenoate (11:1n1)	LC/MS neg	32497								1.53	0.48	4.1	1.29		0.1543	0.0674	1.2432e-09	2.1085e-08	8.3044e-07	2.5012e-05	0.002	0.0037	7.3483e-06	5.6945e-05	1.9909e-11	4.5426e-10	0.0785	0.1477		0.5584	2.2886	0.8537	1.101		100	100	100	100		Lipid	Medium Chain Fatty Acid	100001197	1333-28-4	5085.8	183.139
	1011			laurate (12:0)	LC/MS neg	1645	C02679	HMDB00638	3893					1.32	0.77	1.43	0.83		0.9485	0.3055	0.2064	0.1587	0.0008	0.004	0.0116	0.0154	0.0144	0.0181	0.0013	0.0025	0.0929	0.1644		0.8522	1.2162	1.1215	0.9358		100	100	100	100		Lipid	Medium Chain Fatty Acid	181	143-07-7	5300	199.17
	1014		Long Chain Fatty Acid	myristate (14:0)	LC/MS neg	1365	C06424	HMDB00806	11005					1.06	0.59	1.3	0.73		0.0734	0.0364	0.7693	0.3845	0.0185	0.0309	0.6545	0.3227	0.0046	0.0075	0.1303	0.1012	0.0579	0.1232		1.11	1.448	1.1765	0.8604		100	100	100	100		Lipid	Long Chain Fatty Acid	519	544-63-8	5440	227.202
	1015			myristoleate (14:1n5)	LC/MS neg	32418	C08322	HMDB02000	5281119					1.74	0.64	1.72	0.63		0.6928	0.2405	0.9108	0.4307	0.0024	0.0075	0.0132	0.0168	0.0465	0.0454	0.021	0.0232	0.0301	0.0861		0.8452	1.4514	1.4734	0.9338		100	100	100	100		Lipid	Long Chain Fatty Acid	100001198	544-64-9	5346.9	225.186
	1016			pentadecanoate (15:0)	LC/MS neg	1361	C16537	HMDB00826	13849					0.92	0.63	1.12	0.77		0.0049	0.0038	0.3207	0.2181	0.0441	0.0519	0.5083	0.2679	0.0011	0.0025	0.4444	0.238	0.0358	0.0939		1.0514	1.1734	0.9627	0.7432		100	100	100	100		Lipid	Long Chain Fatty Acid	980	1002-84-2;10002-84-2	5521	241.217
	1017			palmitate (16:0)	LC/MS neg	1336	C00249	HMDB00220	985					0.87	0.61	1.11	0.77		0.0045	0.0035	0.3525	0.2354	0.0956	0.088	0.3417	0.2027	0.002	0.0042	0.5859	0.29	0.0694	0.1378		1.1791	1.3124	1.029	0.7967		100	100	100	100		Lipid	Long Chain Fatty Acid	424	57-10-3	5618	255.233
	1018			palmitoleate (16:1n7)	LC/MS neg	33447	C08362	HMDB03229	445638					1.23	0.62	1.15	0.58		0.3993	0.152	0.1287	0.112	0.0667	0.0697	0.4633	0.2515	0.0607	0.0552	0.8106	0.3568	0.0205	0.0708		1.1474	1.3195	1.41	0.819		100	100	100	100		Lipid	Long Chain Fatty Acid	452	373-49-9	5475	253.217
	1020			margarate (17:0)	LC/MS neg	1121		HMDB02259	10465					0.95	0.46	1.67	0.81		0.0063	0.0047	0.3508	0.2348	0.0195	0.0319	0.7385	0.3531	0.0006	0.0017	0.0221	0.024	0.2888	0.3275		1.1568	1.9287	1.1009	0.8899		100	100	100	100		Lipid	Long Chain Fatty Acid	891	506-12-7	5731	269.249
	1021			10-heptadecenoate (17:1n7)	LC/MS neg	33971		HMDB60038	5312435					1.03	0.54	1.28	0.67		0.0513	0.027	0.3569	0.2369	0.0355	0.0468	0.9037	0.3948	0.0056	0.0086	0.3761	0.2161	0.0344	0.0928		1.1531	1.4763	1.1856	0.7958		100	100	100	100		Lipid	Long Chain Fatty Acid	100001278	29743-97-3	5555	267.233
	1022			stearate (18:0)	LC/MS neg	1358	C01530	HMDB00827	5281					0.83	0.56	1.35	0.91		0.0007	0.0008	0.3638	0.2385	0.085	0.0824	0.164	0.1148	0.0005	0.0014	0.0657	0.0572	0.5469	0.4738		1.1303	1.5208	0.9376	0.8495		100	100	100	100		Lipid	Long Chain Fatty Acid	439	57-11-4	5872	283.264
	1024			oleate (18:1n9)	GC/MS	1359	C00712	HMDB00207	445639					0.89	0.64	1.18	0.85		0.0081	0.0058	0.7055	0.3692	0.0974	0.0889	0.4279	0.24	0.0032	0.0058	0.3538	0.208	0.1493	0.2138		1.0853	1.276	0.9641	0.8201		100	100	100	100		Lipid	Long Chain Fatty Acid	442	112-80-1	1984.4	339.2
	1026			cis-vaccenate (18:1n7)	GC/MS	33970	C08367	HMDB03231	5282761					0.84	0.74	1.1	0.97		0.1326	0.0592	0.9536	0.4416	0.638	0.2866	0.4542	0.2482	0.1633	0.1229	0.7084	0.3249	0.7703	0.5618		1.1102	1.2202	0.9367	0.9073		100	100	100	100		Lipid	Long Chain Fatty Acid	100001228	506-17-2	1987	339.3
	1030			nonadecanoate (19:0)	LC/MS neg	1356	C16535	HMDB00772	12591					0.57	0.46	1.1	0.88		5.1012e-05	9.5928e-05	0.9104	0.4307	0.475	0.2393	0.0078	0.0114	0.0006	0.0016	0.5583	0.2812	0.6692	0.5346		1.3329	1.4704	0.7608	0.6733		100	100	100	100		Lipid	Long Chain Fatty Acid	892	646-30-0	6068	297.28
	1031			10-nonadecenoate (19:1n9)	LC/MS neg	33972		HMDB13622	5312513					1.07	0.49	1.55	0.71		0.0671	0.034	0.8834	0.424	0.0297	0.0424	0.7867	0.3677	0.0061	0.0091	0.1408	0.1069	0.0956	0.166		1.1669	1.8051	1.2515	0.8856		100	100	100	100		Lipid	Long Chain Fatty Acid	100001277	73033-09-7	5780	295.264
	1033			arachidate (20:0)	LC/MS neg	1118	C06425	HMDB02212	10467					0.34	0.36	0.77	0.83		9.1595e-09	9.4578e-08	0.1061	0.0985	0.8308	0.335	2.787e-06	2.6089e-05	6.3709e-06	5.3859e-05	0.1931	0.1332	0.3126	0.3436		1.9827	1.525	0.6675	0.5523		100	100	100	100		Lipid	Long Chain Fatty Acid	893	506-30-9	6295	311.296
	1036			eicosenoate (20:1)	LC/MS neg	33587		HMDB02231	5282768					0.65	0.41	1.05	0.67		0.0005	0.0006	0.2076	0.1591	0.1609	0.1267	0.088	0.0701	0.0007	0.0019	0.9161	0.3846	0.0637	0.1309		1.428	1.5031	0.9276	0.6235		100	100	100	100		Lipid	Long Chain Fatty Acid	100001335		5950	309.28
	1040			erucate (22:1n9)	LC/MS neg	1552	C08316	HMDB02068	5281116					0.35	0.31	0.81	0.72		1.7619e-07	9.211e-07	0.1102	0.101	0.6428	0.2866	9.8626e-05	0.0004	1.6114e-05	9.9899e-05	0.4109	0.2276	0.1453	0.2107		1.9703	1.5915	0.6935	0.4993		100	100	100	100		Lipid	Long Chain Fatty Acid	1087	112-86-7	6355.6	337.311
	1049		Polyunsaturated Fatty Acid (n3 and n6)	stearidonate (18:4n3)	LC/MS neg	33969	C16300	HMDB06547	5312508					0.71	0.33	1.49	0.68		2.1443e-06	7.3297e-06	0.976	0.4474	0.0023	0.0075	0.0776	0.0631	4.0072e-07	7.4527e-06	0.0238	0.0255	0.0262	0.0798		1.2133	1.8081	0.8624	0.588		100	100	100	100		Lipid	Polyunsaturated Fatty Acid (n3 and n6)	100001229	111174-40-4	5395	275.202
	1050			eicosapentaenoate (EPA; 20:5n3)	LC/MS neg	18467	C06428	HMDB01999	446284					1.27	0.64	1.85	0.93		0.2814	0.1122	0.0184	0.0253	0.0016	0.0059	0.101	0.0797	0.003	0.0056	0.0002	0.0006	0.4885	0.4431		0.8353	1.5462	1.0587	0.985		100	100	100	100		Lipid	Polyunsaturated Fatty Acid (n3 and n6)	2050	10-2005-9;10417-94-4	5450	301.217
	1051			docosapentaenoate (n3 DPA; 22:5n3)	LC/MS neg	32504	C16513	HMDB01976	6441454					1.07	0.5	1.44	0.68		0.0397	0.0227	0.74	0.3758	0.0082	0.0168	0.6291	0.3134	0.0014	0.0032	0.0865	0.0725	0.0324	0.0897		1.0552	1.5166	1.1318	0.764		100	100	100	100		Lipid	Polyunsaturated Fatty Acid (n3 and n6)	100001181	2234-74-4	5571	329.249
	1052			docosahexaenoate (DHA; 22:6n3)	LC/MS neg	44675	C06429	HMDB02183	445580					1.16	0.58	1.67	0.83		0.1025	0.0484	0.1485	0.1255	0.0021	0.007	0.2394	0.1548	0.0012	0.0029	0.0018	0.0032	0.1893	0.2457		0.9143	1.5285	1.0637	0.8811		100	100	100	100		Lipid	Polyunsaturated Fatty Acid (n3 and n6)	100000665	6217-54-5	5525	327.233
	1056			linoleate (18:2n6)	LC/MS neg	1105	C01595	HMDB00673	5280450					1.25	0.58	1.46	0.67		0.1784	0.0757	0.7635	0.3831	0.0023	0.0075	0.1745	0.1207	0.0024	0.0048	0.04	0.0395	0.0153	0.061		0.9805	1.4293	1.2283	0.8248		100	100	100	100		Lipid	Polyunsaturated Fatty Acid (n3 and n6)	180	60-33-3	5535	279.233
	1058			linolenate [alpha or gamma; (18:3n3 or 6)]	LC/MS neg	34035	C06426	HMDB03073	5280934					1.07	0.41	1.54	0.59		0.0093	0.0067	0.6327	0.3451	0.0015	0.0057	0.614	0.3086	0.0001	0.0005	0.041	0.0398	0.0086	0.0391		1.0167	1.5656	1.0847	0.6378		100	100	100	100		Lipid	Polyunsaturated Fatty Acid (n3 and n6)	100001337		5450	277.217
	1060			dihomo-linolenate (20:3n3 or n6)	LC/MS neg	35718	C03242	HMDB02925	5280581					0.82	0.63	1.14	0.87		0.0017	0.0017	0.9681	0.4446	0.1997	0.1415	0.1402	0.103	0.0022	0.0045	0.3757	0.2161	0.3467	0.3715		1.1712	1.34	0.9582	0.8376		100	100	100	100		Lipid	Polyunsaturated Fatty Acid (n3 and n6)	100001739	17046-59-2	5596	305.249
	1061			arachidonate (20:4n6)	LC/MS neg	1110	C00219	HMDB01043	444899					1.27	1.11	1.53	1.33		0.0703	0.0352	0.0004	0.0012	0.3963	0.2138	0.0625	0.0544	0.4766	0.2916	0.0018	0.0032	0.0347	0.0928		0.7368	1.1273	0.9386	1.2465		100	100	100	100		Lipid	Polyunsaturated Fatty Acid (n3 and n6)	229	506-32-1	5535	303.233
	1062			adrenate (22:4n6)	LC/MS neg	32980	C16527	HMDB02226	5497181					0.81	0.49	1.49	0.9		0.0177	0.0116	0.4662	0.2863	0.1775	0.1332	0.4277	0.24	0.0101	0.014	0.1447	0.109	0.6521	0.5305		1.267	1.8937	1.0281	0.9222		100	100	100	100		Lipid	Polyunsaturated Fatty Acid (n3 and n6)	100001193	2091-25-0	5678	331.264
	1063			docosapentaenoate (n6 DPA; 22:5n6)	LC/MS neg	37478	C16513	HMDB01976	6441454					0.68	0.47	1.39	0.96		7.0363e-06	1.8667e-05	0.1735	0.1406	0.0627	0.0664	0.0177	0.0214	1.3568e-05	8.6025e-05	0.0256	0.0271	0.7044	0.5434		1.2448	1.7304	0.8407	0.8094		100	100	100	100		Lipid	Polyunsaturated Fatty Acid (n3 and n6)	100001580	25182-74-5	5624.5	329.249
	1064			docosadienoate (22:2n6)	LC/MS neg	32415	C16533	HMDB61714	5282807					0.4	0.39	0.71	0.69		1.2384e-06	5.1194e-06	0.0261	0.0337	0.714	0.3026	0.0003	0.0009	8.1104e-05	0.0003	0.1728	0.1229	0.0648	0.1319		1.8815	1.3376	0.7593	0.5207		100	100	100	100		Lipid	Polyunsaturated Fatty Acid (n3 and n6)	100001182	7370-49-2	6034	335.296
	1065			dihomo-linoleate (20:2n6)	LC/MS neg	17805	C16525	HMDB05060	6439848					0.87	0.42	1.42	0.68		0.0052	0.0041	0.7283	0.3728	0.036	0.0468	0.5642	0.2884	0.0009	0.0023	0.201	0.1377	0.0817	0.1514		1.2116	1.7234	1.059	0.7179		100	100	100	100		Lipid	Polyunsaturated Fatty Acid (n3 and n6)	1231	2091-39-6	5730	307.264
	1067			mead acid (20:3n9)	LC/MS neg	35174		HMDB10378	5312531					0.78	0.71	1.16	1.06		0.0226	0.014	0.6156	0.3401	0.7139	0.3026	0.1595	0.1134	0.0589	0.0539	0.5396	0.2748	0.9233	0.6203		1.1864	1.3816	0.9207	0.9792		100	100	100	100		Lipid	Polyunsaturated Fatty Acid (n3 and n6)	100001472	20590-32-3	5650	305.249
	1118		Fatty Acid, Branched	15-methylpalmitate (isobar with 2-methylpalmitate)	LC/MS neg	38768			17903417					1.02	0.68	1.37	0.91		0.1487	0.0653	0.5198	0.3026	0.0872	0.0834	0.8403	0.3788	0.0289	0.0316	0.0975	0.0792	0.4347	0.4181		1.0326	1.4122	1.0492	0.9571		100	100	100	100		Lipid	Fatty Acid, Branched	100002945		5695	269.249
	1121			17-methylstearate	LC/MS neg	38296			3083779					0.7	0.53	1.19	0.9		0.0216	0.0135	0.9584	0.4417	0.4319	0.2277	0.2571	0.1649	0.0301	0.0323	0.6026	0.2957	0.5526	0.4775		1.5269	1.8221	1.0662	0.9618		100	100	100	100		Lipid	Fatty Acid, Branched	100002356	2724-59-6	5993	297.28
	1129		Fatty Acid, Dicarboxylate	dimethylmalonic acid	LC/MS polar	42978		HMDB02001	11686					0.62	0.77	1.23	1.53		0.0116	0.008	0.0422	0.049	0.4643	0.2359	0.0215	0.0244	0.1767	0.1304	0.3352	0.1987	0.052	0.1146		0.9241	1.1329	0.5722	0.8752		88	88	38	75		Lipid	Fatty Acid, Dicarboxylate	100004251	595-46-0	2702	131.035
	1132			2-hydroxyglutarate	GC/MS	37253	C02630	HMDB00606	43					0.86	0.73	1.2	1.01		0.0097	0.0069	0.46	0.2838	0.2224	0.1516	0.2886	0.1783	0.0082	0.0117	0.1689	0.122	0.727	0.5536		1.0676	1.2809	0.919	0.9327		100	100	100	100		Lipid	Fatty Acid, Dicarboxylate	100002070	40951-21-1	1576	247
	1134			adipate	LC/MS pos	21134	C06104	HMDB00448	196					0.7	0.49	1	0.71		3.1396e-06	9.5378e-06	0.1854	0.146	0.1487	0.1206	0.0049	0.008	1.8347e-05	0.0001	0.929	0.3868	0.0541	0.118		1.3132	1.3161	0.9137	0.6476		100	100	100	100		Lipid	Fatty Acid, Dicarboxylate	100000863	124-04-9	2460.4	147.065
	1135			2-hydroxyadipate	LC/MS polar	31934	C02360	HMDB00321	193530					0.67	1.05	0.85	1.33		0.1271	0.0573	0.9045	0.4307	0.2511	0.1628	0.0624	0.0544	0.7791	0.4259	0.4636	0.2466	0.3684	0.385		1.2695	1.074	0.8491	1.1256		100	100	100	100		Lipid	Fatty Acid, Dicarboxylate	100001153	18294-85-4	3000	161.046
	1136			3-methyladipate	LC/MS polar	36749		HMDB00555	12292					1.4	1.09	0.73	0.57		0.187	0.079	0.0016	0.0036	0.3301	0.1907	0.1086	0.0827	0.8001	0.4351	0.087	0.0727	0.0036	0.0228		1.0798	0.7907	1.5074	0.8643		100	100	100	100		Lipid	Fatty Acid, Dicarboxylate	100001765	3058-01-03	2865	159.066
	1139			pimelate (heptanedioate)	LC/MS polar	15704	C02656	HMDB00857	385					0.84	0.51	1.13	0.68		7.1394e-05	0.0001	0.2936	0.2038	0.0258	0.0388	0.1151	0.0865	3.1304e-05	0.0002	0.3716	0.2152	0.0222	0.072		1.1793	1.3292	0.9898	0.6761		100	100	100	100		Lipid	Fatty Acid, Dicarboxylate	100000101	111-16-0	2745	159.066
	1141			suberate (octanedioate)	LC/MS neg	15730	C08278	HMDB00893	10457					0.92	0.52	1.37	0.78		7.1246e-05	0.0001	0.5446	0.3135	0.0031	0.0087	0.3261	0.1964	5.6474e-06	4.9234e-05	0.0109	0.0138	0.0737	0.1416		1.013	1.3922	0.9278	0.7241		100	100	100	100		Lipid	Fatty Acid, Dicarboxylate	100000016	505-48-6	804.3	173.082
	1144			azelate (nonanedioate)	LC/MS neg	18362	C08261	HMDB00784	2266					1.02	0.59	1.49	0.86		0.0006	0.0008	0.0772	0.0779	0.0007	0.0034	0.9882	0.4199	8.8508e-06	6.4456e-05	0.0004	0.001	0.1712	0.2314		0.9893	1.4705	1.0074	0.8638		100	100	100	100		Lipid	Fatty Acid, Dicarboxylate	2029	123-99-9	1276	187.098
	1145			sebacate (decanedioate)	LC/MS neg	32398	C08277	HMDB00792	5192					1	0.58	1.55	0.9		0.0015	0.0015	0.0478	0.0534	0.0026	0.008	0.876	0.3879	4.3924e-05	0.0002	0.0007	0.0015	0.3899	0.3948		0.9422	1.456	0.9377	0.84		100	100	100	100		Lipid	Fatty Acid, Dicarboxylate	100001211	111-20-6	1788	201.113
	1146			undecanedioate	LC/MS neg	42395		HMDB00888	15816					1.06	0.58	1.58	0.86		0.0019	0.0018	0.0466	0.0529	0.0006	0.0032	0.7455	0.3539	1.6831e-05	0.0001	0.0002	0.0006	0.21	0.2585		0.9586	1.5148	1.0169	0.8725		100	100	100	100		Lipid	Fatty Acid, Dicarboxylate	100001617	1852-04-6	2440	215.129
	1147			1,11-undecanedicarboxylate	LC/MS neg	43027		HMDB02327	10458					1.06	0.55	1.51	0.79		0.001	0.0011	0.2255	0.1662	0.0004	0.0027	0.8283	0.3777	9.0108e-06	6.4456e-05	0.001	0.0019	0.0626	0.1303		0.9723	1.4709	1.0264	0.8147		100	100	100	100		Lipid	Fatty Acid, Dicarboxylate	100004262	505-52-2	3530	243.16
	1148			dodecanedioate	LC/MS neg	32388	C02678	HMDB00623	12736					1.04	0.58	1.56	0.87		0.0027	0.0024	0.0575	0.0628	0.0015	0.0057	0.8773	0.3879	4.5697e-05	0.0002	0.0006	0.0012	0.2867	0.3268		0.9408	1.4679	0.9775	0.8511		100	100	100	100		Lipid	Fatty Acid, Dicarboxylate	100001102	693-23-2	2990	229.145
	1149			tetradecanedioate	LC/MS neg	35669		HMDB00872	13185					1.13	0.53	1.75	0.81		0.0083	0.006	0.0709	0.0739	0.0011	0.0052	0.5772	0.2931	8.7205e-05	0.0004	0.0005	0.0012	0.2235	0.2714		0.8801	1.541	0.9975	0.8118		100	100	100	100		Lipid	Fatty Acid, Dicarboxylate	100001613	821-38-5	4000	257.176
	1150			hexadecanedioate	LC/MS neg	35678	C19615	HMDB00672	10459					1.26	0.78	1.19	0.74		0.9192	0.2997	0.3127	0.2139	0.0055	0.0128	0.0491	0.0454	0.0361	0.0374	0.1717	0.1228	0.008	0.0377		0.9148	1.0912	1.157	0.854		100	100	100	100		Lipid	Fatty Acid, Dicarboxylate	100001614	505-54-4	4615	285.207
	1151			octadecanedioate	LC/MS neg	36754		HMDB00782	70095					1.11	1.05	0.93	0.88		0.1994	0.0833	0.1016	0.095	0.5923	0.2744	0.2	0.1341	0.5892	0.3475	0.4225	0.2301	0.1253	0.1942		0.9798	0.9137	1.0873	0.9553		100	100	100	100		Lipid	Fatty Acid, Dicarboxylate	100001615	871-70-5	5042.9	313.238
	1152			eicosanodioate	LC/MS neg	39831			75502					0.94	0.82	0.93	0.81		0.018	0.0118	0.0126	0.0187	0.2212	0.1516	0.3798	0.2203	0.0127	0.0164	0.3258	0.1952	0.0098	0.0437		1.1172	1.0425	1.0535	0.8503		100	100	100	100		Lipid	Fatty Acid, Dicarboxylate	100002951	2424-92-2	5200.9	341.27
	1185		Fatty Acid, Amino	2-aminoheptanoate	LC/MS pos	43761			227939					0.81	0.75	1.15	1.06		0.0006	0.0007	0.1733	0.1406	0.6274	0.2839	0.0241	0.0263	0.0046	0.0075	0.1926	0.1332	0.5267	0.463		1.0397	1.1991	0.8411	0.8948		100	100	100	100		Lipid	Fatty Acid, Amino	100004542	1115-90-8	2530	146.118
	1190			2-aminooctanoate	LC/MS pos	43343		HMDB00991	69522					1.71	0.95	1.47	0.81		0.0009	0.001	0.226	0.1662	6.2746e-05	0.0008	2.1143e-06	2.2744e-05	0.4883	0.2974	0.0002	0.0006	0.0208	0.0708		0.7011	1.0282	1.2002	0.9767		100	100	100	100		Lipid	Fatty Acid, Amino	100004227	644-90-6	3355	160.133
	1192		Fatty Acid, Keto	1-dihomo-linoleoylglycerol (20:2)	LC/MS neg	35103								0.53	0.45	1.14	0.96		8.0603e-06	2.107e-05	0.6163	0.3401	0.2849	0.1751	0.0046	0.0075	7.6974e-05	0.0003	0.2684	0.1682	0.683	0.5365		1.4787	1.6862	0.7886	0.7565		100	100	100	100		Lipid	Fatty Acid, Keto	100001483		6800	307.264
	1199		Fatty Acid Synthesis	malonate	LC/MS polar	15872	C00383	HMDB00691	867					0.78	0.91	1.06	1.25		0.0648	0.0329	0.1118	0.1012	0.329	0.1905	0.0486	0.0453	0.5166	0.3106	0.6501	0.3089	0.0729	0.1416		1.1414	1.2155	0.8909	1.112		100	100	100	100		Lipid	Fatty Acid Synthesis	818	141-82-2;26522-22-85-0	3447	103.004
	1200			2-methylmalonyl carnitine	LC/MS pos	35482		HMDB13133	53481628					1.01	0.98	0.87	0.84		0.9468	0.3055	0.4814	0.2888	0.6726	0.2948	0.8011	0.3714	0.7292	0.4093	0.8409	0.3662	0.4267	0.4157		0.912	0.794	0.9192	0.7752		63	63	88	50		Lipid	Fatty Acid Synthesis	100001596	149181-64-6	1552.7	262.129
	1212		Fatty Acid Metabolism (also BCAA Metabolism)	butyrylcarnitine	LC/MS pos	32412	C02862	HMDB02013	439829					0.74	0.9	0.62	0.76		0.0499	0.0265	0.0004	0.0012	0.4155	0.2218	0.0515	0.0473	0.3944	0.2512	0.0019	0.0033	0.0318	0.089		1.4839	0.9227	1.1022	0.8324		100	100	100	100		Lipid	Fatty Acid Metabolism (also BCAA Metabolism)	100001054	25576-40-3	1977	232.154
	1213			butyrylglycine	LC/MS neg	31850		HMDB00808	88412					0.95	1.35	0.43	0.6		0.425	0.1597	9.7528e-06	5.2793e-05	0.3258	0.1905	0.8937	0.3924	0.2112	0.1511	0.0001	0.0003	0.0044	0.0259		1.3505	0.5749	1.2877	0.7733		100	100	100	100		Lipid	Fatty Acid Metabolism (also BCAA Metabolism)	100001151	20208-73-5	1470	144.067
	1215			propionylcarnitine	LC/MS pos	32452	C03017	HMDB00824	107738					0.82	1	0.62	0.75		0.0871	0.0425	1.0474e-06	7.8374e-06	0.0948	0.0879	0.0196	0.0227	0.9755	0.493	5.2192e-06	2.5888e-05	0.0037	0.0229		1.3958	0.8612	1.1384	0.857		100	100	100	100		Lipid	Fatty Acid Metabolism (also BCAA Metabolism)	100001162	17298-37-2	1590	218.139
	1216			propionylglycine	LC/MS neg	31932		HMDB00783	98681					0.68	1.22	0.47	0.84		0.3362	0.1308	7.6334e-07	6.2647e-06	0.0005	0.0028	0.0016	0.0031	0.0438	0.0436	6.3792e-08	6.931e-07	0.1059	0.1754		1.5743	0.736	1.0691	0.8961		100	100	100	100		Lipid	Fatty Acid Metabolism (also BCAA Metabolism)	100001150	21709-90-0	960	130.051
	1221		Fatty Acid Metabolism(Acyl Glycine)	hexanoylglycine	LC/MS neg	35436		HMDB00701	99463					2.88	1.84	0.99	0.63		0.0001	0.0002	0.1154	0.1037	0.1696	0.1301	0.0003	0.0009	0.0439	0.0436	0.8804	0.3748	0.0407	0.1007		0.7748	0.7659	2.2346	1.4059		100	100	100	100		Lipid	Fatty Acid Metabolism(Acyl Glycine)	100001527	24003-67-6	2900	172.098
	1222			heptanoyl glycine	LC/MS neg	42629			10932172					1.43	1.5	0.55	0.57		0.0114	0.0079	0.0007	0.0018	0.6987	0.2994	0.1127	0.085	0.037	0.0382	0.0059	0.0084	0.0218	0.0719		1.1439	0.6249	1.6404	0.9362		100	88	100	100		Lipid	Fatty Acid Metabolism(Acyl Glycine)	100004195	23783-23-5	3720	186.114
	1223			N-octanoylglycine	LC/MS neg	43502		HMDB00832	84290					2.41	1.34	1.11	0.62		0.0021	0.002	0.1699	0.1386	0.1652	0.129	0.002	0.0038	0.1757	0.1301	0.9909	0.4037	0.0549	0.118		0.747	0.8301	1.8017	1.1124		100	100	100	100		Lipid	Fatty Acid Metabolism(Acyl Glycine)	100003940	14246-53-8	4335.4	200.129
	1229		Fatty Acid Metabolism(Acyl Carnitine)	acetylcarnitine	LC/MS pos	32198	C02571	HMDB00201	1					1.02	1.02	0.9	0.9		0.7716	0.2607	0.0318	0.0391	0.9949	0.3746	0.8338	0.378	0.8408	0.4502	0.1224	0.0963	0.1203	0.1906		1.0429	0.9368	1.0647	0.9596		100	100	100	100		Lipid	Fatty Acid Metabolism(Acyl Carnitine)	100000802	5080-50-2	1166.9	204.123
	1230			hydroxybutyrylcarnitine*	LC/MS pos	43264		HMDB13127	53481617					1.89	1.24	0.84	0.55		0.0252	0.0154	0.0047	0.0093	0.1068	0.095	0.0081	0.0116	0.6255	0.3658	0.3297	0.1969	0.0023	0.0171		1.0526	0.8806	1.9922	1.0947		100	100	100	100		Lipid	Fatty Acid Metabolism(Acyl Carnitine)	100003926		1477	248.149
	1231			valerylcarnitine	LC/MS pos	34406		HMDB13128	6426903					1.02	1.12	0.66	0.73		0.4026	0.1529	0.0001	0.0004	0.6452	0.287	0.7877	0.3677	0.3602	0.2332	0.0016	0.0028	0.0082	0.0377		1.1866	0.7857	1.2096	0.8789		100	100	100	100		Lipid	Fatty Acid Metabolism(Acyl Carnitine)	100001394		2555	246.17
	1232			hexanoylcarnitine	LC/MS pos	32328		HMDB00705	6426853					1.18	0.89	0.89	0.67		0.7331	0.2516	0.1098	0.101	0.1902	0.1386	0.2429	0.1562	0.4861	0.2967	0.8288	0.3623	0.0433	0.1037		1.0353	0.9194	1.2224	0.8188		100	100	100	100		Lipid	Fatty Acid Metabolism(Acyl Carnitine)	100000781	6920-35-0	3194	260.186
	1233			octanoylcarnitine	LC/MS pos	33936	C02838	HMDB00791	123701					1.22	1.02	0.79	0.66		0.4046	0.1533	0.0847	0.0835	0.247	0.1609	0.1625	0.1141	0.8139	0.4409	0.6721	0.3149	0.0449	0.1054		1.0378	0.8207	1.265	0.8347		100	100	100	100		Lipid	Fatty Acid Metabolism(Acyl Carnitine)	100001247	3671-77-0	4090	288.217
	1237			cis-4-decenoyl carnitine	LC/MS pos	38178								2.03	1	1.24	0.61		0.0112	0.0078	0.3326	0.2233	0.01	0.0189	0.0006	0.0014	0.9723	0.4923	0.2188	0.1464	0.013	0.0538		0.7194	0.8917	1.4578	0.895		100	100	100	100		Lipid	Fatty Acid Metabolism(Acyl Carnitine)	100002259	98930-66-6	4468	314.233
	1238			laurylcarnitine	LC/MS pos	34534		HMDB02250	10427569					1.59	1.1	1.12	0.78		0.0401	0.0227	0.6164	0.3401	0.1061	0.095	0.0115	0.0154	0.7351	0.4102	0.4177	0.2296	0.135	0.2028		0.8597	0.9646	1.3668	1.0625		100	100	100	100		Lipid	Fatty Acid Metabolism(Acyl Carnitine)	100001392	25518-54-1	5070	344.28
	1239			myristoylcarnitine	LC/MS pos	33952		HMDB05066	53477791					1.01	0.97	0.96	0.92		0.8853	0.2914	0.841	0.4115	0.8111	0.3301	0.7864	0.3677	0.9465	0.4836	0.9783	0.4007	0.756	0.5615		1.0223	0.9769	1.0278	0.95		100	100	100	100		Lipid	Fatty Acid Metabolism(Acyl Carnitine)	100001270	18822-89-4	5142.1	372.311
	1241			palmitoylcarnitine	LC/MS pos	44681	C02990	HMDB00222	461					1.58	1.24	1.21	0.95		0.0005	0.0006	0.4343	0.2728	0.2359	0.158	0.001	0.0023	0.0621	0.0562	0.1674	0.1215	0.7698	0.5618		0.7778	0.9393	1.2295	1.1674		100	100	100	100		Lipid	Fatty Acid Metabolism(Acyl Carnitine)	100000776	6865-14-1	5204	400.342
	1242			stearoylcarnitine	LC/MS pos	34409		HMDB00848	6426855					1.22	1.34	1.1	1.21		0.0016	0.0016	0.0479	0.0534	0.4275	0.2259	0.0674	0.058	0.0051	0.0081	0.379	0.2168	0.0517	0.1146		0.848	0.9364	1.0337	1.2531		100	100	100	100		Lipid	Fatty Acid Metabolism(Acyl Carnitine)	100001391	18822-91-8	5256	428.373
	1243			linoleoylcarnitine*	LC/MS pos	46223		HMDB06469	6450015					2.5	1.45	1.59	0.92		2.311e-06	7.6071e-06	0.129	0.112	0.033	0.0459	3.4306e-06	2.7833e-05	0.0149	0.0185	0.0119	0.0147	0.6353	0.525		0.5687	0.9038	1.4208	1.306		100	100	100	100		Lipid	Fatty Acid Metabolism(Acyl Carnitine)	100003151	36816-10-1	5190	424.342
	1244			oleoylcarnitine	LC/MS pos	35160		HMDB05065	6441392;53477789					2.96	1.4	1.89	0.89		1.3647e-06	5.3906e-06	0.0375	0.0446	0.0053	0.0128	5.4212e-07	8.0186e-06	0.0375	0.0386	0.001	0.002	0.5589	0.4818		0.4602	0.8679	1.3606	1.2113		100	100	100	100		Lipid	Fatty Acid Metabolism(Acyl Carnitine)	100001501	38677-66-6	5215	426.358
	1246			myristoleoylcarnitine*	LC/MS pos	48182								2.19	1.45	1.27	0.84		0.0003	0.0004	0.6417	0.3481	0.0968	0.0887	0.0003	0.0008	0.0918	0.076	0.1329	0.1028	0.385	0.393		0.615	0.7821	1.3474	1.1323		100	100	100	100		Lipid	Fatty Acid Metabolism(Acyl Carnitine)	100006051	889848-55-9	5120	370.295
	1247		Carnitine Metabolism	deoxycarnitine	LC/MS pos	36747	C01181	HMDB01161	134					0.81	0.65	1.48	1.18		3.647e-08	2.701e-07	4.3802e-07	3.8427e-06	0.0182	0.0308	0.0015	0.0029	1.0756e-07	2.7278e-06	6.3724e-07	4.6902e-06	0.0081	0.0377		1.0312	1.5229	0.8353	0.9898		100	100	100	100		Lipid	Carnitine Metabolism	100001662	6249-56-5	742.4	146.118
	1248			carnitine	LC/MS pos	15500	C00318	HMDB00062	10917					1.02	1.06	0.97	1.01		0.3592	0.1388	0.6016	0.3364	0.6492	0.2877	0.7408	0.3535	0.3334	0.2183	0.4906	0.2556	0.9619	0.6356		1.0165	0.981	1.0359	1.0436		100	100	100	100		Lipid	Carnitine Metabolism	100000007	461-05-2	688.9	162.112
	1253		Ketone Bodies	3-hydroxybutyrate (BHBA)	LC/MS polar	542	C01089	HMDB00357	441					1.33	1.29	0.73	0.71		0.0484	0.0263	0.0047	0.0093	0.9791	0.3705	0.1506	0.1087	0.1608	0.1216	0.04	0.0395	0.0369	0.0939		1.1059	0.8022	1.4657	1.038		100	100	100	100		Lipid	Ketone Bodies	254	625-72-9	1443.3	103.04
	1255		Fatty Acid, Monohydroxy	4-hydroxybutyrate (GHB)	LC/MS pos	34585	C00989	HMDB00710	10413					1.04	0.6	1.18	0.68		0.1185	0.0548	0.6232	0.3419	0.1613	0.1267	0.9042	0.3948	0.0398	0.0403	0.5109	0.2631	0.182	0.2402		1.1403	1.3508	1.1848	0.8066		100	88	100	100		Lipid	Fatty Acid, Monohydroxy	100001507	502-85-2	1480	87.0441
	1256			alpha-hydroxycaproate	LC/MS neg	37073		HMDB01624	99824					1.11	0.72	1.59	1.03		0.313	0.1231	0.0399	0.047	0.0338	0.0462	0.4014	0.2298	0.0288	0.0316	0.0044	0.0065	0.9566	0.6333		0.8552	1.3592	0.9482	0.9761		100	100	100	100		Lipid	Fatty Acid, Monohydroxy	100001723	6064-63-7	1920	131.071
	1257			2-hydroxyoctanoate	LC/MS neg	22036		HMDB02264	94180					1.16	0.74	1.48	0.94		0.1593	0.0694	0.0031	0.0065	0.0001	0.0011	0.044	0.0427	0.0003	0.0009	8.7629e-06	3.9204e-05	0.4078	0.406		0.8619	1.2723	0.9983	0.943		100	100	100	100		Lipid	Fatty Acid, Monohydroxy	100000743	617-73-2	3736.8	159.103
	1258			2-hydroxydecanoate	LC/MS neg	42489			21488					0.92	0.7	1.14	0.87		0.0065	0.0048	0.9904	0.4507	0.0932	0.087	0.402	0.2298	0.0026	0.0051	0.2262	0.1487	0.2325	0.2786		1.0982	1.2499	1.007	0.8727		100	100	100	100		Lipid	Fatty Acid, Monohydroxy	100004089	5393-81-7	4840	187.134
	1260			2-hydroxypalmitate	LC/MS neg	35675		HMDB31057	92836					1.41	1	1.41	1.01		0.2211	0.0912	0.1765	0.1425	0.1087	0.0951	0.0491	0.0454	0.7764	0.4259	0.0401	0.0395	0.8498	0.6035		0.8187	1.158	1.1524	1.1637		100	100	100	100		Lipid	Fatty Acid, Monohydroxy	100001579	764-67-0	5511.2	271.228
	1261			2-hydroxystearate	LC/MS neg	17945	C03045		69417					1.02	0.95	1.31	1.22		0.949	0.3055	0.0282	0.0357	0.5743	0.2685	0.7243	0.347	0.6579	0.3792	0.0511	0.0473	0.2273	0.2751		0.9076	1.1884	0.9281	1.1338		100	100	100	100		Lipid	Fatty Acid, Monohydroxy	1239	629-22-1	5695	299.259
	1264			3-hydroxyoctanoate	LC/MS neg	22001		HMDB01954	26613					1.74	0.56	1.33	0.43		0.9943	0.3156	0.0941	0.0897	0.0082	0.0168	0.0545	0.0489	0.0534	0.0505	0.4382	0.2358	0.0031	0.021		0.9248	1.2318	1.6075	0.6845		100	100	100	100		Lipid	Fatty Acid, Monohydroxy	100000773	88930-08-9	3446	159.103
	1265			3-hydroxydecanoate	LC/MS neg	22053		HMDB02203	26612					1.69	0.48	1.27	0.36		0.665	0.2318	0.0693	0.0725	0.0173	0.0295	0.1502	0.1087	0.045	0.0445	0.654	0.3089	0.0041	0.0251		1.0532	1.3395	1.7826	0.6478		100	100	100	100		Lipid	Fatty Acid, Monohydroxy	100000997	5561-87-5	4634.7	187.134
	1267			3-hydroxylaurate	LC/MS neg	32457		HMDB00387	94216					1.81	0.41	1.71	0.38		0.7578	0.2576	0.2228	0.1662	0.0263	0.039	0.1613	0.1136	0.0707	0.0628	0.4435	0.238	0.0169	0.0646		1.0556	1.8016	1.9115	0.735		100	100	100	100		Lipid	Fatty Acid, Monohydroxy	100001112	53941-38-1	5175	215.165
	1269			3-hydroxymyristate	LC/MS neg	21158			16064					2.23	0.52	2.24	0.53		0.7001	0.2421	0.8692	0.418	0.0127	0.0228	0.0396	0.0394	0.119	0.0951	0.0883	0.0735	0.0552	0.118		0.9573	2.1458	2.1329	1.1245		100	100	100	100		Lipid	Fatty Acid, Monohydroxy	100000882	3422-31-9	5335	243.197
	1270			3-hydroxypalmitate	LC/MS neg	27503		HMDB10734	301590					1.33	0.56	1.42	0.6		0.5114	0.1852	0.6769	0.3604	0.0159	0.0273	0.1896	0.1285	0.0301	0.0323	0.1405	0.1069	0.0437	0.104		1.1911	1.69	1.5883	0.9469		100	100	100	100		Lipid	Fatty Acid, Monohydroxy	100000983	928-17-6	5476	271.228
	1272			5-hydroxyhexanoate	LC/MS neg	31938		HMDB00525	170748					1.02	0.71	1.26	0.88		0.0217	0.0135	0.4065	0.2599	0.005	0.0122	0.665	0.3258	0.0006	0.0016	0.0103	0.0132	0.1299	0.199		0.9661	1.2169	0.9885	0.8667		100	100	100	100		Lipid	Fatty Acid, Monohydroxy	100001148	44843-89-2	1267	131.071
	1273			5-hydroxydecanoate	LC/MS neg	43011			1825					1.12	0.78	1.47	1.02		0.1769	0.0752	0.0007	0.002	0.0026	0.008	0.1864	0.1279	0.0025	0.0051	2.6974e-05	9.769e-05	0.735	0.5539		0.8818	1.2945	0.9887	1.0046		100	100	100	100		Lipid	Fatty Acid, Monohydroxy	100004091	624-00-0	4080	187.134
	1277			8-hydroxyoctanoate	LC/MS neg	21239		HMDB00711	69820					1.13	0.66	1.65	0.97		0.0411	0.023	0.0019	0.0042	0.0006	0.0034	0.2362	0.1535	0.0002	0.0008	1.8258e-05	7.0606e-05	0.7691	0.5618		0.8547	1.4083	0.9647	0.9349		100	100	100	100		Lipid	Fatty Acid, Monohydroxy	100000956	764-89-6	2300.4	159.103
	1279			16-hydroxypalmitate	LC/MS neg	39609	C18218	HMDB06294	10466					1.1	0.73	1.21	0.8		0.3734	0.1431	0.7195	0.3706	0.0621	0.0661	0.4687	0.2527	0.0537	0.0506	0.2732	0.1698	0.1141	0.1827		0.9786	1.1793	1.0716	0.8608		100	100	100	100		Lipid	Fatty Acid, Monohydroxy	100002953	506-13-8	5236.2	271.228
	1280			17-HDoHe	LC/MS neg	48855		HMDB10213	6439179					1.63	0.33	2.29	0.47		0.1856	0.0785	0.7364	0.3748	0.0491	0.056	0.6246	0.3125	0.0226	0.0263	0.1012	0.0819	0.2349	0.2805		1.2191	2.7869	1.9927	0.9325		100	100	100	100		Lipid	Fatty Acid, Monohydroxy	100002169	90780-52-2	5295	343.228
	1284			13-HODE + 9-HODE	LC/MS neg	37752			43013					1.06	0.36	1.92	0.65		0.0036	0.003	0.5052	0.2963	0.0024	0.0075	0.9136	0.3974	8.0235e-05	0.0003	0.0084	0.0114	0.0701	0.1385		1.0377	1.9905	1.1019	0.7212		100	100	100	100		Lipid	Fatty Acid, Monohydroxy	100002196		5275	295.228
	1294		Fatty Acid, Dihydroxy	12,13-DiHOME	LC/MS neg	38395	C14829	HMDB04705	10236635					1.14	0.73	1.78	1.15		0.6298	0.2226	0.0738	0.0757	0.1083	0.0951	0.4144	0.2357	0.1403	0.109	0.0191	0.0213	0.8895	0.6125		0.8305	1.4818	0.9431	1.0856		100	100	100	100		Lipid	Fatty Acid, Dihydroxy	62	263399-35-5	5137	313.238
	1295			9,10-DiHOME	LC/MS neg	38399	C14828	HMDB04704	9966640					1.14	0.53	1.61	0.74		0.0946	0.0451	0.7266	0.3728	0.0072	0.0156	0.4162	0.2362	0.0028	0.0055	0.0292	0.0302	0.0828	0.1526		0.9003	1.4483	1.025	0.7633		100	100	100	100		Lipid	Fatty Acid, Dihydroxy	179	263399-34-4	5180	313.238
	1310		Eicosanoid	thromboxane B2	LC/MS neg	17807	C05963	HMDB03252	5283137					1.33	1.31	1.33	1.31		0.2496	0.1017	0.1131	0.102	0.9197	0.3568	0.3741	0.218	0.4539	0.2808	0.2295	0.1505	0.2873	0.3268		0.7031	0.9338	0.9355	1.2243		100	100	88	100		Lipid	Eicosanoid	1308	54397-85-2	4526	369.228
	1357			12-HEPE	LC/MS neg	46293		HMDB10202	10041593					1.11	0.45	1.78	0.73		0.1188	0.0548	0.4572	0.2835	0.618	0.2814	0.4411	0.2445	0.1462	0.1127	0.3812	0.2168	0.8612	0.6035		1.0561	1.8836	1.1679	0.8541		100	100	100	100		Lipid	Eicosanoid	100002165	81187-21-5	5265	317.212
	1365			12-HETE	LC/MS neg	37536		HMDB06111	5312983					1.76	0.94	1.93	1.03		0.9883	0.3147	0.1603	0.132	0.6579	0.2896	0.7461	0.3539	0.7618	0.4209	0.1922	0.1332	0.4876	0.4431		0.7595	1.4664	1.3393	1.3804		100	100	100	100		Lipid	Eicosanoid	100002167	71030-37-0;73837-14-6	5326	319.228
	1375		Endocannabinoid	oleic ethanolamide	LC/MS neg	38102		HMDB02088	5283454					2.23	0.73	2.85	0.93		0.0919	0.044	0.0043	0.0086	0.0003	0.0021	0.0003	0.0008	0.1059	0.0862	2.1126e-05	8.0337e-05	0.4837	0.4424		0.6069	1.7309	1.3542	1.2624		100	100	100	100		Lipid	Endocannabinoid	1137	11-58-0;111-58-0	6900	324.291
	1378			palmitoyl ethanolamide	LC/MS neg	38165	C16512	HMDB02100	4671					1.1	0.57	1.83	0.96		0.0331	0.0194	0.0131	0.0191	0.0031	0.0088	0.4892	0.2596	0.0006	0.0016	0.0003	0.0007	0.6836	0.5365		0.8853	1.6209	0.973	0.9314		100	100	100	100		Lipid	Endocannabinoid	1489	544-31-0	6760	298.275
	1385			N-oleoyltaurine	LC/MS neg	39732			6437033					2.19	0.8	2.31	0.84		0.0929	0.0444	0.0598	0.0648	0.0035	0.0094	0.0017	0.0032	0.3156	0.2086	0.0011	0.0022	0.3944	0.3982		0.5968	1.3802	1.3089	1.0974		50	100	100	100		Lipid	Endocannabinoid	100003119	52514-04-2	5610	388.253
	1386			N-stearoyltaurine	LC/MS neg	39730			168274					0.68	0.53	1.49	1.16		0.0011	0.0012	0.0755	0.0771	0.4917	0.2424	0.0479	0.045	0.0049	0.0079	0.083	0.0701	0.4232	0.4145		1.1342	1.6933	0.7694	0.89		100	100	100	100		Lipid	Endocannabinoid	100003240	63155-80-6	5782	390.268
	1387			N-palmitoyltaurine	LC/MS neg	39835								0.93	0.69	1.51	1.12		0.2567	0.1039	0.2704	0.1901	0.5978	0.2752	0.6623	0.3257	0.2417	0.1661	0.2509	0.1604	0.6794	0.5356		1.0572	1.5937	0.9867	1.1029		88	100	88	100		Lipid	Endocannabinoid	100003239	83982-06-3	5560	362.237
	1390		Inositol Metabolism	myo-inositol	LC/MS polar	1124	C00137	HMDB00211	892					1.17	0.81	1.46	1.01		0.7531	0.2569	0.0086	0.0144	0.0074	0.0157	0.0798	0.0647	0.0313	0.0332	0.0004	0.0009	0.9649	0.6357		0.8064	1.1791	0.9475	0.9559		100	100	100	100		Lipid	Inositol Metabolism	363	87-89-8	3506.3	225.062
	1391			chiro-inositol	LC/MS polar	37112	C19891	HMDB34220						0.4	0.76	0.86	1.63		0.0044	0.0035	0.6524	0.3509	0.1245	0.1064	0.0026	0.0046	0.2925	0.1966	0.4317	0.2329	0.1605	0.2246		1.6551	1.4237	0.6652	1.0812		100	100	88	88		Lipid	Inositol Metabolism	100001859	643-12-9	3191.2	225.062
	1398			inositol 1-phosphate (I1P)	GC/MS	1481	C04006	HMDB00213	440194					0.77	0.91	0.94	1.11		0.0917	0.044	0.8538	0.4145	0.5446	0.2598	0.1063	0.0822	0.4297	0.2676	0.5764	0.2865	0.7647	0.5618		1.1787	1.1111	0.9092	1.008		100	88	100	100		Lipid	Inositol Metabolism	370	573-35-3;106032-59-1	2057.8	318.1
	1417		Phospholipid Metabolism	choline	LC/MS pos	15506	C00114	HMDB00097	305					0.8	0.56	1.05	0.73		1.2735e-06	5.1446e-06	0.0929	0.0894	0.0202	0.0325	0.0149	0.0184	1.4751e-06	1.7892e-05	0.6128	0.2985	0.006	0.0304		1.0947	1.1537	0.8794	0.6446		100	100	100	100		Lipid	Phospholipid Metabolism	1256	67-48-1	675	104.107
	1418			choline phosphate	LC/MS polar	34396	C00588	HMDB01565	1014					0.97	0.72	1.32	0.98		0.1747	0.0745	0.427	0.2709	0.1725	0.1313	0.9958	0.4211	0.0582	0.0536	0.13	0.1012	0.6777	0.5356		0.9842	1.298	0.955	0.9362		100	100	100	100		Lipid	Phospholipid Metabolism	267	72556-74-2	4730	228.064
	1420			glycerophosphorylcholine (GPC)	LC/MS pos	15990	C00670	HMDB00086	71920					0.95	1.12	1.01	1.19		0.7556	0.2573	0.1958	0.1518	0.2466	0.1609	0.5438	0.2816	0.2986	0.1988	0.9207	0.3848	0.0869	0.1569		0.9768	0.9835	0.9271	1.0998		100	100	100	100		Lipid	Phospholipid Metabolism	100000269	28319-77-9	709.9	258.11
	1424			phosphoethanolamine	LC/MS neg	1600	C00346	HMDB00224	1015					1.28	0.83	1.55	1		0.9147	0.2997	0.0935	0.0894	0.0502	0.0569	0.1389	0.1027	0.1814	0.1328	0.0123	0.0151	0.8281	0.5966		0.7936	1.2291	1.0185	1.0142		100	100	100	100		Lipid	Phospholipid Metabolism	1026	1071-23-4	638	140.012
	1426			glycerophosphoethanolamine	LC/MS polar	37455	C01233	HMDB00114	123874					0.81	0.78	1.28	1.22		0.0053	0.0041	0.0136	0.0194	0.8325	0.335	0.0567	0.0507	0.0298	0.0322	0.0537	0.0485	0.0979	0.1684		1.0578	1.3517	0.8608	1.0492		100	100	100	100		Lipid	Phospholipid Metabolism	100001620	33049-08-0	3075	214.049
	1428			glycerophosphoinositol*	LC/MS polar	47155								0.98	0.76	1.09	0.85		0.0298	0.0177	0.6235	0.3419	0.0418	0.0511	0.9129	0.3974	0.0041	0.0069	0.2568	0.1628	0.0735	0.1416		1.0213	1.1183	0.9991	0.8464		100	100	100	100		Lipid	Phospholipid Metabolism	100001621	16824-65-0	3850	333.059
	1470		Lysolipid	1-palmitoyl-GPC (16:0)	LC/MS pos	33955		HMDB10382	86554					0.95	1.36	0.75	1.07		0.0468	0.0255	0.1828	0.1454	0.0244	0.0375	0.8333	0.378	0.0038	0.0066	0.0131	0.0158	0.4793	0.4407		1.1224	0.839	1.0662	1.1369		100	100	100	100		Lipid	Lysolipid	100001263	17364-16-8	5670	496.34
	1471			2-palmitoyl-GPC (16:0)*	LC/MS pos	35253		HMDB61702	15061532					0.88	1.41	0.6	0.97		0.1264	0.0572	0.0221	0.0294	0.0364	0.0468	0.6633	0.3257	0.0125	0.0164	0.0029	0.0046	0.8743	0.6057		1.2861	0.7775	1.1322	1.0967		100	100	100	100		Lipid	Lysolipid	100001562		5610	496.34
	1472			1-palmitoleoyl-GPC (16:1)*	LC/MS pos	33230		HMDB10383	24779461					0.69	1.23	0.6	1.09		0.4956	0.1813	0.0197	0.0265	0.0015	0.0057	0.0059	0.0092	0.0548	0.0515	0.0002	0.0006	0.4631	0.4324		1.3932	0.8424	0.9575	1.0396		100	100	100	100		Lipid	Lysolipid	100001511		5525	494.324
	1473			2-palmitoleoyl-GPC (16:1)*	LC/MS pos	35819								1.07	1.27	0.85	1.01		0.0489	0.0263	0.3021	0.2083	0.2788	0.1732	0.505	0.2668	0.0334	0.0352	0.1386	0.1065	0.9703	0.6357		1.0086	0.8595	1.08	1.0874		100	100	100	100		Lipid	Lysolipid	100001561		5490	494.324
	1476			1-stearoyl-GPC (18:0)	LC/MS pos	33961		HMDB10384	497299					0.88	1.21	0.93	1.28		0.6763	0.2352	0.2411	0.1748	0.0351	0.0468	0.2154	0.1428	0.0728	0.0639	0.478	0.2527	0.0226	0.0725		1.0456	0.9679	0.9167	1.1706		100	100	100	100		Lipid	Lysolipid	100001271	19420-57-6	5847	524.371
	1477			2-stearoyl-GPC (18:0)*	LC/MS pos	35255			10208382					1.01	1.33	0.86	1.13		0.1654	0.0712	0.8461	0.4129	0.3975	0.2138	0.6925	0.3358	0.1176	0.0943	0.6426	0.3072	0.4618	0.4323		1.0414	0.8926	1.0474	1.1865		100	100	100	100		Lipid	Lysolipid	100001555		5777	524.371
	1478			1-oleoyl-GPC (18:1)	LC/MS pos	48258		HMDB02815	16081932					0.55	1.24	0.52	1.19		0.2528	0.1028	0.1516	0.1275	0.005	0.0122	0.0059	0.0092	0.1939	0.1405	0.0034	0.0053	0.2746	0.3164		1.565	0.8211	0.8539	1.0193		100	100	100	100		Lipid	Lysolipid	100001272	19420-56-5	5700	522.355
	1481			1-linoleoyl-GPC (18:2)	LC/MS pos	34419	C04100	HMDB10386	11988421					0.69	0.96	0.77	1.07		0.0229	0.0141	0.2893	0.2022	0.0363	0.0468	0.0029	0.0052	0.8841	0.4662	0.0279	0.0292	0.4354	0.4181		1.2408	0.9571	0.8594	0.9221		100	100	100	100		Lipid	Lysolipid	100001395		5575.9	520.34
	1483			1-linolenoyl-GPC (18:3)*	LC/MS pos	45951								0.55	0.87	0.83	1.31		0.0001	0.0002	0.5055	0.2963	0.0094	0.0184	2.1186e-05	0.0001	0.2577	0.1758	0.1462	0.1097	0.0209	0.0708		1.371	1.1372	0.7548	0.9887		100	100	100	100		Lipid	Lysolipid	100005350		5506	518.324
	1493			1-arachidonoyl-GPC (20:4)*	LC/MS pos	33228	C05208	HMDB10395						1.06	1.3	0.92	1.12		0.0987	0.0469	0.9257	0.4361	0.221	0.1516	0.7494	0.3547	0.0455	0.0446	0.4199	0.2296	0.3494	0.3727		1.0174	0.9322	1.0776	1.2116		100	100	100	100		Lipid	Lysolipid	100001551		5552	544.34
	1504			1-(1-enyl-palmitoyl)-GPE (P-16:0)*	LC/MS neg	39270								0.6	0.81	0.88	1.21		0.0206	0.013	0.681	0.3617	0.3001	0.1813	0.0194	0.0226	0.3314	0.2176	0.6541	0.3089	0.3071	0.3424		1.4672	1.2977	0.8739	1.0548		100	100	100	100		Lipid	Lysolipid	100003000		6285	436.283
	1505			1-(1-enyl-stearoyl)-GPE (P-18:0)*	LC/MS neg	39271								0.99	0.62	1.06	0.66		0.0272	0.0163	0.6833	0.3622	0.3624	0.2005	0.3292	0.1978	0.029	0.0316	0.7191	0.3282	0.3521	0.3741		1.1647	1.239	1.1585	0.7678		100	100	100	100		Lipid	Lysolipid	100003001		6500	464.315
	1506			1-(1-enyl-oleoyl)-GPE (P-18:1)*	LC/MS neg	44621								0.67	0.77	1.05	1.21		0.0462	0.0253	0.4607	0.2838	0.5089	0.2474	0.0615	0.0541	0.3249	0.2138	0.9559	0.3937	0.3249	0.3539		1.3817	1.4523	0.9243	1.1182		100	100	100	100		Lipid	Lysolipid	100005372		6250	462.299
	1509			1-palmitoyl-GPE (16:0)	LC/MS neg	35631		HMDB11503	9547069					0.55	0.85	0.67	1.04		0.0009	0.001	0.0652	0.0689	0.0353	0.0468	0.0003	0.0008	0.3022	0.2008	0.0068	0.0097	0.8379	0.6		1.5837	1.0572	0.8667	0.9037		100	100	100	100		Lipid	Lysolipid	100001567		6057.2	452.278
	1512			1-stearoyl-GPE (18:0)	LC/MS neg	42398		HMDB11130	9547068					1.11	0.66	1.39	0.83		0.2583	0.1044	0.8244	0.4041	0.2823	0.174	0.9678	0.4127	0.1228	0.0971	0.3585	0.2097	0.5424	0.4721		1.1351	1.5822	1.2601	1.05		100	100	100	100		Lipid	Lysolipid	100001461	69747-55-3	6514	480.31
	1513			2-stearoyl-GPE (18:0)*	LC/MS neg	41220								0.68	0.75	0.87	0.95		0.0007	0.0008	0.2674	0.1889	0.5629	0.2667	0.0043	0.0071	0.0302	0.0323	0.2348	0.1527	0.7023	0.5434		1.2566	1.0993	0.86	0.8212		100	100	100	100		Lipid	Lysolipid	100003901		6350	480.31
	1514			1-oleoyl-GPE (18:1)	LC/MS neg	35628		HMDB11506	9547071					0.44	0.54	1.01	1.23		1.7246e-07	9.211e-07	0.283	0.1983	0.2216	0.1516	3.5282e-06	2.7833e-05	0.0004	0.0013	0.9133	0.3845	0.1085	0.1777		1.4075	1.4211	0.6189	0.7632		100	100	100	100		Lipid	Lysolipid	100001569	89576-29-4	6125.1	478.294
	1518			1-linoleoyl-GPE (18:2)*	LC/MS neg	32635		HMDB11507	52925130					0.33	0.34	0.89	0.9		4.8787e-10	9.6355e-09	0.4804	0.2888	0.7846	0.3237	2.4488e-07	4.1396e-06	6.8613e-07	1.0003e-05	0.4892	0.2556	0.7584	0.5618		1.912	1.7058	0.6388	0.5734		100	100	100	100		Lipid	Lysolipid	100001570		5900	476.278
	1522			1-arachidonoyl-GPE (20:4)*	LC/MS neg	35186		HMDB11517	42607465					0.48	0.48	0.88	0.87		0.0001	0.0002	0.3859	0.2504	0.8065	0.3289	0.0022	0.0041	0.0054	0.0085	0.4318	0.2329	0.6576	0.5305		1.6177	1.4168	0.7791	0.6754		100	100	100	100		Lipid	Lysolipid	100001571		5874	500.278
	1532			1-palmitoyl-GPI (16:0)*	LC/MS neg	35305		HMDB61695						0.3	0.56	0.94	1.73		1.2868e-07	7.3785e-07	0.0474	0.0533	0.0202	0.0325	2.8917e-07	4.5623e-06	0.0033	0.006	0.7857	0.3515	0.0033	0.0218		1.5577	1.4606	0.4713	0.8166		100	100	100	100		Lipid	Lysolipid	100001655		5564	571.289
	1535			1-stearoyl-GPI (18:0)	LC/MS neg	19324		HMDB61696						0.54	0.76	0.94	1.32		0.0011	0.0012	0.4701	0.2865	0.2058	0.1446	0.0016	0.0032	0.1092	0.0885	0.6935	0.3212	0.1627	0.2246		1.3064	1.2284	0.7086	0.9361		100	100	100	100		Lipid	Lysolipid	100000656	796963-93-4	5794.3	599.32
	1537			1-oleoyl-GPI (18:1)*	LC/MS neg	36602								0.19	0.44	0.89	2.08		2.7463e-08	2.2189e-07	0.0589	0.064	0.0273	0.0398	1.2148e-07	2.3958e-06	0.0009	0.0022	0.8015	0.3558	0.0051	0.0278		1.5971	1.4266	0.3037	0.633		100	100	38	100		Lipid	Lysolipid	100001777		5599	597.305
	1539			1-linoleoyl-GPI (18:2)*	LC/MS neg	36594								0.24	0.27	1.19	1.35		2.092e-12	1.8589e-10	0.0615	0.066	0.4363	0.229	1.1204e-09	3.7878e-08	1.6755e-08	6.6776e-07	0.4198	0.2296	0.063	0.1303		1.7797	2.1244	0.431	0.582		100	100	100	100		Lipid	Lysolipid	100001778		5494	595.289
	1543			1-arachidonoyl-GPI (20:4)*	LC/MS neg	34214		HMDB61690						0.58	0.56	1.11	1.08		0.0017	0.0017	0.9283	0.4361	0.8632	0.3447	0.0157	0.0192	0.0275	0.0307	0.9535	0.3934	0.8529	0.6035		1.3654	1.5139	0.7931	0.8531		100	100	100	100		Lipid	Lysolipid	100001654		5482	619.289
	1548			1-linoleoylglycerophosphoserine*	LC/MS neg	43676								0.47	0.42	1.73	1.53		0.0001	0.0002	0.0389	0.046	0.4652	0.2359	0.0122	0.016	0.0009	0.0022	0.0492	0.046	0.3217	0.3515		0.8199	1.4189	0.3871	0.5934		100	100	25	63		Lipid	Lysolipid	100004606		5500	520.268
	1551			1-palmitoyl-GPA (16:0)	LC/MS neg	34428	C04036	HMDB00327	6419701					0.73	0.89	0.58	0.7		0.1713	0.0734	0.0676	0.0711	0.3316	0.191	0.1018	0.0798	0.7708	0.4241	0.0506	0.0471	0.5238	0.463		1.4149	0.814	1.026	0.7212		100	88	75	88		Lipid	Lysolipid	100001445	17618-08-5	5600	409.236
	1554			1-arachidonoyl-GPA (20:4)	LC/MS neg	46325								0.64	0.49	1.41	1.1		0.0022	0.002	0.4477	0.2785	0.6973	0.2994	0.0443	0.0428	0.0127	0.0164	0.4178	0.2296	0.7917	0.575		1.296	1.8337	0.8233	0.9052		100	100	100	100		Lipid	Lysolipid	100004442	799268-65-8	5499	457.236
	1556			1-palmitoyl-GPG (16:0)*	LC/MS neg	45970			3300276					0.39	0.68	0.7	1.24		0.0027	0.0024	0.324	0.2198	0.0579	0.0623	0.0009	0.002	0.3626	0.2339	0.0441	0.0417	0.4969	0.4477		1.0347	0.7229	0.3993	0.4947		88	38	13	38		Lipid	Lysolipid	100005717		5570	483.273
	1561			1-oleoyl-GPG (18:1)*	LC/MS neg	45968								0.29	0.5	0.89	1.57		0.0018	0.0017	0.9373	0.4368	0.1895	0.1386	0.0021	0.0038	0.1486	0.114	0.3226	0.1942	0.3786	0.3888		1.0196	0.9098	0.2906	0.4548		75	50	13	38		Lipid	Lysolipid	100005716		5610	509.288
	1567			palmitoyl-oleoyl-glycerophosphoglycerol (2)	LC/MS polar	48391								0.88	0.75	1.48	1.26		0.0003	0.0004	1.5334e-06	1.0837e-05	0.1341	0.1123	0.0767	0.0626	0.0004	0.0012	9.8217e-06	4.1499e-05	0.0034	0.022		0.9317	1.3832	0.8212	1.0307		100	100	100	100		Lipid	Lysolipid	100006159		745	747.519
	1575		Phosphatidylcholine (PC)	palmitoyl-arachidonoyl-glycerophosphocholine (1)*	LC/MS polar	48383								1.17	1.05	1.12	1.01		0.0206	0.013	0.1842	0.1455	0.1999	0.1415	0.0127	0.0163	0.4261	0.2665	0.069	0.0596	0.9727	0.6357		0.8942	1.002	1.0488	1.056		100	100	100	100		Lipid	Phosphatidylcholine (PC)	100006132		870	826.56
	1576			palmitoyl-arachidonoyl-glycerophosphocholine (2)*	LC/MS polar	48392								1.19	1.17	1.03	1.01		9.681e-06	2.4583e-05	0.5591	0.3189	0.7737	0.3205	0.0004	0.001	0.0012	0.0028	0.5381	0.2748	0.833	0.5977		0.9099	0.9348	1.0865	1.0977		100	100	100	100		Lipid	Phosphatidylcholine (PC)	100006157		790	826.56
	1577			palmitoyl-linoleoyl-glycerophosphocholine (1)*	LC/MS polar	48385								0.85	0.84	1.03	1.01		0.0002	0.0003	0.6489	0.3505	0.8309	0.335	0.0081	0.0116	0.0038	0.0066	0.6365	0.3057	0.8639	0.6035		1.0318	1.0657	0.8802	0.892		100	100	100	100		Lipid	Phosphatidylcholine (PC)	100006133		870	802.56
	1578			palmitoyl-linoleoyl-glycerophosphocholine (2)*	LC/MS polar	48269								0.85	0.88	0.98	1.01		0.0001	0.0002	0.8487	0.4129	0.6055	0.2769	0.0014	0.0029	0.0092	0.013	0.6171	0.2996	0.8173	0.5911		1.0949	1.0696	0.9278	0.9382		100	100	100	100		Lipid	Phosphatidylcholine (PC)	100006134		783	802.56
	1579			palmitoyl-oleoyl-glycerophosphocholine (1)*	LC/MS polar	48267								0.74	0.89	0.81	0.97		4.1141e-05	8.2167e-05	0.0114	0.0172	0.0578	0.0623	4.3875e-05	0.0002	0.0514	0.049	0.0025	0.0042	0.6094	0.5083		1.2741	1.0366	0.9485	0.9219		100	100	100	100		Lipid	Phosphatidylcholine (PC)	100006142		853	804.576
	1580			stearoyl-arachidonoyl-glycerophosphocholine (1)*	LC/MS polar	48386								1.6	1.03	1.66	1.08		0.0098	0.0069	0.0104	0.0163	0.0298	0.0424	0.0013	0.0026	0.7368	0.4103	0.0013	0.0025	0.7489	0.5576		0.6915	1.1507	1.1062	1.1892		100	100	100	100		Lipid	Phosphatidylcholine (PC)	100006135		869	854.591
	1581			stearoyl-arachidonoyl-glycerophosphocholine (2)*	LC/MS polar	48393								1.57	1.21	1.38	1.06		2.4026e-05	5.0242e-05	0.0105	0.0163	0.0579	0.0623	3.0036e-05	0.0001	0.0383	0.0391	0.0024	0.004	0.5923	0.4998		0.6895	0.95	1.0825	1.1472		100	100	100	100		Lipid	Phosphatidylcholine (PC)	100006158		790	854.591
	1582			oleoyl-linoleoyl-glycerophosphocholine (1)	LC/MS polar	48270								0.89	0.93	1.12	1.16		0.0149	0.0099	0.0007	0.0019	0.5997	0.2754	0.0354	0.0361	0.1555	0.1182	0.0288	0.0298	0.0049	0.0278		0.9816	1.0983	0.8735	1.0176		100	100	100	100		Lipid	Phosphatidylcholine (PC)	100006165		777	828.576
	1583			oleoyl-linoleoyl-glycerophosphocholine (2)	LC/MS polar	48390								0.89	0.83	1.21	1.13		0.0077	0.0056	0.0095	0.0154	0.4442	0.2324	0.1491	0.1084	0.0154	0.0189	0.0178	0.0205	0.1663	0.2273		0.9795	1.1853	0.8726	0.9818		100	100	100	100		Lipid	Phosphatidylcholine (PC)	100006166		860	828.576
	1584			palmitoyl-palmitoyl-glycerophosphocholine (1)*	LC/MS polar	48276								1.01	0.93	1.08	1		0.4658	0.1732	0.4689	0.2865	0.3342	0.1915	0.8647	0.3854	0.2335	0.162	0.2349	0.1527	0.8618	0.6035		0.9989	1.0784	1.0044	1.0021		100	100	100	100		Lipid	Phosphatidylcholine (PC)	100006160		854	778.56
	1585			palmitoyl-palmitoyl-glycerophosphocholine (2)*	LC/MS polar	48389								1.14	1.02	1.15	1.03		0.0691	0.0347	0.0546	0.0604	0.1972	0.1414	0.0311	0.0324	0.6903	0.3914	0.0259	0.0274	0.632	0.5234		0.8884	1.0242	1.0143	1.0418		100	100	100	100		Lipid	Phosphatidylcholine (PC)	100006161		790	778.56
	1586			stearoyl-linoleoyl-glycerophosphocholine (1)*	LC/MS polar	48387								0.78	0.73	1.26	1.19		5.6801e-08	3.8833e-07	1.5659e-05	7.6612e-05	0.4069	0.2178	8.6915e-05	0.0003	3.3797e-06	3.3674e-05	0.0002	0.0006	0.0045	0.0262		1.0368	1.309	0.8039	0.9546		100	100	100	100		Lipid	Phosphatidylcholine (PC)	100006154		792	830.592
	1587			stearoyl-linoleoyl-glycerophosphocholine (2)*	LC/MS polar	48388								0.76	0.66	1.37	1.19		8.0449e-07	3.4878e-06	0.0002	0.0008	0.2401	0.1592	0.0012	0.0024	1.1941e-05	7.7848e-05	0.0006	0.0014	0.0409	0.1007		1.0507	1.4355	0.7938	0.9476		100	100	100	100		Lipid	Phosphatidylcholine (PC)	100006155		867	830.591
	1588		Phosphatidylethanolamine (PE)	stearoyl-arachidonoyl-glycerophosphoethanolamine (1)*	LC/MS polar	48497								1.52	1.39	0.97	0.89		1.4415e-07	8.0074e-07	0.1822	0.1454	0.4779	0.2393	8.5651e-06	5.9618e-05	0.0001	0.0005	0.65	0.3089	0.1511	0.2156		0.8955	0.8674	1.3647	1.2097		100	100	100	100		Lipid	Phosphatidylethanolamine (PE)	100006316		750	766.539
	1589			stearoyl-linoleoyl-glycerophosphoethanolamine (1)*	LC/MS polar	48499								0.76	0.71	1.1	1.02		0.0016	0.0015	0.6013	0.3364	0.7874	0.3242	0.03	0.0314	0.0125	0.0163	0.5757	0.2865	0.8575	0.6035		1.1543	1.274	0.8789	0.8982		100	100	100	100		Lipid	Phosphatidylethanolamine (PE)	100006320		750	742.539
	1590		Phosphatidylinositol (PI)	oleoyl-linoleoyl-glycerophosphoinositol (1)	LC/MS polar	48303								0.67	0.79	1	1.18		7.7943e-08	5.1313e-07	0.0867	0.0849	0.1066	0.095	8.8998e-07	1.1085e-05	0.0005	0.0015	0.9398	0.3892	0.0215	0.0719		1.1399	1.1402	0.7636	0.898		100	100	100	100		Lipid	Phosphatidylinositol (PI)	100006140		902	859.534
	1591			palmitoyl-linoleoyl-glycerophosphoinositol (1)*	LC/MS polar	48304								0.55	0.59	1.19	1.27		6.933e-12	3.4316e-10	0.0003	0.001	0.4572	0.2357	3.2265e-09	8.4843e-08	4.523e-08	1.2618e-06	0.0255	0.0271	0.0019	0.0146		1.1864	1.4105	0.6572	0.8339		100	100	100	100		Lipid	Phosphatidylinositol (PI)	100006138		910	833.518
	1592			stearoyl-arachidonoyl-glycerophosphoinositol (1)*	LC/MS polar	48282								1.29	1.13	1.14	1		0.0023	0.0021	0.2661	0.1886	0.2195	0.1516	0.0029	0.0051	0.1487	0.114	0.1021	0.0823	0.9323	0.6218		0.8374	0.9588	1.0825	1.082		100	100	100	100		Lipid	Phosphatidylinositol (PI)	100006136		897	885.549
	1593			stearoyl-arachidonoyl-glycerophosphoinositol (2)	LC/MS polar	48847								1.22	2.1	0.72	1.25		0.0197	0.0126	0.9291	0.4361	0.2456	0.1609	0.3702	0.2168	0.0151	0.0187	0.3748	0.2161	0.4448	0.4219		0.9098	0.6555	1.1062	1.3795		100	88	100	100		Lipid	Phosphatidylinositol (PI)	100006156		850	885.549
	1594		Glycerolipid Metabolism	glycerol	LC/MS neg	15122	C00116	HMDB00131	753					1.01	0.64	1.15	0.73		0.004	0.0032	0.3874	0.2508	0.009	0.0179	0.8158	0.3756	0.0002	0.0008	0.1834	0.1288	0.0145	0.0593		1.0263	1.183	1.0405	0.7618		100	100	100	100		Lipid	Glycerolipid Metabolism	1254	56-81-5	758	91.0401
	1595			glycerol 3-phosphate	LC/MS polar	43847	C00093	HMDB00126	754					0.63	0.68	1.04	1.12		1.2947e-05	3.11e-05	0.483	0.2892	0.6668	0.2929	0.0004	0.001	0.0019	0.004	0.8468	0.3673	0.4246	0.4147		1.2016	1.2471	0.76	0.8485		100	100	100	100		Lipid	Glycerolipid Metabolism	100000258	29849-82-9	3938.7	171.006
	1600			glycerophosphoglycerol	LC/MS polar	48857	C03274		439964					0.43	0.65	0.67	1		2.1018e-07	1.0378e-06	0.0452	0.0522	0.0636	0.067	1.1138e-06	1.318e-05	0.0018	0.0038	0.0081	0.0112	0.9078	0.6184		1.8287	1.2283	0.7912	0.7942		100	100	100	100		Lipid	Glycerolipid Metabolism	100001619		2430	245.043
	1604		Monoacylglycerol	1-pentadecanoylglycerol (15:0)	LC/MS neg	47898			190750					0.55	0.42	1.25	0.97		1.8852e-05	4.1369e-05	0.7331	0.3745	0.3472	0.1957	0.0062	0.0095	0.0002	0.0006	0.3656	0.2128	0.6687	0.5346		1.3039	1.6311	0.7151	0.6923		100	100	88	100		Lipid	Monoacylglycerol	100001431		6200	241.217
	1605			1-palmitoylglycerol (16:0)	LC/MS neg	21127		HMDB31074	14900					0.59	0.31	2.02	1.06		2.2807e-08	2.0068e-07	0.001	0.0025	0.0034	0.0092	0.0037	0.0063	2.1966e-08	7.6599e-07	4.0599e-05	0.0001	0.7434	0.5567		1.3262	2.685	0.7837	0.8293		100	100	100	100		Lipid	Monoacylglycerol	100000827	542-44-9	6400	255.233
	1606			2-palmitoylglycerol (16:0)	LC/MS neg	33419		HMDB11533	123409					0.79	0.3	2.49	0.96		1.8707e-06	7.078e-06	0.0004	0.0011	8.3248e-05	0.0009	0.3327	0.1988	3.7218e-08	1.1537e-06	1.3365e-06	8.0248e-06	0.703	0.5434		1.1495	2.8589	0.9057	0.866		100	100	100	100		Lipid	Monoacylglycerol	100001048	23470-00-0	6628.9	255.233
	1608			1-stearoylglycerol (18:0)	GC/MS	21188	D01947	HMDB31075	24699					0.83	0.79	1.17	1.12		0.104	0.0488	0.3804	0.2475	0.9239	0.3574	0.2722	0.1713	0.2194	0.1546	0.4907	0.2556	0.5785	0.4916		1.1165	1.3105	0.9217	1.031		100	100	100	100		Lipid	Monoacylglycerol	100000932	123-94-4;31566-31-1	2186.6	399.4
	1610			1-oleoylglycerol (18:1)	LC/MS neg	21184		HMDB11567	5283468					0.46	0.42	1.13	1.02		1.1915e-07	7.0594e-07	0.6851	0.3624	0.6045	0.2769	8.201e-05	0.0003	1.0836e-05	7.3734e-05	0.5146	0.2638	0.9363	0.6233		1.4269	1.6078	0.6522	0.6684		100	100	100	100		Lipid	Monoacylglycerol	100000924	111-03-5	6794	281.249
	1611			2-oleoylglycerol (18:1)	LC/MS neg	21232			5319879					0.56	0.36	1.57	0.99		1.9637e-07	9.9729e-07	0.1108	0.101	0.0413	0.0511	0.0025	0.0044	7.1715e-07	1.0003e-05	0.0123	0.0151	0.7304	0.5536		1.2571	1.975	0.707	0.7017		100	100	100	100		Lipid	Monoacylglycerol	100000943	3443-84-3	6950	281.249
	1612			1-linoleoylglycerol (18:2)	LC/MS neg	27447			5283469					0.81	0.37	1.85	0.85		0.0001	0.0002	0.1196	0.1056	0.0016	0.006	0.4712	0.2527	4.6051e-06	4.2824e-05	0.0012	0.0024	0.1947	0.2491		1.1382	2.1035	0.9177	0.7771		100	100	100	100		Lipid	Monoacylglycerol	100001040	2277-28-3	6477	279.233
	1613			2-linoleoylglycerol (18:2)	LC/MS neg	32506		HMDB11538	5365676					0.65	0.37	1.48	0.83		4.5082e-06	1.272e-05	0.4861	0.2903	0.0123	0.0224	0.0435	0.0423	2.4048e-06	2.6836e-05	0.0238	0.0255	0.1746	0.2343		1.3649	2.0249	0.8927	0.7428		100	100	100	100		Lipid	Monoacylglycerol	100000987	3443-82-1	6250	279.233
	1614			1-linolenoylglycerol (18:3)	LC/MS neg	34393		HMDB11569	53480978					0.43	0.31	1.09	0.79		5.8845e-09	6.9731e-08	0.5102	0.2983	0.1049	0.0945	7.5373e-05	0.0003	1.2865e-07	2.9909e-06	0.4816	0.2538	0.1087	0.1777		1.6159	1.7535	0.6963	0.5479		100	100	100	100		Lipid	Monoacylglycerol	100001435		6214	277.217
	1615			1-arachidonylglycerol (20:4)	LC/MS neg	34397	C13857	HMDB11572	5282281					1.42	0.49	3.05	1.05		0.2277	0.0937	0.0001	0.0004	9.8114e-05	0.0009	0.0269	0.0288	0.0003	0.0011	6.5888e-07	4.6979e-06	0.9724	0.6357		0.6998	2.1365	0.9926	1.0393		100	100	100	100		Lipid	Monoacylglycerol	100001433	35474-99-8	6450	303.233
	1616			2-arachidonoylglycerol (20:4)	LC/MS neg	19266	C13856	HMDB04666	5282280					0.98	0.65	1.98	1.31		0.1288	0.0578	0.0004	0.0012	0.0688	0.0712	0.8185	0.3761	0.021	0.0251	0.0003	0.0007	0.1485	0.2135		0.8646	1.7078	0.8492	1.1131		100	100	100	100		Lipid	Monoacylglycerol	100000584	53847-30-6	6170	303.233
	1620			1-docosahexaenoylglycerol (22:6)	LC/MS neg	35153		HMDB11587						0.77	0.48	1.56	0.97		0.0002	0.0003	0.077	0.0779	0.0226	0.0356	0.2025	0.1354	6.0021e-05	0.0003	0.0056	0.008	0.6862	0.5374		1.1022	1.7209	0.8532	0.8253		100	100	100	100		Lipid	Monoacylglycerol	100001481		6150	309.222
	1622			1-dihomo-linolenylglycerol (alpha, gamma)	LC/MS neg	48341								0.81	0.39	1.93	0.92		1.4476e-05	3.4309e-05	0.0135	0.0193	0.0006	0.0034	0.331	0.1983	5.986e-07	9.8232e-06	8.7421e-05	0.0003	0.4031	0.4025		1.0964	2.1125	0.8878	0.8205		100	100	100	100		Lipid	Monoacylglycerol	100006121		6220	305.249
	1624			2-docosahexaenoylglcyerol*	LC/MS neg	48675		HMDB11557						1.07	0.5	2.07	0.97		0.0362	0.0209	0.0113	0.0172	0.0034	0.0092	0.4851	0.258	0.0007	0.0018	0.0003	0.0007	0.7315	0.5536		0.9129	1.894	0.9747	0.9429		100	100	100	100		Lipid	Monoacylglycerol	100006352		6000	309.222
	1630		Diacylglycerol	1,2-dipalmitoylglycerol	GC/MS	11953		HMDB07098	99931					0.65	1.54	0.41	0.96		0.6986	0.2421	0.0958	0.0909	0.4697	0.2375	0.4334	0.2408	0.8108	0.4401	0.0934	0.0767	0.4894	0.4431		1.5225	0.6204	0.9961	0.9526		75	75	75	50		Lipid	Diacylglycerol	850	40290-32-2	2600	145
	1637		Sphingolipid Metabolism	palmitoyl sphingomyelin (d18:1/16:0)	LC/MS polar	37506			9939941					1.18	0.94	1.4	1.11		0.1113	0.0519	1.3858e-07	1.6026e-06	0.001	0.0049	0.0008	0.0019	0.164	0.123	3.3944e-08	4.0763e-07	0.0266	0.0804		0.814	1.1389	0.9622	1.0702		100	100	100	100		Lipid	Sphingolipid Metabolism	100002107	6254-89-3	870	747.566
	1638			stearoyl sphingomyelin (d18:1/18:0)	LC/MS polar	19503	C00550	HMDB01348	6453725					1.5	1.27	1.66	1.4		0.0021	0.002	0.0001	0.0004	0.5685	0.2676	0.0092	0.0127	0.0571	0.0533	0.0013	0.0025	0.0104	0.0452		0.5861	0.9749	0.8778	1.2333		75	88	88	100		Lipid	Sphingolipid Metabolism	1538	85187-10-6;85187-10-6	979	775.597
	1639			sphingomyelin (d18:1/18:1, d18:2/18:0)	LC/MS polar	37529			6443882					1.6	1.4	1.3	1.13		1.6235e-05	3.6073e-05	0.0227	0.0299	0.5667	0.2676	0.0003	0.0009	0.0029	0.0055	0.0435	0.0414	0.2059	0.2569		0.6057	0.788	0.9691	1.0994		25	75	88	100		Lipid	Sphingolipid Metabolism	100002106	108392-10-5	865	773.581
	1642			sphingosine 1-phosphate	LC/MS polar	34445	C06124	HMDB00277	5283560					0.9	0.72	1.25	1		0.0058	0.0044	0.1204	0.106	0.2472	0.1609	0.2122	0.141	0.0064	0.0095	0.059	0.0524	0.7687	0.5618		0.9638	1.2072	0.8713	0.8723		100	100	100	100		Lipid	Sphingolipid Metabolism	100000626	26993-30-6	1850	378.241
	1651			N-palmitoyl-sphingosine	LC/MS polar	48278		HMDB04949	5283564					0.7	0.56	1.42	1.13		0.0007	0.0008	0.0637	0.0678	0.2814	0.174	0.0659	0.0571	0.0017	0.0037	0.0411	0.0398	0.561	0.4824		0.8081	1.1437	0.5681	0.6398		63	88	13	50		Lipid	Sphingolipid Metabolism	1518	24696-26-2	703	582.51
	1653			sphingomyelin (d18:1/14:0, d16:1/16:0)*	LC/MS polar	42463			11433862					0.82	0.52	1.51	0.95		2.1182e-06	7.3297e-06	0.0065	0.0114	0.0013	0.0053	0.1043	0.0812	2.633e-07	5.2468e-06	8.18e-05	0.0003	0.6589	0.5305		0.8059	1.2132	0.6603	0.6295		50	100	25	13		Lipid	Sphingolipid Metabolism	100004328		873	719.534
	1655			sphingomyelin (d18:1/24:1, d18:2/24:0)*	LC/MS polar	47153								1.81	1.37	1.09	0.83		1.0813e-10	2.7456e-09	0.2245	0.1662	0.0071	0.0154	7.6124e-10	3.0026e-08	2.9289e-05	0.0002	0.2497	0.1604	0.0066	0.0318		0.7535	0.8225	1.3644	1.126		100	100	100	100		Lipid	Sphingolipid Metabolism	100005986	94359-13-4	850	857.675
	1656			sphingomyelin (d18:2/16:0, d18:1/16:1)*	LC/MS polar	42459								1.26	1	1.22	0.97		0.0025	0.0023	0.0191	0.0262	0.0042	0.0107	9.4839e-05	0.0003	0.8903	0.4687	0.0005	0.0011	0.6583	0.5305		0.8332	1.0178	1.0474	1.0208		100	100	100	100		Lipid	Sphingolipid Metabolism	100004329		866	745.55
	1659			sphingomyelin (d18:1/22:1, d18:2/22:0, d16:1/24:1)*	LC/MS polar	48493								1.62	1.58	1.01	0.99		5.3146e-07	2.4222e-06	0.8024	0.3964	0.9205	0.3568	0.0001	0.0004	7.3937e-05	0.0003	0.8045	0.3558	0.9152	0.6184		0.7385	0.745	1.1955	1.1779		100	88	100	100		Lipid	Sphingolipid Metabolism	100006295		910	829.644
	1663		Mevalonate Metabolism	3-hydroxy-3-methylglutarate	LC/MS polar	531	C03761	HMDB00355	1662					0.95	0.71	1.08	0.81		0.0338	0.0197	0.3098	0.2124	0.0714	0.0734	0.8019	0.3714	0.0071	0.0104	0.5575	0.2812	0.0492	0.1125		1.1559	1.248	1.0953	0.8831		100	100	100	100		Lipid	Mevalonate Metabolism	112	503-49-1	2700	161.046
	1664			mevalonate	LC/MS polar	39583	C02104	HMDB00227	439230					0.78	0.73	1.09	1.02		0.0065	0.0048	0.7275	0.3728	0.7467	0.3117	0.0749	0.0615	0.0284	0.0314	0.6352	0.3057	0.9856	0.6381		1.1299	1.2309	0.8835	0.9046		100	100	100	100		Lipid	Mevalonate Metabolism	30	96949-03-0	1462	147.066
	1675		Sterol	cholesterol	GC/MS	63	C00187	HMDB00067	11025495					0.82	0.94	1	1.15		0.0089	0.0064	0.158	0.1311	0.1937	0.1403	0.0067	0.01	0.3048	0.202	0.9336	0.3879	0.0591	0.125		1.1014	1.1059	0.9075	1.0399		100	100	100	100		Lipid	Sterol	266	57-88-5	2316.9	329.3
	1685			7-alpha-hydroxy-3-oxo-4-cholestenoate (7-Hoca)	LC/MS neg	36776	C17337	HMDB12458	3081085					2.16	0.72	2.43	0.81		0.0504	0.0266	0.0126	0.0187	1.0311e-05	0.0002	1.4485e-05	8.1809e-05	0.0263	0.0295	4.3884e-06	2.2756e-05	0.0668	0.1349		0.5468	1.3262	1.1805	0.9572		100	100	100	100		Lipid	Sterol	100001609	115538-85-7	5288.1	429.301
	1688			cholestanol	GC/MS	21131	C12978	HMDB00908	6665					0.88	0.85	0.97	0.94		0.1231	0.0563	0.6348	0.3451	0.7419	0.311	0.3816	0.2208	0.1849	0.1347	0.9176	0.3846	0.57	0.4867		1.1074	1.0782	0.9793	0.9174		100	100	100	100		Lipid	Sterol	100000859	80-97-7	2320.8	215.2
	1696			beta-sitosterol	GC/MS	27414	C01753	HMDB00852	222284					0.54	0.83	0.57	0.89		0.0004	0.0005	0.0043	0.0086	0.0301	0.0426	0.0001	0.0004	0.2184	0.1543	0.0007	0.0015	0.5675	0.4866		1.5145	0.8686	0.8139	0.7234		100	100	63	63		Lipid	Sterol	100001033	83-46-5	2380.8	357.4
	1698			campesterol	GC/MS	33997	C01789	HMDB02869	173183					0.75	0.63	0.82	0.69		0.0006	0.0007	0.004	0.0083	0.2517	0.1628	0.0679	0.0581	0.0014	0.0031	0.1765	0.1247	0.0051	0.0278		1.3433	1.0984	1.005	0.6949		100	100	100	100		Lipid	Sterol	100001269	474-62-4	2353	129
	1758		Steroid	corticosterone	LC/MS pos	5983	C02140	HMDB01547	5753					3.05	0.78	2.97	0.76		0.0045	0.0036	0.0246	0.0323	0.0002	0.0012	1.4009e-05	8.1809e-05	0.3829	0.2444	5.5233e-05	0.0002	0.1759	0.2351		0.4325	1.2852	1.3173	1.0007		100	100	100	100		Lipid	Steroid	272	50-22-6	4851.2	347.222
	1759			11-dehydrocorticosterone	LC/MS pos	39779								3.36	1.17	1.72	0.6		0.0144	0.0096	0.7922	0.3921	0.1543	0.1237	0.0075	0.0111	0.4248	0.2663	0.404	0.2248	0.2313	0.2781		0.4861	0.8346	1.633	0.9802		63	63	88	100		Lipid	Steroid	100002781	72-23-1	4533.8	345.206
	1840		Primary Bile Acid Metabolism	cholate	LC/MS neg	22842	C00695	HMDB00619	221493					0.1	5.29	0.03	1.85		0.4346	0.163	0.0056	0.0102	0.0002	0.0012	0.0011	0.0024	0.0184	0.0222	1.6666e-05	6.5561e-05	0.3538	0.3741		9.6153	0.3306	0.9479	1.7504		100	100	88	100		Lipid	Primary Bile Acid Metabolism	136	81-25-4	5165	407.28
	1841			glycocholate	LC/MS neg	18476	C01921	HMDB00138	10140					0.79	5.7	0.68	4.92		0.033	0.0194	0.1004	0.0942	0.003	0.0086	0.4793	0.2561	0.0006	0.0016	0.2802	0.1737	0.0016	0.0144		0.8337	0.5694	0.6597	3.2483		75	0	25	88		Lipid	Primary Bile Acid Metabolism	342	475-31-0;863-57-0	5163	464.302
	1842			taurocholate	LC/MS neg	18497	C05122	HMDB00036	6675					0.77	11.43	2.31	34.14		0.0304	0.0179	0.0001	0.0004	0.0261	0.039	0.9619	0.4109	0.0028	0.0055	0.1478	0.1106	4.6608e-05	0.0012		0.9413	2.1708	0.727	24.8217		100	100	100	100		Lipid	Primary Bile Acid Metabolism	1648	145-42-6	5150	514.284
	1843			chenodeoxycholate	LC/MS neg	1563	C02528	HMDB00518	10133					0.73	1.66	0.99	2.27		0.7705	0.2607	0.0464	0.0529	0.1746	0.1319	0.4438	0.2448	0.2427	0.1664	0.6287	0.3039	0.0204	0.0708		1.0019	0.9944	0.7274	1.6528		88	100	88	88		Lipid	Primary Bile Acid Metabolism	1123	474-24-9;474-25-9	5264	391.285
	1845			taurochenodeoxycholate	LC/MS neg	18494	C05465	HMDB00951	387316					1.24	10.99	5.18	45.98		0.121	0.0556	3.6768e-05	0.0002	0.3568	0.1985	0.6433	0.3178	0.0837	0.0704	0.0092	0.0122	0.0003	0.0051		0.5615	2.9071	0.6948	31.9474		100	100	100	100		Lipid	Primary Bile Acid Metabolism	1629	6009-98-9	5250	498.289
	1846			beta-muricholate	LC/MS neg	31885	C17726	HMDB00415	5283853					0.26	19.05	0.08	5.97		0.0039	0.0032	0.458	0.2835	2.3987e-06	5.6191e-05	0.0615	0.0541	6.3606e-07	9.8581e-06	6.2329e-05	0.0002	0.0011	0.0113		3.1731	0.2574	0.821	4.9044		100	100	100	100		Lipid	Primary Bile Acid Metabolism	100001066	2393-59-1	4794	407.28
	1849			tauro-beta-muricholate	LC/MS neg	33983		HMDB00932	168408					0.54	22.72	3.58	150.95		0.0605	0.0311	1.118e-06	8.1266e-06	0.0055	0.0128	0.4615	0.2511	0.0015	0.0033	0.033	0.0335	4.7894e-07	3.4433e-05		0.9037	3.2348	0.4869	73.4997		100	100	100	100		Lipid	Primary Bile Acid Metabolism	100001250	25696-60-0	4774	514.284
	1851		Secondary Bile Acid Metabolism	deoxycholate	LC/MS neg	1114	C04483	HMDB00626	222528					1.12	10.91	0.07	0.66		0.0419	0.0234	1.5391e-05	7.6612e-05	0.1038	0.094	0.7524	0.3554	0.0117	0.0156	3.885e-05	0.0001	0.0186	0.0682		2.214	0.1492	2.4706	1.6276		100	100	100	88		Lipid	Secondary Bile Acid Metabolism	302	83-44-3	5294	391.285
	1853			taurodeoxycholate	LC/MS neg	12261	C05463	HMDB00896	2733768					2.44	17.12	1.06	7.42		0.0027	0.0024	0.2564	0.1833	0.3401	0.193	0.1113	0.0842	0.0054	0.0085	0.8952	0.379	0.1434	0.21		0.7136	0.7565	1.7444	12.9519		100	100	100	100		Lipid	Secondary Bile Acid Metabolism	1668	207737-97-1	5257.4	498.289
	1862			ursodeoxycholate	LC/MS neg	1605	C07880	HMDB00946	31401					0.09	4.53	0.05	2.45		0.1423	0.0628	0.007	0.012	1.1496e-05	0.0002	4.4022e-05	0.0002	0.0117	0.0156	2.9476e-06	1.564e-05	0.0995	0.1694		2.7715	0.136	0.2513	0.6157		88	0	38	75		Lipid	Secondary Bile Acid Metabolism	1135	128-13-2	5055	391.285
	1864			tauroursodeoxycholate	LC/MS neg	39378		HMDB00874	9848818					0.62	36.5	2.37	138.75		0.0489	0.0263	1.1047e-05	5.7357e-05	0.0058	0.0132	0.5165	0.271	0.0013	0.003	0.108	0.0862	2.4812e-06	0.0001		0.8768	2.0738	0.5455	75.6893		100	100	100	100		Lipid	Secondary Bile Acid Metabolism	100002912	14605-22-2	5025	498.289
	1873			hyodeoxycholate	LC/MS neg	27531	C15517	HMDB00733	5283820					0.63	1.62	0.18	0.46		0.7871	0.265	0.0005	0.0014	0.185	0.1364	0.4489	0.2465	0.2584	0.1758	0.0008	0.0017	0.0791	0.1481		2.0893	0.3743	1.3191	0.6073		75	0	88	50		Lipid	Secondary Bile Acid Metabolism	100000777	83-49-8	5097	391.285
	1874			taurohyodeoxycholic acid	LC/MS neg	43588			119046					1.57	22.74	0.64	9.25		0.0018	0.0017	0.4707	0.2865	0.019	0.0312	0.5011	0.2653	0.0002	0.0008	0.2239	0.1476	0.0306	0.0865		0.8953	0.5708	1.4035	12.9775		100	100	100	100		Lipid	Secondary Bile Acid Metabolism	100003869	38411-85-7	5073	498.289
	2429	Nucleotide	Purine Metabolism, (Hypo)Xanthine/Inosine containing	inosine	LC/MS neg	1123	C00294	HMDB00195	6021					1.72	1.35	1.35	1.06		0.3098	0.1226	0.2304	0.1685	0.4776	0.2393	0.8256	0.3772	0.2251	0.1574	0.7231	0.3293	0.1798	0.2385		0.6866	0.9302	1.1808	1.2529		100	100	100	100		Nucleotide	Purine Metabolism, (Hypo)Xanthine/Inosine containing	361	58-63-9	1602.1	267.073
	2430			hypoxanthine	LC/MS neg	3127	C00262	HMDB00157	790					5.21	1.02	3.07	0.6		0.0874	0.0425	0.2128	0.1621	0.1697	0.1301	0.0326	0.0336	0.8001	0.4351	0.068	0.059	0.9249	0.6203		0.6719	2.065	3.5024	2.0962		88	100	100	100		Nucleotide	Purine Metabolism, (Hypo)Xanthine/Inosine containing	171	68-94-0	1291.2	135.031
	2431			xanthine	LC/MS neg	3147	C00385	HMDB00292	1188					2.48	0.79	2.13	0.68		0.2134	0.0886	0.2434	0.1754	0.0757	0.0767	0.0359	0.0364	0.6893	0.3914	0.0406	0.0398	0.6479	0.5305		0.717	1.5296	1.7784	1.2091		100	100	100	100		Nucleotide	Purine Metabolism, (Hypo)Xanthine/Inosine containing	1004	69-89-6	908.9	151.026
	2433			xanthosine	LC/MS pos	15136	C01762	HMDB00299	64959					0.9	0.68	0.85	0.65		0.0503	0.0266	0.0713	0.074	0.1849	0.1364	0.6313	0.3139	0.0229	0.0265	0.7183	0.3282	0.03	0.0861		1.2822	1.0958	1.151	0.7504		100	100	100	100		Nucleotide	Purine Metabolism, (Hypo)Xanthine/Inosine containing	100000299	146-80-5	1827	285.083
	2438			urate	LC/MS neg	1604	C00366	HMDB00289	1175					1.07	0.77	0.98	0.7		0.4138	0.1565	0.0414	0.0483	0.1679	0.1296	0.6817	0.3319	0.1236	0.0971	0.6136	0.2985	0.018	0.0678		1.0013	0.9794	1.0717	0.7531		100	100	100	100		Nucleotide	Purine Metabolism, (Hypo)Xanthine/Inosine containing	1134	69-93-2;120K5305	757.1	167.021
	2439			allantoin	LC/MS polar	1107	C02350	HMDB00462	204					0.75	0.96	0.79	1.02		0.04	0.0227	0.1434	0.122	0.1014	0.0922	0.0111	0.0149	0.7474	0.4145	0.0316	0.0322	0.8951	0.6143		1.2521	0.9914	0.9407	0.955		100	100	100	100		Nucleotide	Purine Metabolism, (Hypo)Xanthine/Inosine containing	1002	97-59-6	1672	157.037
	2440			allantoic acid	LC/MS polar	33434	C00499	HMDB01209	203					0.74	0.87	1.03	1.22		0.0475	0.0258	0.2277	0.1669	0.4897	0.2423	0.0599	0.0531	0.3401	0.2222	0.7089	0.3249	0.1824	0.2402		1.1707	1.2104	0.8607	1.0502		100	100	100	100		Nucleotide	Purine Metabolism, (Hypo)Xanthine/Inosine containing	218	99-16-1	2960	175.047
	2444		Purine Metabolism, Adenine containing	adenosine 5'-monophosphate (AMP)	LC/MS pos	32342	C00020	HMDB00045	6083					3.33	3.38	3.3	3.35		0.7208	0.2478	0.0104	0.0163	0.0078	0.0165	0.0876	0.07	0.0304	0.0323	0.935	0.3879	0.0005	0.0066		0.2433	0.8031	0.8092	2.713		100	88	50	100		Nucleotide	Purine Metabolism, Adenine containing	209	149022-20-8	1208	348.07
	2451			adenosine	LC/MS pos	555	C00212	HMDB00050	60961					1.81	7.17	0.31	1.24		0.5981	0.2126	0.5262	0.3056	0.0037	0.0097	0.073	0.0607	0.0141	0.0179	0.0849	0.0715	0.0118	0.0493		1.4918	0.4678	2.7024	3.3562		100	100	100	100		Nucleotide	Purine Metabolism, Adenine containing	798	58-61-7	1625.3	268.104
	2452			adenine	LC/MS pos	554	C00147	HMDB00034	190					1.72	3.42	1.29	2.55		0.0677	0.0342	0.0963	0.0911	0.3808	0.2075	0.4811	0.2564	0.0584	0.0536	0.5617	0.2823	0.0754	0.1442		0.8167	1.0511	1.4079	3.5924		100	100	100	100		Nucleotide	Purine Metabolism, Adenine containing	880	73-24-5	1002	136.062
	2457			N1-methyladenosine	LC/MS pos	15650	C02494	HMDB03331	27476					1.05	0.89	1.03	0.87		0.4937	0.181	0.1933	0.1504	0.0888	0.0839	0.4557	0.2485	0.0934	0.0771	0.7632	0.3428	0.0371	0.0939		1.0168	1.0461	1.0686	0.9299		100	100	100	100		Nucleotide	Purine Metabolism, Adenine containing	1242	15763-06-1	1399	282.12
	2467			N6-carbamoylthreonyladenosine	LC/MS pos	35157		HMDB41623	161466					0.84	0.87	1.01	1.05		0.02	0.0128	0.7161	0.3706	0.6981	0.2994	0.0529	0.048	0.1535	0.117	0.9863	0.4033	0.5956	0.5003		1.0792	1.092	0.9041	0.9504		100	100	100	100		Nucleotide	Purine Metabolism, Adenine containing	100001415	24719-82-2	2673	413.142
	2476			N6-succinyladenosine	LC/MS pos	48130		HMDB00912						0.65	0.34	1.59	0.84		3.8803e-06	1.1125e-05	0.5042	0.2963	0.0271	0.0396	0.0235	0.0257	4.1681e-06	4.0097e-05	0.0423	0.0407	0.2515	0.2944		1.2648	2.008	0.8215	0.6888		100	100	100	100		Nucleotide	Purine Metabolism, Adenine containing	100001664	4542-23-8	2222	384.115
	2479		Purine Metabolism, Guanine containing	guanosine 5'- monophosphate (5'-GMP)	LC/MS pos	2849	C00144	HMDB01397	6804					0.82	1.78	1.46	3.14		0.4562	0.17	0.0099	0.0157	0.0056	0.0129	0.0129	0.0165	0.1234	0.0971	0.8701	0.3725	0.0003	0.0051		0.6536	0.9519	0.5374	1.6899		100	88	88	100		Nucleotide	Purine Metabolism, Guanine containing	347	5550-12-09	1300	364.065
	2484			guanosine	LC/MS neg	1573	C00387	HMDB00133	6802					0.96	1.16	0.69	0.83		0.9583	0.3075	0.3576	0.2369	0.3695	0.2039	0.5483	0.2833	0.5007	0.3019	0.2021	0.138	0.987	0.6381		1.1276	0.7795	1.0878	0.9032		100	100	100	100		Nucleotide	Purine Metabolism, Guanine containing	1099	118-00-3	1662	282.084
	2485			guanine	LC/MS pos	32352	C00242	HMDB00132	764					0.19	0.73	0.54	2.13		1.5559e-05	3.5457e-05	0.4136	0.2631	0.0046	0.0115	2.6373e-06	2.6006e-05	0.1433	0.1111	0.0099	0.0129	0.1225	0.1914		2.4528	1.3303	0.4579	0.9735		100	88	63	88		Nucleotide	Purine Metabolism, Guanine containing	172	73-40-5	1035	152.057
	2487			7-methylguanine	LC/MS pos	35114	C02242	HMDB00897	11361					0.86	0.88	1.07	1.09		0.0005	0.0007	0.0472	0.0533	0.803	0.3281	0.0065	0.0098	0.0152	0.0187	0.2078	0.1402	0.111	0.1797		1.0607	1.1321	0.911	0.9934		100	100	100	100		Nucleotide	Purine Metabolism, Guanine containing	100001456	578-76-7	1395.6	166.072
	2491			N1-methylguanosine	LC/MS pos	31609		HMDB01563	96373					0.9	0.85	1	0.95		0.006	0.0046	0.645	0.3491	0.6523	0.2877	0.0859	0.0692	0.0221	0.0259	0.9942	0.4043	0.5201	0.463		1.0478	1.0517	0.9399	0.8932		100	100	100	100		Nucleotide	Purine Metabolism, Guanine containing	100001122	2140-65-0	1869	298.115
	2493			N2,N2-dimethylguanosine	LC/MS pos	35137		HMDB04824	92919					1.17	0.71	1.3	0.78		0.2789	0.1114	0.8667	0.4176	0.0157	0.0271	0.308	0.1873	0.0147	0.0184	0.0627	0.055	0.1004	0.1694		0.9234	1.1964	1.0828	0.8447		75	100	88	75		Nucleotide	Purine Metabolism, Guanine containing	100001412	2140-67-2	2168	312.13
	2503		Pyrimidine Metabolism, Orotate containing	N-carbamoylaspartate	LC/MS polar	1594	C00438	HMDB00828	93072					0.87	0.94	1.2	1.3		0.3376	0.131	0.1177	0.1043	0.8784	0.3481	0.431	0.2406	0.5661	0.336	0.3107	0.1885	0.2214	0.2698		0.9889	1.1819	0.8567	1.1114		100	100	100	100		Nucleotide	Pyrimidine Metabolism, Orotate containing	1108	923-37-5	3800	175.036
	2505			orotate	LC/MS polar	1505	C00295	HMDB00226	967					0.91	0.84	1.05	0.97		0.0228	0.0141	0.9324	0.4368	0.4771	0.2393	0.2426	0.1562	0.0352	0.0368	0.5731	0.2861	0.6569	0.5305		1.0464	1.0985	0.9544	0.9279		100	100	100	100		Nucleotide	Pyrimidine Metabolism, Orotate containing	445	50887-69-9	1638.1	155.01
	2507			orotidine	LC/MS polar	35172	C01103	HMDB00788	92751					0.84	0.69	1.18	0.97		0.0011	0.0012	0.3277	0.2218	0.224	0.1518	0.1026	0.0801	0.0018	0.0039	0.1245	0.0973	0.8624	0.6035		1.0128	1.1959	0.8532	0.824		100	100	100	100		Nucleotide	Pyrimidine Metabolism, Orotate containing	100001416	314-50-1	2250	287.052
	2512		Pyrimidine Metabolism, Uracil containing	uridine 5'-monophosphate (UMP)	LC/MS polar	2856	C00105	HMDB00288	6030					1.46	2.36	2.06	3.34		0.0566	0.0294	0.005	0.0095	0.0448	0.0525	0.9377	0.4042	0.0073	0.0105	0.5089	0.2627	0.0011	0.0113		0.3646	0.752	0.5305	1.7743		88	75	38	100		Nucleotide	Pyrimidine Metabolism, Uracil containing	869	3387-36-8	4150	323.029
	2517			uridine	LC/MS neg	606	C00299	HMDB00296	6029					1.32	0.97	1.01	0.74		0.1415	0.0628	0.0563	0.062	0.1115	0.0972	0.0338	0.0348	0.9273	0.4831	0.8073	0.3563	0.0158	0.0617		0.9095	0.9159	1.2023	0.8895		100	100	100	100		Nucleotide	Pyrimidine Metabolism, Uracil containing	535	58-96-8	1457.6	243.062
	2518			uracil	LC/MS pos	605	C00106	HMDB00300	1174					0.95	0.41	1.2	0.51		0.0031	0.0027	0.0402	0.0472	0.0109	0.0201	0.7238	0.347	0.0002	0.0008	0.6867	0.3198	0.0018	0.0145		1.1443	1.376	1.0907	0.5573		100	100	100	100		Nucleotide	Pyrimidine Metabolism, Uracil containing	825	66-22-8	1152.2	113.035
	2519			pseudouridine	LC/MS neg	33442	C02067	HMDB00767	15047					0.88	1.09	0.71	0.87		0.8048	0.2694	0.001	0.0024	0.0848	0.0824	0.161	0.1136	0.2864	0.193	0.0006	0.0013	0.1884	0.2453		1.1113	0.7889	0.9835	0.859		100	100	100	100		Nucleotide	Pyrimidine Metabolism, Uracil containing	821	1445-07-4	1100	243.062
	2520			5-methyluridine (ribothymidine)	LC/MS neg	35136		HMDB00884	445408					0.82	0.82	0.72	0.72		0.0619	0.0317	0.0016	0.0037	0.9476	0.3639	0.1661	0.1159	0.1949	0.1408	0.0179	0.0206	0.0222	0.072		1.3225	0.9502	1.0888	0.7792		100	100	100	100		Nucleotide	Pyrimidine Metabolism, Uracil containing	100001446	1463-10-1	1778.1	257.078
	2527			5,6-dihydrouracil	LC/MS pos	1559	C00429	HMDB00076	649					1.04	0.7	1.17	0.79		0.0104	0.0073	0.4786	0.2888	0.0013	0.0053	0.5592	0.2871	0.0001	0.0004	0.0524	0.048	0.0051	0.0278		0.9954	1.1638	1.0314	0.8106		100	100	100	100		Nucleotide	Pyrimidine Metabolism, Uracil containing	1125	504-07-4	1148	115.05
	2531			2'-deoxyuridine	LC/MS neg	1412	C00526	HMDB00012	13712					0.91	0.75	0.85	0.7		0.0007	0.0008	3.3518e-05	0.0002	0.047	0.0541	0.2347	0.153	0.0003	0.0009	0.0534	0.0485	3.1279e-05	0.0009		1.1624	0.9914	1.0533	0.7392		100	100	100	88		Nucleotide	Pyrimidine Metabolism, Uracil containing	536	951-78-0	1585.5	111.02
	2533			3-ureidopropionate	LC/MS pos	3155	C02642	HMDB00026	111					0.7	0.6	0.85	0.73		0.0008	0.0009	0.0254	0.0329	0.389	0.2114	0.0522	0.0477	0.0029	0.0055	0.3021	0.1853	0.0298	0.0861		1.319	1.1241	0.9268	0.6779		100	100	100	100		Nucleotide	Pyrimidine Metabolism, Uracil containing	1053	462-88-4	1090.6	133.061
	2534			beta-alanine	GC/MS	35838	C00099	HMDB00056	239					0.53	0.82	0.99	1.54		0.1235	0.0563	0.2699	0.1901	0.4506	0.234	0.1073	0.0827	0.5652	0.336	0.8007	0.3558	0.192	0.2483		0.9446	0.9376	0.4969	0.7653		75	88	38	75		Nucleotide	Pyrimidine Metabolism, Uracil containing	244	56-41-7;107-95-9	1582.3	334.1
	2535			N-acetyl-beta-alanine	LC/MS pos	37432	C01073		76406					1.36	1.13	1	0.83		0.0017	0.0017	0.1209	0.1061	0.1344	0.1123	0.0014	0.0028	0.1834	0.1339	0.9674	0.3977	0.0346	0.0928		0.9491	0.9488	1.2879	1.0678		100	100	100	100		Nucleotide	Pyrimidine Metabolism, Uracil containing	100002102	3025-95-4	1471	132.066
	2540		Pyrimidine Metabolism, Cytidine containing	cytidine 5'-monophosphate (5'-CMP)	LC/MS pos	2372	C00055	HMDB00095	6131					1.05	0.95	1.39	1.25		0.4996	0.1823	0.0923	0.0893	0.934	0.36	0.5916	0.2998	0.6743	0.3852	0.2505	0.1604	0.207	0.2575		0.8504	1.1786	0.8947	1.1224		100	100	100	100		Nucleotide	Pyrimidine Metabolism, Cytidine containing	282	63-37-6	890	324.059
	2543			cytidine	LC/MS pos	514	C00475	HMDB00089	6175					1.52	1.06	1.09	0.76		0.0035	0.003	0.188	0.1472	0.0361	0.0468	0.0007	0.0017	0.4911	0.2985	0.5518	0.2798	0.0181	0.0678		0.8199	0.8959	1.245	0.9465		100	100	100	100		Nucleotide	Pyrimidine Metabolism, Cytidine containing	827	65-46-3	1075.9	244.093
	2546			5-methylcytidine	LC/MS neg	22119		HMDB00982	92918					0.76	0.82	0.93	1.01		0.0345	0.02	0.7515	0.3786	0.6799	0.2968	0.0725	0.0607	0.2121	0.1513	0.6065	0.297	0.9457	0.6272		1.1577	1.0779	0.8786	0.885		100	100	100	100		Nucleotide	Pyrimidine Metabolism, Cytidine containing	100000763	2140-61-6	1607.9	256.094
	2547			N4-acetylcytidine	LC/MS pos	35130		HMDB05923	107461					0.76	0.7	0.95	0.87		3.6366e-06	1.0597e-05	0.0932	0.0894	0.4884	0.2423	0.0013	0.0027	9.2469e-05	0.0004	0.4699	0.2494	0.0955	0.166		1.1541	1.0935	0.8818	0.7688		100	100	100	100		Nucleotide	Pyrimidine Metabolism, Cytidine containing	100001413	3768-18-1	2040	286.103
	2553			2'-deoxycytidine	LC/MS pos	15949	C00881	HMDB00014	13711					1.04	0.95	1.01	0.91		0.8162	0.2717	0.1914	0.1494	0.1409	0.1165	0.3728	0.2179	0.2262	0.1578	0.9015	0.3809	0.0532	0.1167		1.0218	1.0317	1.0674	0.9753		100	100	100	100		Nucleotide	Pyrimidine Metabolism, Cytidine containing	100000125	951-77-9	1252.2	228.098
	2554			5-methyl-2'-deoxycytidine	LC/MS pos	38159	C03592	HMDB02224	440055					1.04	0.91	1.01	0.89		0.749	0.2565	0.3068	0.211	0.1506	0.1216	0.4211	0.2378	0.2133	0.1518	0.7597	0.3423	0.0858	0.1565		0.9964	1.0087	1.0395	0.9224		100	100	100	100		Nucleotide	Pyrimidine Metabolism, Cytidine containing	100002300	838-07-3	1481	242.114
	2559		Pyrimidine Metabolism, Thymine containing	thymidine	LC/MS pos	2183	C00214	HMDB00273	5789					1.05	0.83	1.06	0.84		0.1263	0.0572	0.1625	0.1333	0.0086	0.0174	0.3837	0.2212	0.0042	0.0071	0.3331	0.1983	0.0054	0.0283		0.9803	1.0432	1.0317	0.8636		100	100	100	100		Nucleotide	Pyrimidine Metabolism, Thymine containing	872	50-89-5	1979.5	243.098
	2560			thymine	LC/MS neg	604	C00178	HMDB00262	1135					0.78	0.59	1.12	0.85		0.0029	0.0026	0.9547	0.4416	0.1787	0.1336	0.1942	0.131	0.0028	0.0055	0.3184	0.1922	0.3579	0.3762		1.1844	1.3212	0.9244	0.7855		100	100	100	88		Nucleotide	Pyrimidine Metabolism, Thymine containing	882	65-71-4	1654	125.036
	2561			5,6-dihydrothymine	LC/MS pos	1418	C00906	HMDB00079	93556					0.42	0.49	0.95	1.1		3.1658e-06	9.5378e-06	0.7062	0.3692	0.9182	0.3568	0.0003	0.0008	0.0004	0.0012	0.846	0.3673	0.7345	0.5539		1.4936	1.418	0.6307	0.6935		100	100	100	100		Nucleotide	Pyrimidine Metabolism, Thymine containing	158	696-04-8	1654.2	129.066
	2565	Cofactors and Vitamins	Nicotinate and Nicotinamide Metabolism	quinolinate	LC/MS polar	1899	C03722	HMDB00232	1066					1.41	1.03	0.87	0.64		0.1627	0.0705	0.13	0.1124	0.1262	0.1073	0.0422	0.0415	0.9206	0.4818	0.9908	0.4037	0.0349	0.0928		0.9437	0.8173	1.328	0.8434		100	100	100	100		Cofactors and Vitamins	Nicotinate and Nicotinamide Metabolism	182	89-00-9	3000	166.015
	2567			nicotinate ribonucleoside	LC/MS pos	33471	C05841	HMDB06809	161234					0.4	0.21	6.11	3.27		1.0318e-05	2.5831e-05	1.0789e-07	1.3724e-06	0.0212	0.0336	0.0483	0.0451	6.7518e-06	5.5364e-05	2.6503e-07	2.1415e-06	0.0028	0.0199		0.4343	2.6534	0.1729	0.5659		63	100	0	88		Cofactors and Vitamins	Nicotinate and Nicotinamide Metabolism	100001316	2625-49-2	1085	256.082
	2569			nicotinamide	LC/MS pos	594	C00153	HMDB01406	936					0.74	0.78	1.16	1.23		0.0007	0.0008	0.0464	0.0529	0.7222	0.3039	0.0066	0.01	0.0219	0.0258	0.2328	0.1522	0.0951	0.166		1.0867	1.2624	0.8013	0.9825		100	100	100	100		Cofactors and Vitamins	Nicotinate and Nicotinamide Metabolism	432	98-92-0	1271.1	123.055
	2581			1-methylnicotinamide	LC/MS pos	27665	C02918	HMDB00699	10129985					0.51	0.39	1.93	1.48		0.0003	0.0005	0.0134	0.0193	0.4551	0.2352	0.0259	0.0278	0.0019	0.004	0.0231	0.025	0.1937	0.2486		1.0894	2.1055	0.5567	0.8241		88	100	50	88		Cofactors and Vitamins	Nicotinate and Nicotinamide Metabolism	55	1005-24-9	691.3	137.071
	2586			trigonelline (N'-methylnicotinate)	LC/MS pos	32401	C01004	HMDB00875	5570					0.48	0.61	0.89	1.12		1.5198e-05	3.5413e-05	0.7196	0.3706	0.3411	0.193	0.0002	0.0005	0.0055	0.0085	0.3546	0.208	0.6717	0.5354		1.4616	1.3036	0.7039	0.7887		100	100	100	100		Cofactors and Vitamins	Nicotinate and Nicotinamide Metabolism	100001092	535-83-1	771.8	138.055
	2588			N1-Methyl-2-pyridone-5-carboxamide	LC/MS pos	40469	C05842	HMDB04193	69698					1.02	1.4	0.9	1.23		0.0258	0.0155	0.6698	0.358	0.0424	0.0511	0.8731	0.3877	0.0037	0.0066	0.2405	0.1559	0.0813	0.1514		0.9637	0.8626	0.9831	1.2072		100	100	100	100		Cofactors and Vitamins	Nicotinate and Nicotinamide Metabolism	100001468	701-44-0	1688	153.066
	2591		Riboflavin Metabolism	riboflavin (Vitamin B2)	LC/MS pos	1827	C00255	HMDB00244	493570					0.76	0.85	0.93	1.04		0.0274	0.0164	0.4314	0.2724	0.7193	0.3033	0.1758	0.1213	0.0674	0.0603	0.7605	0.3423	0.4185	0.4144		1.2764	1.1889	0.9745	1.012		100	100	100	100		Cofactors and Vitamins	Riboflavin Metabolism	500	83-88-5	3098.3	377.146
	2592			flavin adenine dinucleotide (FAD)	LC/MS neg	2134	C00016	HMDB01248	643975					1.04	1.08	0.84	0.87		0.3297	0.1288	0.0058	0.0105	0.9105	0.3548	0.5394	0.2807	0.441	0.274	0.0368	0.0367	0.0517	0.1146		1.0331	0.8699	1.0761	0.9377		100	100	100	100		Cofactors and Vitamins	Riboflavin Metabolism	327	146-14-5;84366-81-4	2425	784.15
	2594		Pantothenate and CoA Metabolism	pantothenate	LC/MS neg	1508	C00864	HMDB00210	6613					1.36	1.06	1.25	0.98		0.0056	0.0043	0.1432	0.122	0.0413	0.0511	0.0011	0.0024	0.5487	0.3285	0.0155	0.0183	0.6579	0.5305		0.8136	1.0154	1.1029	1.076		100	100	100	100		Cofactors and Vitamins	Pantothenate and CoA Metabolism	1024	137-08-6	1498.7	218.103
	2602		Ascorbate and Aldarate Metabolism	ascorbate (Vitamin C)	GC/MS	1640	C00072	HMDB00044						0.79	3.77	0.25	1.19		0.4726	0.175	0.2918	0.2034	0.3523	0.1975	0.8786	0.3879	0.2465	0.1685	0.1642	0.1197	0.9283	0.6214		2.2994	0.5733	1.8119	2.163		75	88	100	100		Cofactors and Vitamins	Ascorbate and Aldarate Metabolism	233	134-03-2	1850.1	332.1
	2604			threonate	LC/MS polar	27738	C01620	HMDB00943	151152					1.34	1.03	1.2	0.92		0.0255	0.0155	0.5993	0.3364	0.0414	0.0511	0.0036	0.0061	0.8767	0.4641	0.0695	0.0599	0.2657	0.3081		0.8632	1.0316	1.159	1.0632		100	100	100	100		Cofactors and Vitamins	Ascorbate and Aldarate Metabolism	100001022	70753-61-6	2384	135.03
	2605			arabonate	GC/MS	37516	C00878	HMDB00539	122045					0.67	0.6	1.26	1.11		0.0012	0.0012	0.2203	0.1654	0.7377	0.3098	0.028	0.0296	0.0092	0.013	0.2699	0.1687	0.5227	0.463		1.2202	1.5335	0.8236	0.9156		100	100	100	100		Cofactors and Vitamins	Ascorbate and Aldarate Metabolism	100001937	7643-75-7	1736	292.1
	2606			oxalate (ethanedioate)	LC/MS neg	20694	C00209	HMDB02329	971					1.3	1.07	1.21	1		0.0031	0.0027	0.0831	0.0826	0.0523	0.0584	0.0009	0.002	0.3995	0.2539	0.0115	0.0144	0.8722	0.6057		0.8461	1.0236	1.1014	1.0995		100	100	100	100		Cofactors and Vitamins	Ascorbate and Aldarate Metabolism	100000841	144-62-7	603	88.988
	2607			gulonic acid*	LC/MS polar	46957			9794176					0.69	0.99	0.37	0.53		0.083	0.0409	1.9122e-09	2.8617e-08	0.0664	0.0696	0.014	0.0177	0.937	0.4831	3.6108e-08	4.1193e-07	4.8145e-05	0.0012		1.787	0.6625	1.2322	0.6586		100	100	100	100		Cofactors and Vitamins	Ascorbate and Aldarate Metabolism	100001586	20246-53-1	2750	195.051
	2608		Tocopherol Metabolism	alpha-tocopherol	GC/MS	1561	C02477	HMDB01893	14985					0.99	0.77	1.6	1.25		0.0463	0.0253	6.0446e-05	0.0002	0.0803	0.0795	0.8496	0.3804	0.0101	0.0141	7.8917e-05	0.0002	0.0498	0.1125		0.8418	1.3502	0.8309	1.0396		100	100	100	100		Cofactors and Vitamins	Tocopherol Metabolism	1105	59-02-9;10191-41-0	2305.4	502.5
	2627		Folate Metabolism	5-methyltetrahydrofolate (5MeTHF)	LC/MS neg	18330	C00440	HMDB01396	146					0.6	0.92	0.26	0.4		0.1621	0.0705	2.161e-07	2.1097e-06	0.3222	0.1892	0.095	0.0752	0.7643	0.4214	6.6309e-06	3.0876e-05	0.0003	0.0051		1.5886	0.4179	0.9581	0.3857		88	13	88	25		Cofactors and Vitamins	Folate Metabolism	1244	68703-91-3;68792-52-9	1820	458.179
	2628		Tetrahydrobiopterin Metabolism	biopterin	LC/MS pos	12358	C06313	HMDB00468	445040					0.72	0.58	1.51	1.21		0.021	0.0132	0.378	0.2472	0.3553	0.1982	0.2961	0.1811	0.0236	0.0272	0.2048	0.1391	0.9753	0.6363		0.9997	1.509	0.7194	0.8724		75	100	75	50		Cofactors and Vitamins	Tetrahydrobiopterin Metabolism	1548	22150-76-1	1562.7	238.093
	2629			dihydrobiopterin	LC/MS pos	35129	C00268	HMDB00038	1879					0.73	0.81	0.64	0.72		8.8486e-05	0.0002	1.7464e-07	1.9318e-06	0.2879	0.1759	0.0004	0.0011	0.0199	0.0239	4.9006e-06	2.4848e-05	0.0003	0.0051		1.4657	0.938	1.0629	0.7639		100	100	100	100		Cofactors and Vitamins	Tetrahydrobiopterin Metabolism	100001506	6779-87-9	1515	240.109
	2642		Hemoglobin and Porphyrin Metabolism	heme	LC/MS pos	41754	C00032	HMDB03178	26945					1.56	1.4	5.65	5.07		0.9997	0.3167	0.014	0.0199	0.2556	0.1648	0.4186	0.237	0.419	0.2633	0.0124	0.0151	0.3105	0.3424		0.8603	4.8594	1.3394	6.7858		100	100	100	100		Cofactors and Vitamins	Hemoglobin and Porphyrin Metabolism	100001386	14875-96-8	5003	616.176
	2643			bilirubin (Z,Z)	LC/MS neg	43807	C00486	HMDB00054	5280352					1.05	1	1.04	0.99		0.8205	0.2726	0.5486	0.315	0.8975	0.3512	0.8014	0.3714	0.9447	0.4836	0.7383	0.3356	0.6062	0.508		0.9325	0.9736	0.9784	0.9718		100	100	100	88		Cofactors and Vitamins	Hemoglobin and Porphyrin Metabolism	1090	635-65-4	4796.2	583.256
	2644			bilirubin (E,E)*	LC/MS neg	32586			5315454					0.93	1.18	0.99	1.27		0.7664	0.26	0.749	0.3786	0.5736	0.2685	0.8502	0.3804	0.5437	0.3262	0.863	0.3701	0.5331	0.4674		0.8793	0.8727	0.8162	1.0339		88	88	100	88		Cofactors and Vitamins	Hemoglobin and Porphyrin Metabolism	100001950	114-25-0	4294	583.256
	2668		Vitamin B6 Metabolism	pyridoxal	LC/MS pos	1651	C00250	HMDB01545	1050					1.19	0.98	1.32	1.08		0.37	0.1423	0.1661	0.1358	0.5232	0.2513	0.2801	0.1748	0.8528	0.4541	0.1547	0.115	0.5878	0.4971		0.8498	1.1208	1.0148	1.0997		100	100	100	100		Cofactors and Vitamins	Vitamin B6 Metabolism	491	65-22-5	1203	168.066
	2669			pyridoxate	LC/MS neg	31555	C00847	HMDB00017	6723					0.79	0.96	0.96	1.16		0.0492	0.0263	0.4759	0.2883	0.2017	0.1423	0.0245	0.0265	0.6007	0.3535	0.6825	0.3184	0.1622	0.2246		1.1431	1.0941	0.9036	1.0496		100	100	100	100		Cofactors and Vitamins	Vitamin B6 Metabolism	100001121	82-82-6	2185	182.046
	2671	Xenobiotics	Benzoate Metabolism	hippurate	LC/MS neg	15753	C01586	HMDB00714	464					1.06	1.02	1.06	1.02		0.5033	0.1833	0.58	0.3287	0.6936	0.2994	0.453	0.2482	0.8445	0.4514	0.5037	0.2612	0.9098	0.6184		0.9383	0.9951	0.9967	1.016		100	100	100	100		Xenobiotics	Benzoate Metabolism	100000014	495-69-2	2106.9	178.051
	2675			2-hydroxyhippurate (salicylurate)	LC/MS neg	18281	C07588	HMDB00840	10253					0.79	0.55	0.92	0.63		0.0874	0.0425	0.2175	0.1647	0.3788	0.2075	0.5402	0.2807	0.0699	0.0623	0.7969	0.3551	0.1386	0.2051		1.216	1.1181	0.9626	0.6103		100	88	88	50		Xenobiotics	Benzoate Metabolism	1869	487-54-7	2184	194.046
	2677			4-hydroxyhippurate	LC/MS neg	35527		HMDB13678	151012					0.65	0.75	1.39	1.62		0.0253	0.0154	0.0096	0.0155	0.9783	0.3705	0.1098	0.0833	0.1021	0.0838	0.0571	0.0511	0.0618	0.13		1.037	1.4419	0.6696	1.0846		100	100	100	100		Xenobiotics	Benzoate Metabolism	100001423	2482-25-9	1475	194.046
	2683			benzoate	LC/MS neg	15778	C00180	HMDB01870	243					2.01	0.97	1.53	0.74		0.082	0.0405	0.9575	0.4417	0.0586	0.0627	0.0125	0.0162	0.9061	0.476	0.1858	0.1298	0.1631	0.2246		0.6123	0.9338	1.2282	0.9035		100	100	100	100		Xenobiotics	Benzoate Metabolism	100000008	65-85-0	1750	121.029
	2700			catechol sulfate	LC/MS neg	35320	C00090	HMDB59724	3083879					0.28	9.99	0.01	0.42		0.3824	0.1459	4.84e-10	9.4722e-09	2.2575e-05	0.0004	0.0062	0.0095	0.0002	0.0008	6.8745e-11	1.2066e-09	0.006	0.0304		6.4351	0.0766	1.8273	0.7654		100	88	100	100		Xenobiotics	Benzoate Metabolism	100001605	4918-96-1	1906	188.986
	2702			O-methylcatechol sulfate	LC/MS neg	46111			22473					0.12	0.72	0.31	1.83		7.0072e-06	1.8667e-05	0.2389	0.1736	0.0018	0.0063	7.4227e-07	1.0333e-05	0.1591	0.1206	0.0027	0.0043	0.1221	0.1914		2.5871	0.8133	0.3211	0.589		100	100	50	75		Xenobiotics	Benzoate Metabolism	100004208		2344	203.002
	2705			4-methylcatechol sulfate	LC/MS neg	46146								1.71	9.68	0.12	0.67		9.0376e-06	2.3282e-05	9.564e-06	5.2793e-05	0.0041	0.0106	0.118	0.0884	1.6479e-06	1.9156e-05	1.7143e-06	9.7786e-06	0.1213	0.1912		1.3597	0.1612	2.324	1.5607		100	88	100	100		Xenobiotics	Benzoate Metabolism	100004111		2665	203.002
	2715			4-ethylphenylsulfate	LC/MS neg	36099	C13637							0.85	0.91	0	0		0.9207	0.2997	0	2.8e-14	0.818	0.3323	0.9263	0.4014	0.8157	0.441	1.68e-12	6.3892e-11	8.84e-13	3.1779e-10		5.5274	0.0193	4.6964	0.0175		100	75	100	75		Xenobiotics	Benzoate Metabolism	100001756	123-07-9	3580	201.023
	2716			4-vinylphenol sulfate	LC/MS neg	36098	C05627	HMDB04072	6426766					0.62	0.17	53.56	14.96		0.0006	0.0007	1.47e-13	5.815e-12	0.027	0.0396	0.2806	0.1748	0.0001	0.0005	1.1329e-11	3.222e-10	2.1943e-08	2.6292e-06		0.3146	16.8495	0.1955	2.9241		100	100	100	100		Xenobiotics	Benzoate Metabolism	100001755	2628-17-3	3320	199.007
	2727			3-(2-hydroxyphenyl)propionate	LC/MS neg	35634	C01198	HMDB33752	873					1.17	0.81	1.33	0.92		0.5344	0.1919	0.0603	0.065	0.0059	0.0135	0.1081	0.0827	0.0165	0.0202	0.0016	0.0029	0.4772	0.4398		0.8998	1.1958	1.0501	0.9706		100	100	100	100		Xenobiotics	Benzoate Metabolism	100001623	495-78-3	2530	165.056
	2728			3-methoxycatechol sulfate (1)	LC/MS neg	48763								1	2.43	1.04	2.53		0.2597	0.1045	0.184	0.1455	0.2597	0.1669	1	0.4211	0.1149	0.0927	0.8821	0.3748	0.0865	0.1569		0.621	0.6447	0.621	1.5689		0	13	0	38		Xenobiotics	Benzoate Metabolism	100006375		2163	218.997
	2729			3-methoxycatechol sulfate (2)	LC/MS neg	48752								0.7	0.99	0.74	1.05		0.0409	0.023	0.1243	0.1087	0.0331	0.0459	0.0044	0.0072	0.9447	0.4836	0.0115	0.0144	0.6456	0.5298		1.0861	0.806	0.7636	0.8017		88	25	13	38		Xenobiotics	Benzoate Metabolism	100006376		2200	218.997
	2730			methyl-4-hydroxybenzoate sulfate	LC/MS neg	48429								1	0.08	70.32	5.91		9.7208e-08	6.171e-07	4e-15	2.75e-13	9.7208e-08	4.0989e-06	1	0.4211	8.459e-11	7.8662e-09	2e-15	1.31e-13	3.5334e-06	0.0002		0.0529	3.7197	0.0529	0.3126		13	100	0	100		Xenobiotics	Benzoate Metabolism	100006116		2873	230.997
	2760		Food Component/Plant	2-piperidinone	LC/MS pos	43400			12665					1.06	1.02	1.07	1.03		0.2408	0.0984	0.0853	0.0838	0.4843	0.2414	0.1883	0.1285	0.7318	0.4093	0.0889	0.0738	0.4535	0.4256		0.9407	1.0104	0.9989	1.0256		100	100	100	100		Xenobiotics	Food Component/Plant	100004295	675-20-7	2047	100.076
	2807			genistein	LC/MS neg	32448	C06563	HMDB03217	5280961					0.52	0.3	3.33	1.89		2.1075e-05	4.5135e-05	2.0348e-05	9.5866e-05	0.0802	0.0795	0.0277	0.0295	3.7439e-05	0.0002	3.6519e-05	0.0001	0.0271	0.0806		1.1887	3.9587	0.6183	1.1679		100	100	100	100		Xenobiotics	Food Component/Plant	100001221	446-72-0	3754	269.046
	2846			2,3-dihydroxyisovalerate	LC/MS polar	38276	C04039	HMDB12141	677					0.37	0.8	0.46	0.98		0.0186	0.012	0.2222	0.1662	0.3273	0.1905	0.0198	0.0228	0.2977	0.1987	0.1235	0.0969	0.8602	0.6035		2.2777	1.0405	0.851	0.831		100	100	100	100		Xenobiotics	Food Component/Plant	100002417	1756-18-9	1050	133.051
	2852			2-isopropylmalate	LC/MS polar	15667	C02504	HMDB00402	77					0.22	2.99	0.09	1.25		0.2939	0.1169	0.0007	0.0019	3.4755e-05	0.0005	0.0002	0.0007	0.0111	0.015	1.1566e-06	7.5401e-06	0.44	0.4191		3.4988	0.3251	0.7765	0.9713		100	50	88	88		Xenobiotics	Food Component/Plant	100000409	3237-44-3	2605	175.061
	2853			2-oxindole-3-acetate	LC/MS pos	40479			3080590					0.18	0.85	0.75	3.51		0.0013	0.0013	0.2419	0.1748	0.0007	0.0034	1.4864e-05	8.1809e-05	0.8572	0.4555	0.0735	0.0628	0.0014	0.0131		2.3761	1.7839	0.4347	1.5249		100	100	100	100		Xenobiotics	Food Component/Plant	100003109	2971-31-5	3208	192.066
	2874			gluconate	LC/MS polar	587	C00257	HMDB00625	10690					0.61	0.24	3.36	1.31		0.003	0.0026	0.0125	0.0187	0.1907	0.1386	0.1887	0.1285	0.003	0.0056	0.0084	0.0114	0.3552	0.3745		0.8694	2.9222	0.5275	0.6907		63	100	50	88		Xenobiotics	Food Component/Plant	338	527-07-1	2922	195.051
	2913			cinnamate	LC/MS neg	12115	C00423	HMDB00930	444539					1.34	0.9	1.19	0.8		0.3523	0.1364	0.6919	0.3644	0.3052	0.1823	0.1703	0.1182	0.945	0.4836	0.6524	0.3089	0.3157	0.346		0.8416	0.9997	1.1249	0.8958		100	100	100	100		Xenobiotics	Food Component/Plant	1259	140-10-3	2878	147.045
	2914			cinnamoylglycine	LC/MS neg	38637		HMDB11621	709625					0.86	1.29	0.55	0.84		0.6107	0.2162	0.0071	0.0122	0.0574	0.0623	0.3086	0.1873	0.0884	0.0736	0.0018	0.0031	0.5188	0.463		1.3699	0.7597	1.1732	0.9797		100	100	100	100		Xenobiotics	Food Component/Plant	100002253	16534-24-0	3127	204.067
	2926			daidzein	LC/MS pos	32453	C10208	HMDB03312	5281708					0.6	0.41	2.32	1.58		6.8613e-05	0.0001	6.5725e-05	0.0003	0.095	0.0879	0.0468	0.0443	0.0001	0.0004	9.9036e-05	0.0003	0.0458	0.1068		1.1983	2.7782	0.7235	1.1431		100	100	100	100		Xenobiotics	Food Component/Plant	100001219	486-66-8	4179	255.065
	2931			dihydroferulic acid	LC/MS neg	40481			14340					0.26	1.44	1.27	7.13		0.1026	0.0484	0.0183	0.0253	0.3325	0.191	0.0691	0.0584	0.6237	0.3656	0.2917	0.1794	0.0199	0.0708		0.8413	1.0651	0.2146	1.531		63	88	13	63		Xenobiotics	Food Component/Plant	100003432	1135-23-5	1928	195.066
	2937			equol	LC/MS neg	36774	C14131	HMDB02209	91469					0.52	1	0.42	0.81		0.0003	0.0004	4.7308e-06	2.8657e-05	0.0003	0.0021	3.2084e-06	2.7806e-05	1	0.4964	1.7301e-07	1.579e-06	0.2815	0.3233		0.9163	0.388	0.4779	0.388		100	0	25	0		Xenobiotics	Food Component/Plant	100001725	531-95-3;94105-90-5	4565	241.087
	2938			equol glucuronide	LC/MS neg	41948								0.28	1	0.1	0.37		2.1964e-06	7.3663e-06	1.11e-13	5.655e-12	2.1964e-06	5.6191e-05	3.9899e-09	9.247e-08	1	0.4964	6.7e-14	3.069e-12	1.3593e-05	0.0005		1.5541	0.162	0.4408	0.162		100	0	100	0		Xenobiotics	Food Component/Plant	100003895		3215	417.119
	2939			equol sulfate	LC/MS neg	40478								0.43	1	0.21	0.5		3.4883e-05	7.127e-05	3.124e-12	8.8313e-11	3.4883e-05	0.0005	1.4711e-07	2.678e-06	1	0.4964	2.712e-12	8.8383e-11	5.5603e-05	0.0013		1.493	0.318	0.6394	0.318		100	0	100	0		Xenobiotics	Food Component/Plant	100003429		3630	321.044
	2940			ergothioneine	LC/MS pos	37459	C05570	HMDB03045	3032311					1.17	0.63	2.31	1.24		0.3691	0.1423	0.0015	0.0035	0.0343	0.0466	0.3613	0.2127	0.0347	0.0364	0.0004	0.0009	0.3676	0.385		0.8425	1.9449	0.9897	1.2282		100	100	100	100		Xenobiotics	Food Component/Plant	100002154	58511-63-0	823	230.096
	2942			erythritol	GC/MS	20699	C00503	HMDB02994	222285					0.63	0.61	0.96	0.92		2.0162e-06	7.3297e-06	0.4105	0.2618	0.773	0.3205	0.0004	0.001	0.0001	0.0005	0.7033	0.3248	0.4323	0.4181		1.2961	1.2441	0.8204	0.7574		100	100	100	88		Xenobiotics	Food Component/Plant	100000846	149-32-6	1517.5	217
	2944			ferulate	LC/MS neg	35630	C01494	HMDB00954	445858					0.76	0.57	1.58	1.18		0.0719	0.0358	0.2193	0.1651	0.4618	0.2359	0.4333	0.2408	0.0749	0.0649	0.1678	0.1215	0.7209	0.5525		1.1723	1.8509	0.896	1.0561		88	100	88	100		Xenobiotics	Food Component/Plant	100001542	537-98-4	1755	193.051
	2945			ferulic acid 4-sulfate	LC/MS neg	47114		HMDB29200	6305574					0.64	0.43	2.69	1.81		0.0115	0.0079	0.0133	0.0193	0.2792	0.1732	0.267	0.1694	0.0118	0.0156	0.0131	0.0158	0.2854	0.3268		1.1335	3.045	0.7199	1.3051		100	100	100	100		Xenobiotics	Food Component/Plant	100005389	86321-29-1	1225	273.007
	2957			glycitein	LC/MS pos	34024	C14536	HMDB05781	5317750					0.49	0.31	2.22	1.38		0.0012	0.0012	0.0108	0.0165	0.1381	0.1146	0.1531	0.1099	0.0011	0.0027	0.0055	0.008	0.4013	0.4025		0.7216	1.6031	0.3555	0.4905		50	100	13	50		Xenobiotics	Food Component/Plant	100001222	40957-83-3	4248	285.076
	2964			homostachydrine*	LC/MS pos	33009	C08283	HMDB33433	441447					1.39	0.86	0.82	0.51		0.297	0.1179	5.6922e-05	0.0002	0.0249	0.0378	0.0219	0.0247	0.363	0.2339	0.1054	0.0847	2.5857e-05	0.0009		1.036	0.8528	1.4353	0.7355		100	100	100	100		Xenobiotics	Food Component/Plant	100001550	1195-94-4	1211	158.118
	2967			indoleacrylate	LC/MS neg	22114		HMDB00734	15030923					0.17	3.45	0.06	1.18		0.0379	0.0218	4.4562e-06	2.8343e-05	0.0002	0.0017	0.0001	0.0004	0.1635	0.1229	1.3644e-07	1.3535e-06	0.3081	0.3424		5.9079	0.3503	1.0256	1.208		100	100	100	75		Xenobiotics	Food Component/Plant	100000800	1204-06-4	2511	186.056
	2968			indolin-2-one	LC/MS pos	43374	C12312		321710					0.3	0.68	0.2	0.45		6.7419e-05	0.0001	2.2389e-07	2.1097e-06	0.0061	0.0138	9.2666e-06	6.2658e-05	0.2364	0.1632	1.6955e-07	1.579e-06	0.0114	0.049		2.8852	0.5771	0.8688	0.3927		100	63	88	38		Xenobiotics	Food Component/Plant	100004318	59-48-3	3386	134.06
	2990			methyl indole-3-acetate	LC/MS pos	1584		HMDB29738	74706					0.81	0.63	6.95	5.37		0.0178	0.0117	0.0043	0.0086	0.0765	0.0772	0.635	0.3151	0.0046	0.0075	0.0016	0.0029	0.3782	0.3888		0.5443	3.7809	0.4411	2.3674		50	100	38	38		Xenobiotics	Food Component/Plant	1104	1912-33-0	4350	190.086
	2996			N-glycolylneuraminate	LC/MS polar	37123	C03410	HMDB00833	123802					1.64	0.98	1.12	0.67		0.0149	0.0099	0.0768	0.0779	0.0046	0.0115	0.0004	0.001	0.7321	0.4093	0.3857	0.2168	0.0017	0.0145		0.8406	0.9433	1.3753	0.9242		100	100	100	100		Xenobiotics	Food Component/Plant	100001491	1113-83-3	3327.5	324.094
	3026			quinate	LC/MS polar	18335	C00296	HMDB03072	6508					1.59	0.25	7.9	1.25		0.0917	0.044	0.0006	0.0018	0.0381	0.0481	0.7632	0.3598	0.0097	0.0136	0.0002	0.0006	0.2497	0.2933		0.3727	2.9454	0.5914	0.7391		38	88	38	75		Xenobiotics	Food Component/Plant	100000442	77-95-2	2432.9	191.056
	3048			stachydrine	LC/MS pos	34384	C10172	HMDB04827	115244					0.5	0.55	0.85	0.94		1.8715e-06	7.078e-06	0.1824	0.1454	0.5479	0.2604	6.8931e-05	0.0003	0.0007	0.0019	0.1734	0.1229	0.5956	0.5003		1.5429	1.3167	0.7756	0.7255		100	100	100	100		Xenobiotics	Food Component/Plant	100001296	4136-37-2	838.7	144.102
	3069			4-allylphenol sulfate	LC/MS neg	37181								2.06	0.88	2.19	0.94		0.023	0.0141	0.0014	0.0033	0.0013	0.0053	0.0002	0.0007	0.4132	0.2608	2.4865e-05	9.1507e-05	0.9822	0.6373		0.5958	1.3066	1.2248	1.1481		100	100	100	100		Xenobiotics	Food Component/Plant	100001868		3805	213.023
	3070			methyl glucopyranoside (alpha + beta)	LC/MS pos	46144								0.88	0.71	0.34	0.27		0.0633	0.0322	1.317e-12	4.1896e-11	0.6318	0.2852	0.3141	0.1901	0.0983	0.0809	6.5278e-09	9.3088e-08	1.2607e-09	2.2659e-07		1.6524	0.5544	1.4547	0.3961		100	100	100	100		Xenobiotics	Food Component/Plant	100005864		1090	212.113
	3097			4-vinylguaiacol sulfate	LC/MS neg	48442								1	0.3	3.36	1		0.0567	0.0294	0.0567	0.0622	0.0567	0.0623	1	0.4211	0.0089	0.0127	0.0089	0.012	1	0.6396		0.1908	0.6415	0.1908	0.1908		0	50	0	0		Xenobiotics	Food Component/Plant	100006126		3354	229.018
	3098			pyrraline	LC/MS neg	48428								0.39	0.62	0.81	1.29		0.0001	0.0002	0.8488	0.4129	0.2995	0.1813	0.0006	0.0014	0.0243	0.0276	0.3844	0.2168	0.5458	0.4738		1.7507	1.4224	0.6878	0.8874		100	100	100	100		Xenobiotics	Food Component/Plant	100001767	74509-14-1	2304	253.119
	3100			daidzein sulfate (2)	LC/MS neg	48728								0.73	0.52	3.49	2.48		0.0072	0.0053	9.5901e-07	7.3936e-06	0.1858	0.1365	0.2848	0.1769	0.0055	0.0085	1.0035e-05	4.1628e-05	0.0018	0.0145		0.7389	2.5821	0.5404	1.3409		100	100	100	100		Xenobiotics	Food Component/Plant	100006363		3330	333.008
	3102			benzyl alcohol glucuronide	LC/MS neg	48781			9795797					1.95	1.22	1.18	0.74		0.1312	0.0587	0.5857	0.3304	0.1667	0.1292	0.0445	0.0428	0.9246	0.483	0.5442	0.2765	0.1743	0.2343		0.7282	0.8583	1.4177	1.0445		100	100	100	100		Xenobiotics	Food Component/Plant	100006253	5285-02-09	2222	283.082
	3125		Bacterial/Fungal	tartronate (hydroxymalonate)	LC/MS neg	20693	C02287	HMDB35227	45					1.39	0.97	1.63	1.14		0.2106	0.0877	0.0305	0.0379	0.172	0.1313	0.0682	0.0581	0.9328	0.4831	0.0146	0.0174	0.54	0.4711		0.7552	1.2292	1.0501	1.1984		100	88	100	100		Xenobiotics	Bacterial/Fungal	100000840	80-69-3	610	118.999
	3180		Drug	4-acetylphenol sulfate	LC/MS neg	44620			4684006					0.3	0.75	1.12	2.78		0.0182	0.0118	0.1303	0.1124	0.08	0.0795	0.0049	0.0079	0.6285	0.3666	0.8568	0.3691	0.024	0.075		0.9276	1.036	0.2776	0.7731		88	63	25	75		Xenobiotics	Drug	100000711		2375	215.002
	3187			6-oxopiperidine-2-carboxylic acid	LC/MS pos	43231			3014237					0.39	0.55	1.42	2.02		0.003	0.0026	0.2531	0.1819	0.8667	0.3454	0.0223	0.025	0.0378	0.0388	0.4864	0.2551	0.3528	0.3741		1.0407	1.4798	0.402	0.8117		100	100	63	63		Xenobiotics	Drug	100004499	34622-39-4	1826.6	144.066
	3259			hydroquinone sulfate	LC/MS neg	35322	C00530	HMDB02434	161220					0.56	0.71	2.1	2.66		0.2322	0.0953	0.0152	0.0213	0.4196	0.2234	0.1602	0.1135	0.7783	0.4259	0.2221	0.1473	0.0229	0.0725		0.8278	1.7382	0.4613	1.2291		75	50	13	75		Xenobiotics	Drug	100001604	123-31-9	1395	188.986
	3334			salicylate	LC/MS neg	1515	C00805	HMDB01895	338					0.59	0.66	0.95	1.07		0.0039	0.0032	0.9354	0.4368	0.7978	0.3271	0.0229	0.0253	0.0506	0.0484	0.8115	0.3568	0.9014	0.6172		1.4912	1.4221	0.874	0.9319		100	100	100	100		Xenobiotics	Drug	501	69-72-7	2195	137.024
	3418		Chemical	1,2-propanediol	GC/MS	38002	C00583	HMDB01881	1030					1.09	0.96	1.17	1.03		0.7529	0.2569	0.4063	0.2599	0.3363	0.1921	0.3672	0.2156	0.6441	0.3736	0.2083	0.1402	0.9245	0.6203		0.9691	1.134	1.0592	1.0924		100	100	100	100		Xenobiotics	Chemical	100001176	57-55-6	1041	117
	3426			sulfate*	LC/MS neg	46960	C00059	HMDB01448	1118					1.08	1.21	0.76	0.84		0.0569	0.0294	0.0024	0.0051	0.2642	0.1688	0.5543	0.2852	0.0355	0.0369	0.0037	0.0057	0.1302	0.199		1.0736	0.8135	1.1621	0.9811		100	100	100	100		Xenobiotics	Chemical	100002528	14808-79-8	616	96.9601
	3429			O-sulfo-L-tyrosine	LC/MS neg	45413			514186					0.93	0.59	1.32	0.84		0.0005	0.0006	0.5027	0.2963	0.0081	0.0168	0.4425	0.2447	4.6654e-05	0.0002	0.0187	0.0213	0.136	0.2028		0.9899	1.3082	0.922	0.7779		100	100	100	100		Xenobiotics	Chemical	100005384		990	260.023
	3431			1-(3-aminopropyl)-2-pyrrolidone	LC/MS pos	40506			82111					4.68	1.25	2.89	0.77		2.2266e-09	3.0444e-08	0.0008	0.002	6.6593e-07	2.34e-05	2.5426e-11	1.2034e-09	0.1222	0.0968	8.2124e-08	8.5172e-07	0.0761	0.1448		0.3381	0.9767	1.5817	1.2176		100	100	100	100		Xenobiotics	Chemical	100003263	7663-77-6	1350	143.118
	3445			2-aminophenol sulfate	LC/MS neg	43266		HMDB61116	181670					0.31	1.29	0.36	1.49		0.1245	0.0566	0.0892	0.0866	0.0012	0.0053	0.001	0.0023	0.1661	0.1242	0.0007	0.0015	0.2053	0.2569		2.2057	0.7942	0.6859	1.0208		100	100	100	100		Xenobiotics	Chemical	100004322		1677	188.002
	3466			2-hydroxyisobutyrate	GC/MS	22030		HMDB00729	11671					1.52	1.58	0.95	0.99		6.013e-06	1.6443e-05	0.5321	0.3084	0.8935	0.3508	0.0007	0.0016	0.0004	0.0012	0.5915	0.2921	0.7277	0.5536		0.7969	0.7556	1.2091	1.1948		100	100	100	100		Xenobiotics	Chemical	100000748	594-61-6	1107.5	130.9
	3474			S-(3-hydroxypropyl)mercapturic acid (HPMA)	LC/MS neg	44552			3371179					0.72	0.74	0.69	0.72		0.0061	0.0046	0.0021	0.0046	0.9582	0.3668	0.0417	0.0413	0.0488	0.0468	0.0215	0.0236	0.0254	0.0782		1.4352	0.9952	1.0286	0.74		100	100	100	100		Xenobiotics	Chemical	100004568	23127-40-4	1576	220.065
	3488			dimethyl sulfone	LC/MS pos	43424	C11142	HMDB04983	6213					0.33	1.12	0.11	0.37		0.001	0.0011	6.1389e-11	1.5618e-09	0.0002	0.0014	4.9378e-06	3.5411e-05	0.6751	0.3852	5.6361e-11	1.0716e-09	0.0003	0.0051		2.0877	0.232	0.6938	0.2596		100	25	75	25		Xenobiotics	Chemical	100004284	67-71-0	1035	95.0161
	3490			ectoine	LC/MS pos	35651	C06231		126041					0.59	0.61	1.03	1.07		0.0012	0.0012	0.9441	0.4391	0.8979	0.3512	0.0202	0.0231	0.0132	0.0169	0.8884	0.3768	0.9672	0.6357		1.3575	1.4023	0.8021	0.8577		100	100	100	100		Xenobiotics	Chemical	100001635	96702-03-3	823	143.082
	3495			glycolate (hydroxyacetate)	GC/MS	15737	C00160	HMDB00115	757					0.85	0.95	0.8	0.9		0.0873	0.0425	0.006	0.0106	0.2663	0.1689	0.0493	0.0454	0.6555	0.3786	0.0071	0.0099	0.2036	0.256		1.199	0.9601	1.0146	0.9143		100	100	100	100		Xenobiotics	Chemical	203	79-14-1	1119	177
	3516			phenylcarnitine*	LC/MS pos	43265								1	0.92	1.39	1.28		0.9505	0.3055	0.0365	0.0436	0.883	0.3491	0.9521	0.4089	0.8824	0.4662	0.1084	0.0862	0.1586	0.2236		0.9398	1.3041	0.9397	1.1985		100	100	100	100		Xenobiotics	Chemical	100004555	105450-08-6	2629.9	266.139
	3532			N-methylpipecolate	LC/MS pos	47101			11862129;11286529					0.85	0.74	0.91	0.8		0.0037	0.0031	0.0305	0.0379	0.3141	0.1854	0.1406	0.103	0.0061	0.0091	0.3829	0.2168	0.0269	0.0805		1.2064	1.1013	1.0203	0.8154		100	100	100	100		Xenobiotics	Chemical	100005383	41447-17-0	1129	144.102
	3541			1,2,3-benzenetriol sulfate (2)	LC/MS neg	48762								0.3	1.45	0.31	1.49		0.1899	0.0798	0.634	0.3451	0.1439	0.118	0.0538	0.0485	0.9107	0.4775	0.1714	0.1228	0.4758	0.4396		3.3538	1.0305	1.0039	1.4919		100	100	100	100		Xenobiotics	Chemical	100006374		1709	204.981
	3543			3-hydroxypyridine sulfate	LC/MS neg	48448								0.63	0.97	0.66	1.03		0.1487	0.0653	0.1541	0.129	0.6791	0.2968	0.1892	0.1285	0.4569	0.282	0.1938	0.1332	0.4654	0.4334		1.6979	1.1259	1.0673	1.0967		100	100	100	100		Xenobiotics	Chemical	100006098	1955-23-3	1595.5	173.987
